# Supplementary material
Source: PubMed Central journal article supplement (PMC2750001)
Supplement: NIHMS124089-supplement-Table_1s.pdf [file NIHMS124089-supplement-Table_1s.pdf]

**Supplementary Table 1s:** Contributor Information and Demographics for Samples in Sets

| Set  | Contributor                                    | Case |        | Control |        | Country of Origin |
|------|------------------------------------------------|------|--------|---------|--------|-------------------|
|      |                                                | Male | Female | Male    | Female |                   |
| 1    | LFRR/Harley                                    |      | 411    |         | 307    | European-American |
|      | James                                          |      | 60     |         | 82     | European-American |
|      | Merrill                                        |      | 61     |         | 61     | European-American |
|      | Feinstein Institute of Medical Research        |      | 0      |         | 418    | European-American |
| 2    | LFRR/Harley                                    |      | 457    |         | 395    | European-American |
|      | Moser/Gaffney                                  |      | 50     |         | 154    | European-American |
| 3    | LFRR/Harley                                    | 58   | 332    | 68      | 252    | European-American |
|      | Gilkeson                                       | 11   | 67     | 20      | 171    | European-American |
|      | Feinstein Institute of Medical Research        | 0    | 0      | 130     | 280    | European-American |
|      | James                                          | 13   | 90     | 17      | 72     | European-American |
|      | PROFILE <sup>a</sup>                           | 0    | 307    | 372     | 723    | European-American |
|      | Merrill                                        | 8    | 70     | 1       | 1      | European-American |
|      | Moser/Gaffney                                  | 16   | 287    | 0       | 0      | European-American |
| 4    | Set 3 above plus:                              |      |        |         |        |                   |
|      | Alarcón-Riquelme                               |      | 130    |         |        | Scandinavia       |
|      | Alarcón-Riquelme                               |      | 31     |         |        | Spain             |
|      | Alarcón-Riquelme                               |      | 5      |         |        | UK                |
|      | Alarcón-Riquelme                               |      | 7      |         |        | USA               |
| Vyse | 11                                             | 240  | 168    | 376     | UK     |                   |
| 5    | Alarcón-Riquelme/ Pons-Estel B                 |      | 63     |         | 110    | Argentina         |
|      | Alarcón-Riquelme/ Lawerys                      |      | 91     |         | 62     | Belgium           |
|      | Alarcón- Riquelme/Witte                        |      | 336    |         | 117    | Germany           |
|      | Alarcón Riquelme/ Endreffy                     |      | 43     |         | 38     | Hungary           |
|      | Alarcón Riquelme/ D'Alfonso                    |      | 320    |         | 339    | Italy             |
|      | Alarcón Riquelme/ Vasconcelos/Martins Da Silva |      | 193    |         | 181    | Portugal          |
|      | Alarcón Riquelme/ Martin                       |      | 238    |         | 235    | Spain             |
|      | Alarcón Riquelme/ Forstengård                  |      | 116    |         | 453    | Sweden            |
| 6    | LFRR/Harley                                    | 27   | 363    | 55      | 145    | African-American  |
|      | Oksenberg (Univ. California San Francisco)     | 0    | 0      | 60      | 19     | African-American  |
|      | Gilkeson                                       | 7    | 109    | 7       | 60     | African-American  |
|      | Feinstein Institute of Medical Research        | 0    | 0      | 107     | 252    | African-American  |
|      | James                                          | 3    | 39     | 5       | 35     | African-American  |
|      | Merrill                                        | 3    | 31     | 2       | 3      | African-American  |
| 7    | Bae                                            | 40   | 621    | 51      | 730    | Korea             |

**Abbreviations:** LFRR, Lupus Family Registry Repository. <sup>a</sup>PROFILE Study Group Members: Graciela S Alarcón, Elizabeth E Brown, Robert P Kimberly, Jeffery C Edberg, Rosalind Ramsey-Goldman, John D Reveille, Gerald McGwin, Jr., Luis M. Vilá, Michelle A. Petri.
