# Supplementary material
Source: PubMed Central journal article supplement (PMC2750001)
Supplement: NIHMS124089-supplement-table_2.pdf [file NIHMS124089-supplement-table_2.pdf]

| Supplemental Table 2a. |          | Set 1: EA Female Only (532 cases/868 ctrls) |      |      |               |                           | Set2: EA Female + Male (507cases/549 ctrls) |      |      |         |                    |
|------------------------|----------|---------------------------------------------|------|------|---------------|---------------------------|---------------------------------------------|------|------|---------|--------------------|
| SNP                    | BP       | MA                                          | F_A  | F_U  | P             | OR (95% CI)               | MA                                          | F_A  | F_U  | P       | OR (95% CI)        |
| rs3808391              | 56953203 |                                             |      |      |               |                           | G                                           | 0.43 | 0.39 | 0.1096  | 1.15 (0.97 - 1.37) |
| rs182832               | 56953415 |                                             |      |      |               |                           | A                                           | 0.21 | 0.20 | 0.5414  | 1.07 (0.86 - 1.32) |
| rs6983130              | 56955793 | G                                           | 0.17 | 0.21 | 0.0124        | 0.78 (0.64 - 0.95)        | G                                           | 0.17 | 0.20 | 0.05965 | 0.81 (0.65 - 1.01) |
| rs6474026              | 56956047 |                                             |      |      |               |                           | G                                           | 0.17 | 0.20 | 0.1126  | 0.84 (0.67 - 1.04) |
| rs7834615              | 56959994 |                                             |      |      |               |                           | G                                           | 0.43 | 0.40 | 0.1363  | 1.14 (0.96 - 1.36) |
| rs333616               | 56963551 | C                                           | 0.41 | 0.44 | 0.2043        | 0.90 (0.78 - 1.06)        |                                             |      |      |         |                    |
| rs9643489              | 56972210 | G                                           | 0.09 | 0.08 | 0.4467        | 1.11 (0.85 - 1.46)        |                                             |      |      |         |                    |
| rs1027989              | 56976975 | C                                           | 0.09 | 0.08 | 0.6127        | 1.07 (0.82 - 1.40)        |                                             |      |      |         |                    |
| rs10095917             | 56992814 | T                                           | 0.19 | 0.23 | <b>0.0061</b> | <b>0.77 (0.64 - 0.93)</b> | A                                           | 0.20 | 0.22 | 0.1397  | 0.85 (0.69 - 1.05) |
| rs7829816              | 57011940 |                                             |      |      |               |                           | G                                           | 0.18 | 0.21 | 0.1007  | 0.84 (0.67 - 1.04) |
| rs2100245              | 57012654 |                                             |      |      |               |                           | G                                           | 0.19 | 0.22 | 0.08135 | 0.83 (0.67 - 1.02) |
| rs12334430             | 57022514 | A                                           | 0.17 | 0.21 | <b>0.0073</b> | <b>0.76 (0.63 - 0.93)</b> | T                                           | 0.18 | 0.20 | 0.1934  | 0.86 (0.69 - 1.08) |
| rs7813271              | 57025705 | G                                           | 0.17 | 0.21 | 0.0107        | 0.78 (0.64 - 0.94)        | G                                           | 0.17 | 0.19 | 0.1806  | 0.86 (0.69 - 1.07) |
| rs2292419              | 57029334 | C                                           | 0.32 | 0.28 | 0.0239        | 1.21 (1.03 - 1.43)        |                                             |      |      |         |                    |
| rs2668017              | 57032420 | T                                           | 0.28 | 0.25 | 0.1282        | 1.14 (0.96 - 1.36)        |                                             |      |      |         |                    |
| rs2668021              | 57036101 | C                                           | 0.23 | 0.27 | 0.0504        | 0.84 (0.70 - 1.00)        | G                                           | 0.24 | 0.25 | 0.827   | 0.98 (0.80 - 1.19) |
| rs2719266              | 57037257 |                                             |      |      |               |                           | A                                           | 0.43 | 0.45 | 0.3684  | 0.92 (0.78 - 1.10) |
| rs2719265              | 57037831 |                                             |      |      |               |                           | A                                           | 0.43 | 0.45 | 0.3284  | 0.92 (0.77 - 1.09) |
| rs1877301              | 57039144 |                                             |      |      |               |                           | A                                           | 0.43 | 0.45 | 0.3485  | 0.92 (0.78 - 1.09) |
| rs952784               | 57046643 |                                             |      |      |               |                           | A                                           | 0.20 | 0.21 | 0.3979  | 0.91 (0.74 - 1.13) |
| rs16922502             | 57049990 | T                                           | 0.23 | 0.21 | 0.2868        | 1.11 (0.92 - 1.33)        |                                             |      |      |         |                    |
| rs2466007              | 57051741 |                                             |      |      |               |                           | G                                           | 0.43 | 0.45 | 0.3652  | 0.92 (0.78 - 1.10) |
| rs2667979              | 57060355 | T                                           | 0.22 | 0.27 | <b>0.0062</b> | <b>0.78 (0.65 - 0.93)</b> |                                             |      |      |         |                    |
| rs2667978              | 57060505 |                                             |      |      |               |                           | G                                           | 0.20 | 0.21 | 0.8176  | 0.98 (0.79 - 1.21) |
| rs4061077              | 57065996 | A                                           | 0.23 | 0.27 | <b>0.0089</b> | <b>0.79 (0.66 - 0.94)</b> |                                             |      |      |         |                    |
| rs1912818              | 57066875 | G                                           | 0.23 | 0.27 | 0.0185        | 0.81 (0.68 - 0.96)        | C                                           | 0.24 | 0.24 | 0.9895  | 1.00 (0.82 - 1.22) |

Supplemental Table 2b. Set 3A: EA Female + Male (1259 cases/2107 ctrls)

| SNP              | BP              | MA | F_A     | F_U     | P               | OR (95% CI)             | PCA Corrected P-value | PCA Corrected OR (95% CI) |
|------------------|-----------------|----|---------|---------|-----------------|-------------------------|-----------------------|---------------------------|
| rs3808391        | 56953203        | G  | 0.426   | 0.4076  | 0.1347          | 1.08 (0.98-1.20)        | 0.2871                | 1.06 (0.95-1.17)          |
| rs182832         | 56953415        | A  | 0.2102  | 0.2012  | 0.3755          | 1.06 (0.93-1.20)        | 0.4543                | 1.05 (0.93-1.19)          |
| rs6983130        | 56955793        | G  | 0.1494  | 0.1874  | <b>0.000109</b> | <b>0.76 (0.66-0.87)</b> | <b>0.002136</b>       | <b>0.79 (0.68-0.92)</b>   |
| rs6474026        | 56956047        | G  | 0.1738  | 0.1979  | 0.01524         | 0.85 (0.75-0.97)        | 0.09826               | 0.89 (0.78-1.02)          |
| rs7834615        | 56959994        | G  | 0.4315  | 0.4169  | 0.2384          | 1.06 (0.96-1.18)        | 0.4643                | 1.04 (0.94-1.15)          |
| rs16922309       | 56963245        | G  | 0.04845 | 0.04796 | 0.9272          | 1.01 (0.80-1.27)        | 0.8911                | 1.02 (0.80-1.28)          |
| rs333619         | 56964623        | A  | 0.459   | 0.4473  | 0.3418          | 1.05 (0.95-1.16)        | 0.6624                | 1.02 (0.92-1.14)          |
| rs7820484        | 56968031        | C  | 0.02782 | 0.03014 | 0.5799          | 0.92 (0.68-1.24)        | 0.4708                | 0.89 (0.66-1.21)          |
| rs7005312        | 56968993        | A  | 0.4856  | 0.4849  | 0.9551          | 1.00 (0.91-1.11)        | 0.4749                | 1.04 (0.94-1.15)          |
| rs1466138        | 56970495        | A  | 0.07546 | 0.0859  | 0.135           | 0.87 (0.73-1.04)        | 0.06075               | 0.84 (0.70-1.01)          |
| rs7840325        | 56971216        | A  | 0.4419  | 0.4312  | 0.3835          | 1.05 (0.95-1.16)        | 0.551                 | 1.03 (0.93-1.14)          |
| rs9643489        | 56972210        | C  | 0.08447 | 0.09406 | 0.1885          | 0.89 (0.75-1.06)        | 0.08376               | 0.86 (0.72-1.02)          |
| rs7831367        | 56973233        | G  | 0.0871  | 0.09528 | 0.2655          | 0.91 (0.76-1.08)        | 0.1233                | 0.87 (0.73-1.04)          |
| rs1980042        | 56975196        | G  | 0.4212  | 0.4224  | 0.9252          | 1.00 (0.90-1.10)        | 0.701                 | 1.02 (0.92-1.13)          |
| rs1027990        | 56976863        | G  | 0.4185  | 0.4217  | 0.7951          | 0.99 (0.89-1.09)        | 0.8223                | 1.01 (0.91-1.12)          |
| rs1027989        | 56976975        | C  | 0.0838  | 0.09339 | 0.1861          | 0.89 (0.75-1.06)        | 0.07911               | 0.85 (0.71-1.02)          |
| rs6474030        | 56980702        | C  | 0.1116  | 0.1175  | 0.4652          | 0.94 (0.81-1.10)        | 0.272                 | 0.91 (0.78-1.07)          |
| rs4551325        | 56985745        | G  | 0.303   | 0.332   | 0.01407         | 0.87 (0.79-0.97)        | 0.09163               | 0.91 (0.81-1.02)          |
| rs1397976        | 56987939        | A  | 0.316   | 0.3433  | 0.02171         | 0.88 (0.80-0.98)        | 0.1147                | 0.91 (0.82-1.02)          |
| rs6474033        | 56988570        | A  | 0.1147  | 0.1176  | 0.7222          | 0.97 (0.83-1.14)        | 0.5121                | 0.95 (0.81-1.11)          |
| rs10095917       | 56992814        | A  | 0.2073  | 0.2283  | 0.0451          | 0.88 (0.78-1.00)        | 0.3763                | 0.94 (0.82-1.08)          |
| rs6985030        | 57007430        | A  | 0.1467  | 0.1606  | 0.126           | 0.90 (0.78-1.03)        | 0.818                 | 0.98 (0.84-1.15)          |
| rs16922425       | 57008823        | A  | 0.5068  | 0.4874  | 0.1239          | 1.08 (0.98-1.19)        | 0.5332                | 1.04 (0.93-1.16)          |
| <b>rs7829816</b> | <b>57011940</b> | G  | 0.1921  | 0.2106  | 0.06967         | 0.89 (0.79-1.01)        | 0.5779                | 0.96 (0.83-1.11)          |
| rs2100245        | 57012654        | G  | 0.2011  | 0.2212  | 0.0534          | 0.89 (0.79-1.00)        | 0.4798                | 0.95 (0.83-1.09)          |
| rs16922459       | 57016726        | A  | 0.149   | 0.1669  | 0.05385         | 0.87 (0.76-1.00)        | 0.537                 | 0.95 (0.81-1.11)          |
| rs12334430       | 57022514        | T  | 0.1838  | 0.2031  | 0.05527         | 0.89 (0.78-1.00)        | 0.5739                | 0.96 (0.83-1.11)          |
| rs16922463       | 57024223        | A  | 0.1832  | 0.2019  | 0.06337         | 0.89 (0.78-1.01)        | 0.6284                | 0.96 (0.83-1.12)          |
| rs7813271        | 57025705        | G  | 0.1835  | 0.2017  | 0.07049         | 0.89 (0.79-1.01)        | 0.6562                | 0.97 (0.83-1.12)          |
| rs2292419        | 57029334        | G  | 0.2971  | 0.2942  | 0.7999          | 1.01 (0.91-1.13)        | 0.8643                | 1.01 (0.90-1.13)          |
| rs10089932       | 57029511        | G  | 0.2959  | 0.2963  | 0.9703          | 1.00 (0.90-1.11)        | 0.9952                | 1.00 (0.90-1.12)          |
| rs7828258        | 57030499        | G  | 0.5064  | 0.4869  | 0.1248          | 1.08 (0.98-1.19)        | 0.5938                | 1.03 (0.92-1.16)          |
| rs2668017        | 57032420        | A  | 0.251   | 0.2617  | 0.3288          | 0.95 (0.84-1.06)        | 0.5485                | 0.96 (0.86-1.09)          |
| rs2719240        | 57032602        | C  | 0.2858  | 0.2965  | 0.35            | 0.95 (0.85-1.06)        | 0.6526                | 0.97 (0.87-1.09)          |
| rs2719268        | 57034636        | G  | 0.2516  | 0.2618  | 0.3558          | 0.95 (0.85-1.06)        | 0.5617                | 0.97 (0.86-1.09)          |
| rs2668021        | 57036101        | G  | 0.2466  | 0.2578  | 0.313           | 0.94 (0.84-1.06)        | 0.5888                | 1.04 (0.90-1.20)          |
| rs12114560       | 57037042        | A  | 0.04011 | 0.03939 | 0.8845          | 1.02 (0.79-1.31)        | 0.5957                | 1.07 (0.83-1.39)          |
| rs2719266        | 57037257        | A  | 0.433   | 0.453   | 0.1151          | 0.92 (0.84-1.02)        | 0.8533                | 0.99 (0.87-1.12)          |
| rs2719265        | 57037831        | A  | 0.4383  | 0.4582  | 0.119           | 0.92 (0.84-1.02)        | 0.9053                | 0.99 (0.88-1.13)          |
| rs907425         | 57038845        | G  | 0.4515  | 0.4741  | 0.07606         | 0.92 (0.83-1.01)        | 0.635                 | 0.97 (0.86-1.10)          |
| rs1877301        | 57039144        | A  | 0.4368  | 0.4582  | 0.09139         | 0.92 (0.83-1.01)        | 0.7721                | 0.98 (0.87-1.11)          |
| rs868541         | 57039314        | A  | 0.4368  | 0.4589  | 0.08126         | 0.92 (0.83-1.01)        | 0.7194                | 0.98 (0.86-1.11)          |
| rs13257714       | 57040111        | A  | 0.1998  | 0.2093  | 0.3522          | 0.94 (0.83-1.07)        | 0.3876                | 0.95 (0.84-1.07)          |
| rs2667985        | 57042912        | C  | 0.1169  | 0.1353  | 0.02922         | 0.85 (0.73-0.98)        | 0.002084              | 0.78 (0.67-0.91)          |
| rs1027987        | 57044737        | G  | 0.4376  | 0.4585  | 0.101           | 0.92 (0.83-1.02)        | 0.8257                | 0.99 (0.87-1.12)          |
| rs1027986        | 57045025        | G  | 0.4376  | 0.4585  | 0.1006          | 0.92 (0.83-1.02)        | 0.8255                | 0.99 (0.87-1.12)          |
| rs907423         | 57046172        | C  | 0.4348  | 0.4556  | 0.1038          | 0.92 (0.83-1.02)        | 0.7441                | 0.98 (0.86-1.11)          |
| rs952784         | 57046643        | A  | 0.1994  | 0.2099  | 0.3014          | 0.94 (0.83-1.06)        | 0.3277                | 0.94 (0.83-1.06)          |
| rs7838485        | 57048155        | C  | 0.1982  | 0.2095  | 0.2632          | 0.93 (0.82-1.05)        | 0.2898                | 0.93 (0.82-1.06)          |
| rs2719232        | 57048738        | A  | 0.4356  | 0.4587  | 0.06893         | 0.91 (0.83-1.01)        | 0.6673                | 0.97 (0.86-1.10)          |
| rs10101914       | 57049241        | G  | 0.2024  | 0.2111  | 0.4009          | 0.95 (0.84-1.07)        | 0.4379                | 0.95 (0.84-1.08)          |
| rs16922502       | 57049990        | A  | 0.1983  | 0.2091  | 0.2898          | 0.94 (0.83-1.06)        | 0.3131                | 0.94 (0.83-1.06)          |
| rs2466007        | 57051741        | G  | 0.426   | 0.4494  | 0.06453         | 0.91 (0.83-1.01)        | 0.5276                | 0.96 (0.85-1.09)          |
| rs16922508       | 57054784        | G  | 0.2468  | 0.2525  | 0.6075          | 0.97 (0.87-1.09)        | 0.1367                | 1.12 (0.96-1.31)          |
| rs7828483        | 57055442        | C  | 0.2787  | 0.2777  | 0.9319          | 1.01 (0.89-1.13)        | 0.06663               | 1.16 (0.99-1.36)          |
| rs2719246        | 57056975        | a  | 0.1449  | 0.1573  | 0.1914          | 0.91 (0.79-1.05)        | 0.916                 | 1.01 (0.86-1.19)          |
| <b>rs2667978</b> | 57060505        | G  | 0.2029  | 0.2106  | 0.4565          | 0.95 (0.85-1.08)        | 0.3605                | 1.08 (0.92-1.25)          |
| rs16920176       | 57061690        | G  | 0.0421  | 0.04082 | 0.8             | 1.03 (0.81-1.32)        | 0.4785                | 1.10 (0.85-1.41)          |
| rs16920186       | 57063272        | G  | 0.0421  | 0.04082 | 0.8             | 1.03 (0.81-1.32)        | 0.4785                | 1.10 (0.85-1.41)          |
| rs4061077        | 57065996        | A  | 0.2446  | 0.2496  | 0.6488          | 0.97 (0.87-1.09)        | 0.1304                | 1.13 (0.97-1.31)          |
| rs9650314        | 57066164        | A  | 0.2021  | 0.2091  | 0.4961          | 0.96 (0.85-1.08)        | 0.301                 | 1.09 (0.93-1.27)          |
| rs16920192       | 57066580        | A  | 0.2442  | 0.25    | 0.6002          | 0.97 (0.87-1.09)        | 0.153                 | 1.12 (0.96-1.30)          |
| rs1912818        | 57066875        | C  | 0.2438  | 0.2494  | 0.6116          | 0.97 (0.87-1.09)        | 0.1422                | 1.12 (0.96-1.31)          |
| rs2719252        | 57067406        | G  | 0.2428  | 0.2479  | 0.6468          | 0.97 (0.87-1.09)        | 0.1147                | 1.13 (0.97-1.32)          |
| rs2719253        | 57067720        | G  | 0.2446  | 0.2496  | 0.6488          | 0.97 (0.87-1.09)        | 0.1304                | 1.13 (0.97-1.31)          |
| rs2667974        | 57067931        | A  | 0.2412  | 0.2475  | 0.5766          | 0.97 (0.86-1.09)        | 0.1687                | 1.11 (0.96-1.30)          |
| rs10282821       | 57068622        | A  | 0.2145  | 0.2105  | 0.6981          | 1.02 (0.91-1.16)        | 0.8059                | 1.02 (0.90-1.15)          |
| rs2667972        | 57069215        | A  | 0.2025  | 0.2091  | 0.5255          | 0.96 (0.85-1.09)        | 0.2813                | 1.09 (0.93-1.27)          |
| rs2719243        | 57069530        | G  | 0.2446  | 0.2498  | 0.6411          | 0.97 (0.87-1.09)        | 0.1342                | 1.12 (0.96-1.31)          |
| rs2719242        | 57069786        | G  | 0.2458  | 0.2514  | 0.611           | 0.97 (0.87-1.09)        | 0.1529                | 1.12 (0.96-1.30)          |
| rs4738466        | 57073255        | G  | 0.1163  | 0.1389  | 0.008003        | 0.82 (0.70-0.95)        | 0.0003999             | 0.75 (0.64-0.88)          |
| rs3106348        | 57079720        | A  | 0.2502  | 0.2532  | 0.7848          | 0.98 (0.88-1.10)        | 0.0919                | 1.14 (0.98-1.33)          |
| rs7824121        | 57084226        | G  | 0.1157  | 0.1371  | 0.01123         | 0.82 (0.71-0.96)        | 0.0006536             | 0.76 (0.65-0.89)          |

Supplemental Table 2c.

Set 3B: EA Female Only (1153 cases/1499 ctrls)

| SNP              | BP              | MA | F_A    | F_U    | P         | OR (95% CI)      | PCA Corrected P- | PCA Corrected OR |
|------------------|-----------------|----|--------|--------|-----------|------------------|------------------|------------------|
|                  |                 |    |        |        |           |                  | value            | (95% CI)         |
| rs3808391        | 56953203        | G  | 0.4278 | 0.4033 | 0.07206   | 1.11 (0.99-1.24) | 0.06603          | 1.11 (0.99-1.24) |
| rs182832         | 56953415        | A  | 0.2061 | 0.1988 | 0.5125    | 1.05 (0.91-1.20) | 0.508            | 1.05 (0.91-1.20) |
| rs6983130        | 56955793        | G  | 0.1502 | 0.1911 | 0.0001613 | 0.75 (0.64-0.87) | 0.0001725        | 0.75 (0.64-0.87) |
| rs6474026        | 56956047        | G  | 0.1759 | 0.2015 | 0.01893   | 0.85 (0.74-0.97) | 0.02025          | 0.85 (0.74-0.97) |
| rs7834615        | 56959994        | G  | 0.4339 | 0.4129 | 0.1269    | 1.09 (0.98-1.22) | 0.1208           | 1.09 (0.98-1.22) |
| rs16922309       | 56963245        | G  | 0.0468 | 0.0514 | 0.4501    | 0.91 (0.71-1.17) | 0.453            | 0.91 (0.71-1.17) |
| rs333619         | 56964623        | A  | 0.4622 | 0.4416 | 0.1356    | 1.09 (0.97-1.21) | 0.1285           | 1.09 (0.98-1.22) |
| rs7820484        | 56968031        | C  | 0.0282 | 0.0267 | 0.7354    | 1.06 (0.76-1.48) | 0.7317           | 1.06 (0.76-1.49) |
| rs7005312        | 56968993        | A  | 0.4838 | 0.4883 | 0.7505    | 0.98 (0.88-1.10) | 0.749            | 0.98 (0.88-1.10) |
| rs1466138        | 56970495        | A  | 0.0772 | 0.0854 | 0.2801    | 0.90 (0.73-1.09) | 0.2794           | 0.90 (0.73-1.09) |
| rs7840325        | 56971216        | A  | 0.4431 | 0.4306 | 0.3641    | 1.05 (0.94-1.17) | 0.3567           | 1.05 (0.94-1.18) |
| rs9643489        | 56972210        | C  | 0.0862 | 0.0942 | 0.3152    | 0.91 (0.75-1.10) | 0.3124           | 0.91 (0.75-1.10) |
| rs7831367        | 56973233        | G  | 0.0883 | 0.0959 | 0.3465    | 0.91 (0.76-1.10) | 0.3416           | 0.91 (0.75-1.10) |
| rs1980042        | 56975196        | G  | 0.4175 | 0.4286 | 0.4153    | 0.96 (0.86-1.07) | 0.4117           | 0.95 (0.85-1.07) |
| rs1027990        | 56976863        | G  | 0.4144 | 0.4279 | 0.3247    | 0.95 (0.85-1.06) | 0.3191           | 0.95 (0.85-1.06) |
| rs1027989        | 56976975        | C  | 0.085  | 0.0936 | 0.2785    | 0.90 (0.74-1.09) | 0.2761           | 0.90 (0.74-1.09) |
| rs6474030        | 56980702        | C  | 0.111  | 0.1177 | 0.4459    | 0.94 (0.79-1.11) | 0.4435           | 0.94 (0.79-1.11) |
| rs4551325        | 56985745        | G  | 0.3023 | 0.3379 | 0.005996  | 0.85 (0.76-0.95) | 0.006278         | 0.85 (0.76-0.96) |
| rs1397976        | 56987939        | A  | 0.3155 | 0.3486 | 0.0115    | 0.86 (0.77-0.97) | 0.01185          | 0.86 (0.77-0.97) |
| rs6474033        | 56988570        | A  | 0.114  | 0.1179 | 0.6588    | 0.96 (0.81-1.14) | 0.656            | 0.96 (0.81-1.14) |
| rs10095917       | 56992814        | A  | 0.2077 | 0.2325 | 0.03134   | 0.87 (0.76-0.99) | 0.03254          | 0.87 (0.76-0.99) |
| rs6985030        | 57007430        | A  | 0.1463 | 0.1633 | 0.08973   | 0.88 (0.75-1.02) | 0.08977          | 0.88 (0.75-1.02) |
| rs16922425       | 57008823        | A  | 0.5004 | 0.4907 | 0.4804    | 1.04 (0.93-1.16) | 0.4795           | 1.04 (0.93-1.16) |
| <b>rs7829816</b> | <b>57011940</b> | G  | 0.1907 | 0.2136 | 0.04008   | 0.87 (0.76-0.99) | 0.04214          | 0.87 (0.76-1.00) |
| rs2100245        | 57012654        | G  | 0.2001 | 0.2231 | 0.04209   | 0.87 (0.76-1.00) | 0.04378          | 0.87 (0.76-1.00) |
| rs16922459       | 57016726        | A  | 0.1484 | 0.1702 | 0.03203   | 0.85 (0.73-0.99) | 0.03358          | 0.85 (0.73-0.99) |
| rs12334430       | 57022514        | T  | 0.182  | 0.2055 | 0.03276   | 0.86 (0.75-0.99) | 0.03589          | 0.86 (0.75-0.99) |
| rs16922463       | 57024223        | A  | 0.1814 | 0.2045 | 0.03558   | 0.86 (0.75-0.99) | 0.03884          | 0.87 (0.76-0.99) |
| rs7813271        | 57025705        | G  | 0.1817 | 0.2041 | 0.04067   | 0.87 (0.75-0.99) | 0.04422          | 0.87 (0.76-1.00) |
| rs2292419        | 57029334        | G  | 0.3027 | 0.2889 | 0.2735    | 1.07 (0.95-1.20) | 0.2725           | 1.07 (0.95-1.20) |
| rs10089932       | 57029511        | G  | 0.3005 | 0.2921 | 0.5032    | 1.04 (0.92-1.17) | 0.5025           | 1.04 (0.92-1.17) |
| rs7828258        | 57030499        | G  | 0.5017 | 0.489  | 0.3576    | 1.05 (0.94-1.17) | 0.3593           | 1.05 (0.94-1.17) |
| rs2668017        | 57032420        | A  | 0.2572 | 0.2582 | 0.934     | 0.99 (0.88-1.13) | 0.934            | 0.99 (0.88-1.13) |
| rs2719240        | 57032602        | C  | 0.2904 | 0.2921 | 0.8976    | 0.99 (0.88-1.12) | 0.8979           | 0.99 (0.88-1.12) |
| rs2719268        | 57034636        | G  | 0.2578 | 0.2582 | 0.9763    | 1.00 (0.88-1.13) | 0.9763           | 1.00 (0.88-1.13) |
| rs2668021        | 57036101        | G  | 0.2463 | 0.2558 | 0.4282    | 0.95 (0.84-1.08) | 0.4328           | 0.95 (0.84-1.08) |
| rs12114560       | 57037042        | A  | 0.0373 | 0.0377 | 0.9398    | 0.99 (0.74-1.32) | 0.9405           | 0.99 (0.75-1.31) |
| rs2719266        | 57037257        | A  | 0.436  | 0.4516 | 0.2569    | 0.94 (0.84-1.05) | 0.2636           | 0.94 (0.84-1.05) |
| rs2719265        | 57037831        | A  | 0.4409 | 0.4555 | 0.2888    | 0.94 (0.85-1.05) | 0.2958           | 0.94 (0.85-1.05) |
| rs907425         | 57038845        | G  | 0.4544 | 0.471  | 0.2309    | 0.94 (0.84-1.04) | 0.2365           | 0.94 (0.84-1.04) |
| rs1877301        | 57039144        | A  | 0.4392 | 0.456  | 0.2246    | 0.93 (0.84-1.04) | 0.2307           | 0.94 (0.84-1.04) |
| rs868541         | 57039314        | A  | 0.4392 | 0.4566 | 0.2067    | 0.93 (0.84-1.04) | 0.2127           | 0.93 (0.84-1.04) |
| rs13257714       | 57040111        | A  | 0.2039 | 0.2091 | 0.6416    | 0.97 (0.85-1.11) | 0.6391           | 0.97 (0.85-1.11) |
| rs2667985        | 57042912        | C  | 0.1176 | 0.1371 | 0.03581   | 0.84 (0.71-0.99) | 0.03484          | 0.84 (0.71-0.99) |
| rs1027987        | 57044737        | G  | 0.4402 | 0.4559 | 0.252     | 0.94 (0.84-1.05) | 0.2583           | 0.94 (0.84-1.05) |
| rs1027986        | 57045025        | G  | 0.4402 | 0.456  | 0.251     | 0.94 (0.84-1.05) | 0.2572           | 0.94 (0.84-1.05) |
| rs907423         | 57046172        | C  | 0.4372 | 0.4527 | 0.2648    | 0.94 (0.84-1.05) | 0.2721           | 0.94 (0.84-1.05) |
| rs952784         | 57046643        | A  | 0.2034 | 0.2096 | 0.5788    | 0.96 (0.84-1.10) | 0.5764           | 0.96 (0.84-1.10) |
| rs7838485        | 57048155        | C  | 0.2021 | 0.2095 | 0.5096    | 0.96 (0.84-1.09) | 0.5067           | 0.96 (0.83-1.09) |
| rs2719232        | 57048738        | A  | 0.4384 | 0.4563 | 0.193     | 0.93 (0.83-1.04) | 0.1991           | 0.93 (0.84-1.04) |
| rs10101914       | 57049241        | G  | 0.2061 | 0.2111 | 0.6622    | 0.97 (0.85-1.11) | 0.66             | 0.97 (0.85-1.11) |
| rs16922502       | 57049990        | A  | 0.2023 | 0.2091 | 0.5392    | 0.96 (0.84-1.10) | 0.536            | 0.96 (0.84-1.10) |
| rs2466007        | 57051741        | G  | 0.4309 | 0.4489 | 0.1908    | 0.93 (0.83-1.04) | 0.1962           | 0.93 (0.84-1.04) |
| rs16922508       | 57054784        | G  | 0.2457 | 0.2515 | 0.6256    | 0.97 (0.85-1.10) | 0.6286           | 0.97 (0.86-1.10) |
| rs7828483        | 57055442        | C  | 0.2747 | 0.2806 | 0.6569    | 0.97 (0.85-1.11) | 0.6537           | 0.97 (0.85-1.11) |
| rs2719246        | 57056975        | a  | 0.1446 | 0.1565 | 0.2405    | 0.91 (0.78-1.06) | 0.2538           | 0.92 (0.79-1.07) |
| <b>rs2667978</b> | <b>57060505</b> | G  | 0.2047 | 0.2111 | 0.5659    | 0.96 (0.84-1.10) | 0.5677           | 0.96 (0.84-1.10) |
| rs16920176       | 57061690        | G  | 0.039  | 0.04   | 0.8534    | 0.97 (0.74-1.29) | 0.8554           | 0.97 (0.74-1.28) |
| rs16920186       | 57063272        | G  | 0.039  | 0.04   | 0.8534    | 0.97 (0.74-1.29) | 0.8554           | 0.97 (0.74-1.28) |
| rs4061077        | 57065996        | A  | 0.2433 | 0.2495 | 0.6024    | 0.97 (0.85-1.10) | 0.6051           | 0.97 (0.85-1.10) |
| rs9650314        | 57066164        | A  | 0.2037 | 0.2098 | 0.5888    | 0.96 (0.84-1.10) | 0.5915           | 0.96 (0.84-1.10) |
| rs16920192       | 57066580        | A  | 0.2428 | 0.2495 | 0.5772    | 0.96 (0.85-1.09) | 0.5798           | 0.97 (0.85-1.09) |
| rs1912818        | 57066875        | C  | 0.2424 | 0.2492 | 0.5698    | 0.96 (0.85-1.09) | 0.5732           | 0.96 (0.85-1.09) |
| rs2719252        | 57067406        | G  | 0.2413 | 0.2477 | 0.5928    | 0.97 (0.85-1.10) | 0.5966           | 0.97 (0.85-1.10) |
| rs2719253        | 57067720        | G  | 0.2433 | 0.2495 | 0.6024    | 0.97 (0.85-1.10) | 0.6051           | 0.97 (0.85-1.10) |
| rs2667974        | 57067931        | A  | 0.2395 | 0.2469 | 0.538     | 0.96 (0.84-1.09) | 0.5439           | 0.96 (0.85-1.09) |
| rs10282821       | 57068622        | A  | 0.2177 | 0.2135 | 0.7111    | 1.03 (0.90-1.17) | 0.7099           | 1.03 (0.90-1.17) |
| rs2667972        | 57069215        | A  | 0.2042 | 0.2098 | 0.6207    | 0.97 (0.85-1.11) | 0.6231           | 0.97 (0.85-1.11) |
| rs2719243        | 57069530        | G  | 0.2433 | 0.2495 | 0.6024    | 0.97 (0.85-1.10) | 0.6051           | 0.97 (0.85-1.10) |
| rs2719242        | 57069786        | G  | 0.2446 | 0.2512 | 0.5819    | 0.97 (0.85-1.10) | 0.5844           | 0.97 (0.85-1.09) |
| rs4738466        | 57073255        | G  | 0.1171 | 0.1408 | 0.01115   | 0.81 (0.69-0.95) | 0.01142          | 0.81 (0.69-0.95) |
| rs3106348        | 57079720        | A  | 0.2493 | 0.2535 | 0.7297    | 0.98 (0.86-1.11) | 0.7308           | 0.98 (0.86-1.11) |
| rs7824121        | 57084226        | G  | 0.1163 | 0.1384 | 0.01723   | 0.82 (0.70-0.97) | 0.01741          | 0.82 (0.69-0.97) |

Supplemental Table 2d. Set 3C: EA Male Only (106 cases/608 ctrls)

| SNP              | BP              | MA | F_A     | F_U     | P        | OR (95% CI)      | PCA Corrected P-value | PCA Corrected OR (95% CI) |
|------------------|-----------------|----|---------|---------|----------|------------------|-----------------------|---------------------------|
| rs3808391        | 56953203        | G  | 0.4057  | 0.4185  | 0.7274   | 0.95 (0.70-1.28) | 0.7306                | 0.95 (0.71-1.27)          |
| rs182832         | 56953415        | A  | 0.2547  | 0.2072  | 0.12     | 1.31 (0.93-1.83) | 0.1246                | 1.30 (0.93-1.82)          |
| rs6983130        | 56955793        | G  | 0.1408  | 0.1783  | 0.189    | 0.76 (0.50-1.15) | 0.1775                | 0.74 (0.48-1.14)          |
| rs6474026        | 56956047        | G  | 0.1509  | 0.1889  | 0.1871   | 0.76 (0.51-1.14) | 0.178                 | 0.75 (0.50-1.14)          |
| rs7834615        | 56959994        | G  | 0.4057  | 0.4267  | 0.5675   | 0.92 (0.68-1.23) | 0.5721                | 0.92 (0.69-1.23)          |
| rs16922309       | 56963245        | G  | 0.06604 | 0.03954 | 0.08087  | 1.72 (0.93-3.17) | 0.0773                | 1.77 (0.94-3.34)          |
| rs333619         | 56964623        | A  | 0.4245  | 0.4613  | 0.3206   | 0.86 (0.64-1.16) | 0.3135                | 0.86 (0.64-1.16)          |
| rs7820484        | 56968031        | C  | 0.02358 | 0.03865 | 0.2798   | 0.60 (0.24-1.53) | 0.2757                | 0.59 (0.23-1.52)          |
| rs7005312        | 56968993        | A  | 0.5048  | 0.4767  | 0.4528   | 1.12 (0.83-1.50) | 0.4651                | 1.11 (0.84-1.48)          |
| rs1466138        | 56970495        | A  | 0.0566  | 0.08717 | 0.1358   | 0.63 (0.34-1.16) | 0.1611                | 0.66 (0.36-1.18)          |
| rs7840325        | 56971216        | A  | 0.4292  | 0.4326  | 0.9282   | 0.99 (0.73-1.33) | 0.9278                | 0.99 (0.73-1.33)          |
| rs9643489        | 56972210        | C  | 0.06604 | 0.09375 | 0.1924   | 0.68 (0.38-1.22) | 0.2182                | 0.71 (0.41-1.23)          |
| rs7831367        | 56973233        | G  | 0.07353 | 0.09375 | 0.3524   | 0.77 (0.44-1.34) | 0.3777                | 0.79 (0.46-1.34)          |
| rs1980042        | 56975196        | G  | 0.4623  | 0.4071  | 0.1324   | 1.25 (0.93-1.68) | 0.1308                | 1.26 (0.93-1.69)          |
| rs1027990        | 56976863        | G  | 0.4623  | 0.4062  | 0.1266   | 1.26 (0.94-1.69) | 0.1245                | 1.26 (0.94-1.70)          |
| rs1027989        | 56976975        | C  | 0.07075 | 0.09293 | 0.297    | 0.74 (0.42-1.30) | 0.3235                | 0.76 (0.45-1.31)          |
| rs6474030        | 56980702        | C  | 0.1179  | 0.1168  | 0.9617   | 1.01 (0.64-1.59) | 0.9623                | 1.01 (0.65-1.58)          |
| rs4551325        | 56985745        | G  | 0.3113  | 0.3174  | 0.8598   | 0.97 (0.71-1.33) | 0.8577                | 0.97 (0.71-1.34)          |
| rs1397976        | 56987939        | A  | 0.3208  | 0.3303  | 0.7846   | 0.96 (0.70-1.31) | 0.7839                | 0.96 (0.70-1.31)          |
| rs6474033        | 56988570        | A  | 0.1226  | 0.1168  | 0.8068   | 1.06 (0.68-1.65) | 0.8094                | 1.06 (0.68-1.64)          |
| rs10095917       | 56992814        | A  | 0.2028  | 0.2179  | 0.6219   | 0.91 (0.64-1.31) | 0.6173                | 0.91 (0.63-1.31)          |
| rs6985030        | 57007430        | A  | 0.1509  | 0.1538  | 0.9157   | 0.98 (0.65-1.47) | 0.9139                | 0.98 (0.65-1.48)          |
| rs16922425       | 57008823        | A  | 0.5755  | 0.4794  | 0.009859 | 1.47 (1.10-1.98) | 0.009894              | 1.48 (1.10-2.00)          |
| <b>rs7829816</b> | <b>57011940</b> | G  | 0.2075  | 0.2031  | 0.8827   | 1.03 (0.72-1.47) | 0.8798                | 1.03 (0.71-1.49)          |
| rs2100245        | 57012654        | G  | 0.2123  | 0.2163  | 0.8956   | 0.98 (0.68-1.39) | 0.895                 | 0.98 (0.68-1.40)          |
| rs16922459       | 57016726        | A  | 0.1557  | 0.1587  | 0.9104   | 0.98 (0.65-1.46) | 0.909                 | 0.98 (0.65-1.47)          |
| rs12334430       | 57022514        | T  | 0.2028  | 0.1974  | 0.8539   | 1.04 (0.72-1.49) | 0.8513                | 1.04 (0.72-1.50)          |
| rs16922463       | 57024223        | A  | 0.2028  | 0.1957  | 0.8102   | 1.05 (0.73-1.50) | 0.8071                | 1.05 (0.72-1.52)          |
| rs7813271        | 57025705        | G  | 0.2028  | 0.1957  | 0.8102   | 1.05 (0.73-1.50) | 0.8071                | 1.05 (0.72-1.52)          |
| rs2292419        | 57029334        | G  | 0.2358  | 0.3072  | 0.03573  | 0.70 (0.50-0.98) | 0.03496               | 0.69 (0.49-0.97)          |
| rs10089932       | 57029511        | G  | 0.2453  | 0.3067  | 0.0709   | 0.73 (0.53-1.03) | 0.06792               | 0.73 (0.52-1.02)          |
| rs7828258        | 57030499        | G  | 0.5566  | 0.4819  | 0.0447   | 1.35 (1.01-1.81) | 0.04639               | 1.35 (1.01-1.81)          |
| rs2668017        | 57032420        | A  | 0.184   | 0.2706  | 0.007808 | 0.61 (0.42-0.88) | 0.007833              | 0.60 (0.41-0.87)          |
| rs2719240        | 57032602        | C  | 0.2358  | 0.3076  | 0.03495  | 0.69 (0.49-0.98) | 0.03285               | 0.69 (0.49-0.97)          |
| rs2719268        | 57034636        | G  | 0.184   | 0.2706  | 0.007777 | 0.61 (0.42-0.88) | 0.007829              | 0.60 (0.41-0.87)          |
| rs2668021        | 57036101        | G  | 0.25    | 0.2628  | 0.6961   | 0.94 (0.67-1.31) | 0.7037                | 0.94 (0.68-1.30)          |
| rs12114560       | 57037042        | A  | 0.07075 | 0.04359 | 0.0865   | 1.67 (0.92-3.02) | 0.08695               | 1.69 (0.93-3.09)          |
| rs2719266        | 57037257        | A  | 0.4009  | 0.4563  | 0.1345   | 0.80 (0.59-1.07) | 0.1329                | 0.79 (0.59-1.07)          |
| rs2719265        | 57037831        | A  | 0.4104  | 0.4646  | 0.1438   | 0.80 (0.60-1.08) | 0.1473                | 0.80 (0.60-1.08)          |
| rs907425         | 57038845        | G  | 0.4198  | 0.4818  | 0.09529  | 0.78 (0.58-1.05) | 0.101                 | 0.78 (0.59-1.05)          |
| rs1877301        | 57039144        | A  | 0.4104  | 0.4638  | 0.1499   | 0.80 (0.60-1.08) | 0.1528                | 0.81 (0.60-1.08)          |
| rs868541         | 57039314        | A  | 0.4104  | 0.4646  | 0.1438   | 0.80 (0.60-1.08) | 0.1473                | 0.80 (0.60-1.08)          |
| rs13257714       | 57040111        | A  | 0.1557  | 0.2097  | 0.07035  | 0.69 (0.47-1.03) | 0.07672               | 0.70 (0.47-1.04)          |
| rs2667985        | 57042912        | C  | 0.1085  | 0.1308  | 0.3697   | 0.81 (0.51-1.29) | 0.3834                | 0.82 (0.52-1.29)          |
| rs1027987        | 57044737        | G  | 0.4104  | 0.4646  | 0.1433   | 0.80 (0.60-1.08) | 0.1465                | 0.80 (0.60-1.08)          |
| rs1027986        | 57045025        | G  | 0.4104  | 0.4646  | 0.1433   | 0.80 (0.60-1.08) | 0.1465                | 0.80 (0.60-1.08)          |
| rs907423         | 57046172        | C  | 0.4087  | 0.4628  | 0.1474   | 0.80 (0.60-1.08) | 0.1508                | 0.80 (0.60-1.08)          |
| rs952784         | 57046643        | A  | 0.1557  | 0.2105  | 0.06653  | 0.69 (0.47-1.03) | 0.07249               | 0.70 (0.47-1.03)          |
| rs7838485        | 57048155        | C  | 0.1557  | 0.2097  | 0.07035  | 0.69 (0.47-1.03) | 0.07672               | 0.70 (0.47-1.04)          |
| rs2719232        | 57048738        | A  | 0.4057  | 0.4646  | 0.1116   | 0.79 (0.58-1.06) | 0.1161                | 0.79 (0.59-1.06)          |
| rs10101914       | 57049241        | G  | 0.1618  | 0.2111  | 0.1058   | 0.72 (0.48-1.07) | 0.1128                | 0.73 (0.49-1.08)          |
| rs16922502       | 57049990        | A  | 0.1557  | 0.2089  | 0.07435  | 0.70 (0.47-1.04) | 0.07986               | 0.70 (0.48-1.04)          |
| rs2466007        | 57051741        | G  | 0.3726  | 0.4506  | 0.03488  | 0.72 (0.54-0.98) | 0.03701               | 0.73 (0.54-0.98)          |
| rs16922508       | 57054784        | G  | 0.2594  | 0.2549  | 0.8898   | 1.02 (0.73-1.43) | 0.8922                | 1.02 (0.74-1.42)          |
| rs7828483        | 57055442        | C  | 0.3274  | 0.2709  | 0.128    | 1.31 (0.92-1.86) | 0.1322                | 1.31 (0.92-1.84)          |
| rs2719246        | 57056975        | A  | 0.149   | 0.1594  | 0.7065   | 0.92 (0.61-1.40) | 0.706                 | 0.92 (0.61-1.40)          |
| <b>rs2667978</b> | 57060505        | G  | 0.184   | 0.2092  | 0.4009   | 0.85 (0.59-1.24) | 0.4052                | 0.85 (0.59-1.24)          |
| rs16920176       | 57061690        | G  | 0.07547 | 0.04276 | 0.03905  | 1.83 (1.02-3.27) | 0.04017               | 1.86 (1.03-3.35)          |
| rs16920186       | 57063272        | G  | 0.07547 | 0.04276 | 0.03905  | 1.83 (1.02-3.27) | 0.04017               | 1.86 (1.03-3.35)          |
| rs4061077        | 57065996        | A  | 0.2594  | 0.25    | 0.7701   | 1.05 (0.75-1.47) | 0.7749                | 1.05 (0.76-1.45)          |
| rs9650314        | 57066164        | A  | 0.184   | 0.2072  | 0.4375   | 0.86 (0.59-1.25) | 0.4425                | 0.86 (0.60-1.25)          |
| rs16920192       | 57066580        | A  | 0.2594  | 0.2512  | 0.8      | 1.04 (0.75-1.46) | 0.804                 | 1.04 (0.75-1.45)          |
| rs1912818        | 57066875        | C  | 0.2594  | 0.25    | 0.7701   | 1.05 (0.75-1.47) | 0.7749                | 1.05 (0.76-1.45)          |
| rs2719252        | 57067406        | G  | 0.2594  | 0.2483  | 0.7309   | 1.06 (0.76-1.48) | 0.7362                | 1.06 (0.76-1.47)          |
| rs2719253        | 57067720        | G  | 0.2594  | 0.25    | 0.7701   | 1.05 (0.75-1.47) | 0.7749                | 1.05 (0.76-1.45)          |
| rs2667974        | 57067931        | A  | 0.2594  | 0.2487  | 0.7406   | 1.06 (0.76-1.48) | 0.746                 | 1.06 (0.76-1.46)          |
| rs10282821       | 57068622        | A  | 0.1792  | 0.2031  | 0.4221   | 0.86 (0.59-1.25) | 0.4154                | 0.85 (0.58-1.25)          |
| rs2667972        | 57069215        | A  | 0.184   | 0.2072  | 0.4375   | 0.86 (0.59-1.25) | 0.4425                | 0.86 (0.60-1.25)          |
| rs2719243        | 57069530        | G  | 0.2594  | 0.2504  | 0.78     | 1.05 (0.75-1.46) | 0.7846                | 1.05 (0.76-1.45)          |
| rs2719242        | 57069786        | G  | 0.2594  | 0.2521  | 0.8198   | 1.04 (0.74-1.45) | 0.8232                | 1.04 (0.75-1.44)          |
| rs4738466        | 57073255        | G  | 0.1085  | 0.1343  | 0.3038   | 0.78 (0.49-1.25) | 0.3016                | 0.78 (0.49-1.25)          |
| rs3106348        | 57079720        | A  | 0.2594  | 0.2525  | 0.8296   | 1.04 (0.74-1.45) | 0.8321                | 1.04 (0.75-1.44)          |
| rs7824121        | 57084226        | G  | 0.1085  | 0.1337  | 0.3145   | 0.79 (0.50-1.25) | 0.3095                | 0.78 (0.49-1.25)          |

Supplemental Table 2e. Set 4: European-derived Female + Male (1960 cases/2806 ctrls)

| SNP              | BP              | MA | F_A     | F_U     | P               | OR (95% CI)             | PCA Corrected P-value | PCA Corrected OR (95% CI) |
|------------------|-----------------|----|---------|---------|-----------------|-------------------------|-----------------------|---------------------------|
| rs3808391        | 56953203        | G  | 0.4196  | 0.4141  | 0.5927          | 1.02 (0.94-1.11)        | 0.589                 | 1.02 (0.94-1.11)          |
| rs182832         | 56953415        | A  | 0.2156  | 0.1989  | 0.04628         | 1.11 (1.00-1.23)        | 0.04671               | 1.11 (1.00-1.22)          |
| rs6983130        | 56955793        | G  | 0.164   | 0.1877  | <b>0.003601</b> | <b>0.85 (0.76-0.95)</b> | <b>0.003156</b>       | <b>0.84 (0.76-0.94)</b>   |
| rs6474026        | 56956047        | G  | 0.1788  | 0.1973  | 0.02342         | 0.89 (0.80-0.98)        | 0.02298               | 0.89 (0.80-0.98)          |
| rs7834615        | 56959994        | G  | 0.4249  | 0.4223  | 0.8047          | 1.01 (0.93-1.10)        | 0.8033                | 1.01 (0.93-1.10)          |
| rs16922309       | 56963245        | G  | 0.04541 | 0.04492 | 0.91            | 1.01 (0.83-1.23)        | 0.9101                | 1.01 (0.83-1.23)          |
| rs333619         | 56964623        | A  | 0.4553  | 0.446   | 0.3679          | 1.04 (0.96-1.13)        | 0.3629                | 1.04 (0.96-1.13)          |
| rs7820484        | 56968031        | C  | 0.02782 | 0.02922 | 0.6863          | 0.95 (0.74-1.22)        | 0.683                 | 0.95 (0.74-1.22)          |
| rs7005312        | 56968993        | A  | 0.4869  | 0.4868  | 0.9937          | 1.00 (0.92-1.09)        | 0.9938                | 1.00 (0.92-1.09)          |
| rs1466138        | 56970495        | A  | 0.07474 | 0.08553 | 0.05767         | 0.86 (0.74-1.01)        | 0.06025               | 0.87 (0.75-1.01)          |
| rs7840325        | 56971216        | A  | 0.4406  | 0.4318  | 0.3934          | 1.04 (0.95-1.13)        | 0.3901                | 1.04 (0.95-1.13)          |
| rs9643489        | 56972210        | C  | 0.08402 | 0.09329 | 0.119           | 0.89 (0.77-1.03)        | 0.1206                | 0.89 (0.77-1.03)          |
| rs7831367        | 56973233        | G  | 0.08686 | 0.09406 | 0.2306          | 0.92 (0.79-1.06)        | 0.2312                | 0.92 (0.79-1.06)          |
| rs1980042        | 56975196        | G  | 0.4239  | 0.4239  | 0.9978          | 1.00 (0.92-1.09)        | 0.9979                | 1.00 (0.92-1.09)          |
| rs1027990        | 56976863        | G  | 0.4222  | 0.4234  | 0.9074          | 1.00 (0.92-1.08)        | 0.9072                | 1.00 (0.92-1.08)          |
| rs1027989        | 56976975        | C  | 0.0835  | 0.09297 | 0.1106          | 0.89 (0.77-1.03)        | 0.1123                | 0.89 (0.77-1.03)          |
| rs6474030        | 56980702        | C  | 0.1115  | 0.1172  | 0.3848          | 0.94 (0.83-1.07)        | 0.3839                | 0.94 (0.83-1.07)          |
| rs4551325        | 56985745        | G  | 0.3034  | 0.3295  | 0.007326        | 0.89 (0.81-0.97)        | 0.007298              | 0.89 (0.81-0.97)          |
| rs1397976        | 56987939        | A  | 0.3151  | 0.3407  | 0.008792        | 0.89 (0.82-0.97)        | 0.00891               | 0.89 (0.82-0.97)          |
| rs6474033        | 56988570        | A  | 0.1132  | 0.1173  | 0.5312          | 0.96 (0.84-1.09)        | 0.5297                | 0.96 (0.84-1.09)          |
| rs10095917       | 56992814        | A  | 0.2054  | 0.2258  | 0.01745         | 0.89 (0.80-0.98)        | 0.0182                | 0.89 (0.80-0.98)          |
| rs6985030        | 57007430        | A  | 0.1447  | 0.1613  | 0.02736         | 0.88 (0.78-0.99)        | 0.02763               | 0.88 (0.79-0.99)          |
| rs16922425       | 57008823        | A  | 0.5079  | 0.4875  | 0.05019         | 1.09 (1.00-1.18)        | 0.04996               | 1.09 (1.00-1.18)          |
| <b>rs7829816</b> | <b>57011940</b> | G  | 0.1873  | 0.2085  | 0.01122         | 0.88 (0.79-0.97)        | 0.01165               | 0.88 (0.79-0.97)          |
| rs2100245        | 57012654        | G  | 0.1962  | 0.2185  | 0.00849         | 0.87 (0.79-0.97)        | 0.008931              | 0.87 (0.79-0.97)          |
| rs16922459       | 57016726        | A  | 0.148   | 0.1664  | 0.01565         | 0.87 (0.78-0.97)        | 0.01612               | 0.87 (0.78-0.97)          |
| rs12334430       | 57022514        | T  | 0.1808  | 0.2021  | 0.009688        | 0.87 (0.79-0.97)        | 0.01029               | 0.87 (0.79-0.97)          |
| rs16922463       | 57024223        | A  | 0.1797  | 0.2008  | 0.009968        | 0.87 (0.79-0.97)        | 0.01059               | 0.87 (0.79-0.97)          |
| rs7813271        | 57025705        | G  | 0.1798  | 0.2006  | 0.01122         | 0.87 (0.79-0.97)        | 0.0119                | 0.88 (0.79-0.97)          |
| rs2292419        | 57029334        | G  | 0.2997  | 0.2981  | 0.8639          | 1.01 (0.92-1.10)        | 0.864                 | 1.01 (0.92-1.10)          |
| rs10089932       | 57029511        | G  | 0.2974  | 0.2995  | 0.8324          | 0.99 (0.91-1.08)        | 0.8324                | 0.99 (0.91-1.08)          |
| rs7828258        | 57030499        | G  | 0.5079  | 0.4872  | 0.04631         | 1.09 (1.00-1.18)        | 0.047                 | 1.09 (1.00-1.18)          |
| rs2668017        | 57032420        | A  | 0.2531  | 0.2596  | 0.4707          | 0.97 (0.88-1.06)        | 0.4713                | 0.97 (0.88-1.06)          |
| rs2719240        | 57032602        | C  | 0.2846  | 0.2946  | 0.2903          | 0.95 (0.87-1.04)        | 0.2914                | 0.95 (0.87-1.04)          |
| rs2719268        | 57034636        | G  | 0.2519  | 0.2596  | 0.3962          | 0.96 (0.87-1.06)        | 0.3964                | 0.96 (0.87-1.06)          |
| rs2668021        | 57036101        | G  | 0.2375  | 0.2561  | 0.03908         | 0.90 (0.82-1.00)        | 0.04081               | 0.91 (0.82-1.00)          |
| rs12114560       | 57037042        | A  | 0.03699 | 0.03956 | 0.5213          | 0.93 (0.75-1.15)        | 0.5237                | 0.93 (0.75-1.15)          |
| rs2719266        | 57037257        | A  | 0.4297  | 0.4509  | 0.04007         | 0.92 (0.84-1.00)        | 0.04144               | 0.92 (0.85-1.00)          |
| rs2719265        | 57037831        | A  | 0.4351  | 0.4563  | 0.04063         | 0.92 (0.85-1.00)        | 0.04231               | 0.92 (0.85-1.00)          |
| rs907425         | 57038845        | G  | 0.4495  | 0.4709  | 0.03882         | 0.92 (0.85-1.00)        | 0.04026               | 0.92 (0.85-1.00)          |
| rs1877301        | 57039144        | A  | 0.4342  | 0.4563  | 0.0324          | 0.91 (0.84-0.99)        | 0.03371               | 0.92 (0.84-0.99)          |
| rs868541         | 57039314        | A  | 0.4344  | 0.4569  | 0.03029         | 0.91 (0.84-0.99)        | 0.03156               | 0.91 (0.84-0.99)          |
| rs13257714       | 57040111        | A  | 0.2052  | 0.2076  | 0.7732          | 0.99 (0.89-1.09)        | 0.7726                | 0.99 (0.89-1.09)          |
| rs2667985        | 57042912        | C  | 0.1177  | 0.1344  | 0.01593         | 0.86 (0.76-0.97)        | 0.01588               | 0.86 (0.76-0.97)          |
| rs1027987        | 57044737        | G  | 0.4344  | 0.4565  | 0.03277         | 0.91 (0.84-0.99)        | 0.03412               | 0.92 (0.84-0.99)          |
| rs1027986        | 57045025        | G  | 0.4344  | 0.4565  | 0.03288         | 0.91 (0.84-0.99)        | 0.03419               | 0.92 (0.84-0.99)          |
| rs907423         | 57046172        | C  | 0.4317  | 0.4532  | 0.03912         | 0.92 (0.84-1.00)        | 0.04106               | 0.92 (0.85-1.00)          |
| rs952784         | 57046643        | A  | 0.2057  | 0.2084  | 0.7526          | 0.98 (0.89-1.09)        | 0.752                 | 0.98 (0.89-1.09)          |
| rs7838485        | 57048155        | C  | 0.2051  | 0.2081  | 0.7199          | 0.98 (0.89-1.09)        | 0.7192                | 0.98 (0.89-1.09)          |
| rs2719232        | 57048738        | A  | 0.4337  | 0.4567  | 0.02609         | 0.91 (0.84-0.99)        | 0.02734               | 0.91 (0.84-0.99)          |
| rs10101914       | 57049241        | G  | 0.2088  | 0.2098  | 0.9052          | 0.99 (0.90-1.10)        | 0.9048                | 0.99 (0.90-1.10)          |
| rs16922502       | 57049990        | A  | 0.2053  | 0.2078  | 0.7707          | 0.99 (0.89-1.09)        | 0.7699                | 0.99 (0.89-1.09)          |
| rs2466007        | 57051741        | G  | 0.4286  | 0.4458  | 0.09554         | 0.93 (0.86-1.01)        | 0.0983                | 0.93 (0.86-1.01)          |
| rs16922508       | 57054784        | G  | 0.2393  | 0.2537  | 0.1075          | 0.93 (0.84-1.02)        | 0.1099                | 0.93 (0.84-1.02)          |
| rs7828483        | 57055442        | C  | 0.2624  | 0.2795  | 0.08061         | 0.92 (0.83-1.01)        | 0.07795               | 0.92 (0.83-1.01)          |
| rs2719246        | 57056975        | a  | 0.147   | 0.1603  | 0.08366         | 0.90 (0.80-1.01)        | 0.08863               | 0.91 (0.81-1.02)          |
| <b>rs2667978</b> | 57060505        | G  | 0.1969  | 0.2112  | 0.09088         | 0.92 (0.83-1.01)        | 0.09205               | 0.92 (0.83-1.01)          |
| rs16920176       | 57061690        | G  | 0.04082 | 0.04152 | 0.8653          | 0.98 (0.80-1.21)        | 0.8664                | 0.98 (0.80-1.21)          |
| rs16920186       | 57063272        | G  | 0.04082 | 0.04152 | 0.8653          | 0.98 (0.80-1.21)        | 0.8664                | 0.98 (0.80-1.21)          |
| rs4061077        | 57065996        | A  | 0.2372  | 0.2512  | 0.118           | 0.93 (0.84-1.02)        | 0.1204                | 0.93 (0.84-1.02)          |
| rs9650314        | 57066164        | A  | 0.1968  | 0.2099  | 0.1181          | 0.92 (0.83-1.02)        | 0.1205                | 0.92 (0.83-1.02)          |
| rs16920192       | 57066580        | A  | 0.2371  | 0.2513  | 0.1124          | 0.93 (0.84-1.02)        | 0.1145                | 0.93 (0.84-1.02)          |
| rs1912818        | 57066875        | C  | 0.2371  | 0.2511  | 0.1187          | 0.93 (0.84-1.02)        | 0.1212                | 0.93 (0.84-1.02)          |
| rs2719252        | 57067406        | G  | 0.2354  | 0.2496  | 0.1135          | 0.93 (0.84-1.02)        | 0.1159                | 0.93 (0.84-1.02)          |
| rs2719253        | 57067720        | G  | 0.2372  | 0.2512  | 0.118           | 0.93 (0.84-1.02)        | 0.1204                | 0.93 (0.84-1.02)          |
| rs2667974        | 57067931        | A  | 0.2315  | 0.2494  | 0.04785         | 0.91 (0.82-1.00)        | 0.05065               | 0.91 (0.83-1.00)          |
| rs10282821       | 57068622        | A  | 0.2148  | 0.2108  | 0.6387          | 1.02 (0.93-1.13)        | 0.6381                | 1.02 (0.93-1.13)          |
| rs2667972        | 57069215        | A  | 0.1964  | 0.2099  | 0.1083          | 0.92 (0.83-1.02)        | 0.1102                | 0.92 (0.83-1.02)          |
| rs2719243        | 57069530        | G  | 0.2372  | 0.2512  | 0.118           | 0.93 (0.84-1.02)        | 0.1204                | 0.93 (0.84-1.02)          |
| rs2719242        | 57069786        | G  | 0.2383  | 0.2527  | 0.1084          | 0.93 (0.84-1.02)        | 0.1104                | 0.93 (0.84-1.02)          |
| rs4738466        | 57073255        | G  | 0.1198  | 0.1371  | 0.01342         | 0.86 (0.76-0.97)        | 0.01322               | 0.86 (0.76-0.97)          |
| rs3106348        | 57079720        | A  | 0.2434  | 0.2538  | 0.2454          | 0.95 (0.86-1.04)        | 0.2473                | 0.95 (0.86-1.04)          |
| rs7824121        | 57084226        | G  | 0.1189  | 0.1353  | 0.01814         | 0.86 (0.76-0.98)        | 0.01773               | 0.86 (0.76-0.97)          |

**Supplemental Table 2f. Set 5: Independent European Confirmatory Set (1400 cases/1595 ctrls)**

| <b>SNP</b> | <b>BP</b> | <b>MA</b> | <b>F_A</b> | <b>F_U</b> | <b>P</b> | <b>OR (95% CI)</b> |
|------------|-----------|-----------|------------|------------|----------|--------------------|
| rs16922441 | 57013886  | G         | 0.17       | 0.17       | 0.8166   | 1.02 (0.89 - 1.16) |
| rs12334430 | 57022514  | T         | 0.22       | 0.21       | 0.7884   | 1.02 (0.90 - 1.15) |
| rs7813271  | 57025705  | G         | 0.20       | 0.20       | 0.9524   | 1.00 (0.88 - 1.14) |

Supplemental Table 2g. Set 6 Independent AA (582 cases/750 ctrls)

| SNP              | BP              | MA | F_A  | F_U  | P       | OR (95% CI)      |
|------------------|-----------------|----|------|------|---------|------------------|
| rs3808391        | 56953203        | G  | 0.42 | 0.42 | 0.7556  | 0.98 (0.84-1.14) |
| rs182832         | 56953415        | A  | 0.09 | 0.09 | 0.9696  | 1.01 (0.77-1.32) |
| rs6983130        | 56955793        | G  | 0.16 | 0.15 | 0.4917  | 1.08 (0.87-1.33) |
| rs6474026        | 56956047        | G  | 0.17 | 0.16 | 0.4178  | 1.09 (0.89-1.34) |
| rs7834615        | 56959994        | A  | 0.48 | 0.49 | 0.8636  | 0.99 (0.85-1.15) |
| rs16922309       | 56963245        | G  | 0.13 | 0.13 | 0.795   | 0.97 (0.77-1.22) |
| rs333619         | 56964623        | A  | 0.43 | 0.43 | 0.9058  | 0.99 (0.85-1.16) |
| rs7820484        | 56968031        | C  | 0.15 | 0.15 | 0.7299  | 1.04 (0.84-1.29) |
| rs7005312        | 56968993        | A  | 0.40 | 0.41 | 0.624   | 0.96 (0.82-1.13) |
| rs1466138        | 56970495        | A  | 0.16 | 0.14 | 0.3504  | 1.11 (0.89-1.37) |
| rs7840325        | 56971216        | A  | 0.28 | 0.29 | 0.4394  | 0.94 (0.79-1.11) |
| rs9643489        | 56972210        | C  | 0.12 | 0.12 | 0.9237  | 0.99 (0.78-1.25) |
| rs7831367        | 56973233        | G  | 0.21 | 0.21 | 0.8691  | 1.02 (0.84-1.23) |
| rs1980042        | 56975196        | G  | 0.48 | 0.48 | 0.9719  | 1 (0.85-1.16)    |
| rs1027990        | 56976863        | G  | 0.42 | 0.42 | 0.9459  | 0.99 (0.85-1.16) |
| rs1027989        | 56976975        | C  | 0.08 | 0.09 | 0.7355  | 0.95 (0.72-1.26) |
| rs6474030        | 56980702        | C  | 0.03 | 0.03 | 0.7578  | 1.07 (0.7-1.65)  |
| rs4551325        | 56985745        | G  | 0.32 | 0.32 | 0.9833  | 1 (0.85-1.18)    |
| rs1397976        | 56987939        | A  | 0.41 | 0.39 | 0.3132  | 1.08 (0.93-1.27) |
| rs6474033        | 56988570        | A  | 0.04 | 0.05 | 0.6611  | 0.92 (0.64-1.33) |
| rs10095917       | 56992814        | A  | 0.37 | 0.34 | 0.1466  | 1.13 (0.96-1.32) |
| rs6985030        | 57007430        | A  | 0.25 | 0.23 | 0.3651  | 1.09 (0.91-1.3)  |
| rs16922425       | 57008823        | A  | 0.47 | 0.48 | 0.5226  | 0.95 (0.82-1.11) |
| <b>rs7829816</b> | <b>57011940</b> | G  | 0.48 | 0.48 | 0.8607  | 1.01 (0.87-1.18) |
| rs2100245        | 57012654        | A  | 0.44 | 0.46 | 0.3141  | 0.92 (0.79-1.08) |
| rs16922459       | 57016726        | A  | 0.20 | 0.18 | 0.2187  | 1.13 (0.93-1.38) |
| rs12334430       | 57022514        | A  | 0.48 | 0.48 | 0.9935  | 1 (0.86-1.17)    |
| rs16922463       | 57024223        | A  | 0.42 | 0.42 | 0.8643  | 0.99 (0.84-1.15) |
| rs7813271        | 57025705        | G  | 0.41 | 0.42 | 0.913   | 0.99 (0.85-1.16) |
| rs2292419        | 57029334        | G  | 0.06 | 0.06 | 0.6922  | 0.94 (0.67-1.3)  |
| rs10089932       | 57029511        | G  | 0.06 | 0.06 | 0.7465  | 0.95 (0.68-1.32) |
| rs7828258        | 57030499        | A  | 0.50 | 0.50 | 0.8801  | 1.01 (0.87-1.18) |
| rs2668017        | 57032420        | A  | 0.13 | 0.13 | 0.7848  | 0.97 (0.77-1.22) |
| rs2719240        | 57032602        | C  | 0.45 | 0.45 | 0.7686  | 1.02 (0.88-1.19) |
| rs2719268        | 57034636        | G  | 0.09 | 0.09 | 0.7679  | 0.96 (0.74-1.25) |
| rs2668021        | 57036101        | G  | 0.37 | 0.36 | 0.6725  | 1.04 (0.88-1.21) |
| rs12114560       | 57037042        | A  | 0.11 | 0.12 | 0.3384  | 0.89 (0.7-1.13)  |
| rs2719266        | 57037257        | A  | 0.45 | 0.45 | 0.6491  | 0.96 (0.83-1.13) |
| rs2719265        | 57037831        | A  | 0.45 | 0.45 | 0.7208  | 0.97 (0.83-1.13) |
| rs907425         | 57038845        | A  | 0.32 | 0.33 | 0.7272  | 0.97 (0.82-1.14) |
| rs1877301        | 57039144        | A  | 0.45 | 0.45 | 0.6731  | 0.97 (0.83-1.13) |
| rs868541         | 57039314        | G  | 0.40 | 0.40 | 0.93    | 1.01 (0.86-1.18) |
| rs13257714       | 57040111        | A  | 0.09 | 0.09 | 0.771   | 0.96 (0.73-1.26) |
| rs2667985        | 57042912        | C  | 0.03 | 0.02 | 0.01449 | 1.85 (1.12-3.04) |
| rs1027987        | 57044737        | G  | 0.45 | 0.45 | 0.6832  | 0.97 (0.83-1.13) |
| rs1027986        | 57045025        | G  | 0.45 | 0.45 | 0.6735  | 0.97 (0.83-1.13) |
| rs907423         | 57046172        | C  | 0.44 | 0.45 | 0.7821  | 0.98 (0.84-1.14) |
| rs952784         | 57046643        | A  | 0.24 | 0.25 | 0.702   | 0.97 (0.81-1.15) |
| rs7838485        | 57048155        | C  | 0.23 | 0.23 | 0.8875  | 0.99 (0.82-1.19) |
| rs2719232        | 57048738        | G  | 0.40 | 0.39 | 0.6614  | 1.04 (0.89-1.21) |
| rs10101914       | 57049241        | G  | 0.34 | 0.34 | 0.9937  | 1 (0.85-1.18)    |
| rs16922502       | 57049990        | A  | 0.27 | 0.27 | 0.7887  | 1.02 (0.86-1.22) |
| rs2466007        | 57051741        | A  | 0.32 | 0.33 | 0.6257  | 0.96 (0.82-1.13) |
| rs16922508       | 57054784        | A  | 0.51 | 0.50 | 0.5124  | 1.05 (0.9-1.23)  |
| rs7828483        | 57055442        | G  | 0.46 | 0.48 | 0.5054  | 0.95 (0.81-1.11) |
| rs2719246        | 57056975        | a  | 0.03 | 0.03 | 0.9217  | 0.98 (0.61-1.56) |
| <b>rs2667978</b> | 57060505        | G  | 0.15 | 0.14 | 0.9809  | 1 (0.81-1.25)    |
| rs16920176       | 57061690        | G  | 0.25 | 0.28 | 0.09535 | 0.86 (0.72-1.03) |
| rs16920186       | 57063272        | G  | 0.25 | 0.28 | 0.1014  | 0.86 (0.73-1.03) |
| rs4061077        | 57065996        | A  | 0.32 | 0.34 | 0.1529  | 0.89 (0.75-1.05) |
| rs9650314        | 57066164        | A  | 0.04 | 0.04 | 0.8274  | 0.96 (0.63-1.44) |
| rs16920192       | 57066580        | A  | 0.32 | 0.34 | 0.1874  | 0.9 (0.76-1.06)  |
| rs1912818        | 57066875        | C  | 0.32 | 0.34 | 0.2268  | 0.9 (0.77-1.07)  |
| rs2719252        | 57067406        | G  | 0.31 | 0.34 | 0.2205  | 0.9 (0.77-1.06)  |
| rs2719253        | 57067720        | G  | 0.32 | 0.34 | 0.2041  | 0.9 (0.76-1.06)  |
| rs2667974        | 57067931        | A  | 0.30 | 0.33 | 0.1081  | 0.87 (0.73-1.03) |
| rs10282821       | 57068622        | A  | 0.04 | 0.04 | 0.8649  | 0.97 (0.64-1.45) |
| rs2667972        | 57069215        | A  | 0.03 | 0.03 | 0.5691  | 0.88 (0.57-1.36) |
| rs2719243        | 57069530        | G  | 0.32 | 0.34 | 0.1782  | 0.89 (0.76-1.05) |
| rs2719242        | 57069786        | G  | 0.43 | 0.45 | 0.2867  | 0.92 (0.79-1.07) |
| rs4738466        | 57073255        | G  | 0.08 | 0.06 | 0.05673 | 1.35 (0.99-1.83) |
| rs3106348        | 57079720        | A  | 0.39 | 0.41 | 0.2199  | 0.91 (0.78-1.06) |
| rs7824121        | 57084226        | G  | 0.03 | 0.02 | 0.05303 | 1.59 (0.99-2.55) |

Supplemental Table 2h. Set 7 Independent Korean (661 cases/781 ctrls)

| SNP              | BP              | MA | F_A  | F_U  | P       | OR (95% CI)        |
|------------------|-----------------|----|------|------|---------|--------------------|
| rs3808391        | 56953203        | A  | 0.36 | 0.36 | 0.7768  | 0.98 (0.84 - 1.14) |
| rs182832         | 56953415        | A  | 0.14 | 0.16 | 0.3804  | 0.91 (0.74 - 1.12) |
| rs6983130        | 56955793        | G  | 0.07 | 0.06 | 0.2625  | 1.19 (0.88 - 1.61) |
| rs6474026        | 56956047        | G  | 0.09 | 0.07 | 0.07683 | 1.27 (0.97 - 1.65) |
| rs7834615        | 56959994        | A  | 0.28 | 0.30 | 0.1589  | 0.89 (0.76 - 1.05) |
| rs16922309       | 56963245        | G  | 0.00 | 0.00 | 0.3139  | 0.51 (0.13 - 1.96) |
| rs333619         | 56964623        | T  | 0.17 | 0.19 | 0.1193  | 0.86 (0.71 - 1.04) |
| rs7820484        | 56968031        | C  | 0.11 | 0.13 | 0.2427  | 0.87 (0.70 - 1.10) |
| rs7005312        | 56968993        | A  | 0.16 | 0.18 | 0.2462  | 0.89 (0.73 - 1.09) |
| rs1466138        | 56970495        | A  | 0.03 | 0.02 | 0.2284  | 1.32 (0.84 - 2.09) |
| rs7840325        | 56971216        | T  | 0.30 | 0.33 | 0.1054  | 0.88 (0.75 - 1.03) |
| rs9643489        | 56972210        | C  | 0.03 | 0.02 | 0.2284  | 1.32 (0.84 - 2.09) |
| rs7831367        | 56973233        | G  | 0.03 | 0.02 | 0.2284  | 1.32 (0.84 - 2.09) |
| rs1980042        | 56975196        | G  | 0.16 | 0.18 | 0.1127  | 0.85 (0.70 - 1.04) |
| rs1027990        | 56976863        | G  | 0.16 | 0.18 | 0.1657  | 0.87 (0.71 - 1.06) |
| rs1027989        | 56976975        | C  | 0.03 | 0.02 | 0.2284  | 1.32 (0.84 - 2.09) |
| rs6474030        | 56980702        | C  | 0.02 | 0.02 | 0.3671  | 1.28 (0.75 - 2.17) |
| rs4551325        | 56985745        | G  | 0.05 | 0.05 | 0.9246  | 0.98 (0.70 - 1.38) |
| rs1397976        | 56987939        | A  | 0.05 | 0.05 | 0.9246  | 0.98 (0.70 - 1.38) |
| rs6474033        | 56988570        | A  | 0.02 | 0.02 | 0.3635  | 1.27 (0.76 - 2.14) |
| rs10095917       | 56992814        | A  | 0.03 | 0.03 | 0.3812  | 0.82 (0.53 - 1.28) |
| rs16922425       | 57008823        | G  | 0.26 | 0.26 | 0.896   | 1.01 (0.86 - 1.19) |
| <b>rs7829816</b> | <b>57011940</b> | G  | 0.03 | 0.03 | 0.2312  | 0.77 (0.49 - 1.19) |
| rs2100245        | 57012654        | G  | 0.03 | 0.03 | 0.2336  | 0.77 (0.49 - 1.19) |
| rs12334430       | 57022514        | T  | 0.03 | 0.03 | 0.2728  | 0.78 (0.50 - 1.22) |
| rs16922463       | 57024223        | A  | 0.03 | 0.03 | 0.3139  | 0.80 (0.51 - 1.24) |
| rs7813271        | 57025705        | G  | 0.03 | 0.03 | 0.2728  | 0.78 (0.50 - 1.22) |
| rs2292419        | 57029334        | G  | 0.29 | 0.30 | 0.3292  | 0.92 (0.79 - 1.08) |
| rs10089932       | 57029511        | G  | 0.29 | 0.31 | 0.2937  | 0.92 (0.78 - 1.08) |
| rs7828258        | 57030499        | A  | 0.25 | 0.26 | 0.3335  | 0.92 (0.78 - 1.09) |
| rs2668017        | 57032420        | A  | 0.24 | 0.26 | 0.3177  | 0.92 (0.78 - 1.09) |
| rs2719240        | 57032602        | C  | 0.25 | 0.26 | 0.3335  | 0.92 (0.78 - 1.09) |
| rs2719268        | 57034636        | G  | 0.23 | 0.24 | 0.5026  | 0.94 (0.79 - 1.12) |
| rs2668021        | 57036101        | G  | 0.00 | 0.00 | 0.7914  | 1.18 (0.34 - 4.09) |
| rs12114560       | 57037042        | A  | 0.00 | 0.00 | 0.7914  | 1.18 (0.34 - 4.09) |
| rs2719266        | 57037257        | A  | 0.25 | 0.27 | 0.2929  | 0.91 (0.77 - 1.08) |
| rs2719265        | 57037831        | A  | 0.25 | 0.27 | 0.2652  | 0.91 (0.77 - 1.08) |
| rs907425         | 57038845        | G  | 0.25 | 0.27 | 0.2652  | 0.91 (0.77 - 1.08) |
| rs1877301        | 57039144        | A  | 0.25 | 0.27 | 0.2652  | 0.91 (0.77 - 1.08) |
| rs868541         | 57039314        | A  | 0.25 | 0.27 | 0.2652  | 0.91 (0.77 - 1.08) |
| rs13257714       | 57040111        | A  | 0.22 | 0.23 | 0.4048  | 0.93 (0.78 - 1.11) |
| rs2667985        | 57042912        | C  | 0.02 | 0.02 | 0.6561  | 1.12 (0.69 - 1.81) |
| rs1027987        | 57044737        | G  | 0.23 | 0.24 | 0.4677  | 0.94 (0.79 - 1.11) |
| rs1027986        | 57045025        | G  | 0.23 | 0.24 | 0.4677  | 0.94 (0.79 - 1.11) |
| rs907423         | 57046172        | C  | 0.23 | 0.24 | 0.5164  | 0.94 (0.79 - 1.12) |
| rs952784         | 57046643        | A  | 0.23 | 0.24 | 0.4153  | 0.93 (0.78 - 1.11) |
| rs7838485        | 57048155        | C  | 0.23 | 0.24 | 0.4434  | 0.93 (0.79 - 1.11) |
| rs2719232        | 57048738        | A  | 0.23 | 0.24 | 0.4389  | 0.93 (0.79 - 1.11) |
| rs10101914       | 57049241        | G  | 0.23 | 0.24 | 0.3482  | 0.92 (0.77 - 1.10) |
| rs16922502       | 57049990        | A  | 0.23 | 0.24 | 0.3838  | 0.93 (0.78 - 1.10) |
| rs2466007        | 57051741        | G  | 0.23 | 0.24 | 0.3961  | 0.93 (0.78 - 1.10) |
| rs16922508       | 57054784        | G  | 0.03 | 0.04 | 0.5312  | 0.88 (0.58 - 1.32) |
| rs16920176       | 57061690        | G  | 0.03 | 0.04 | 0.5312  | 0.88 (0.58 - 1.32) |
| rs16920186       | 57063272        | G  | 0.03 | 0.04 | 0.5312  | 0.88 (0.58 - 1.32) |
| rs4061077        | 57065996        | A  | 0.03 | 0.04 | 0.5312  | 0.88 (0.58 - 1.32) |
| rs16920192       | 57066580        | A  | 0.03 | 0.03 | 0.5157  | 0.87 (0.58 - 1.32) |
| rs1912818        | 57066875        | C  | 0.03 | 0.03 | 0.5226  | 0.87 (0.58 - 1.32) |
| rs2719252        | 57067406        | G  | 0.03 | 0.03 | 0.5157  | 0.87 (0.58 - 1.32) |
| rs2719253        | 57067720        | G  | 0.03 | 0.03 | 0.5157  | 0.87 (0.58 - 1.32) |
| rs2667974        | 57067931        | A  | 0.03 | 0.03 | 0.4621  | 0.85 (0.56 - 1.30) |
| rs10282821       | 57068622        | A  | 0.24 | 0.25 | 0.5595  | 0.95 (0.80 - 1.13) |
| rs2719243        | 57069530        | G  | 0.03 | 0.03 | 0.5157  | 0.87 (0.58 - 1.32) |
| rs2719242        | 57069786        | G  | 0.03 | 0.03 | 0.5157  | 0.87 (0.58 - 1.32) |
| rs4738466        | 57073255        | G  | 0.02 | 0.02 | 0.5703  | 1.15 (0.71 - 1.87) |
| rs3106348        | 57079720        | A  | 0.03 | 0.03 | 0.5157  | 0.87 (0.58 - 1.32) |
| rs7824121        | 57084226        | G  | 0.03 | 0.02 | 0.4859  | 1.19 (0.73 - 1.92) |

Supplemental Table 2i. Maximum Independent Cases and Controls Tested (Overall Association)

| SNP              | European Ancestry Females |                 |                           |                 | European American Females |                           |                 |
|------------------|---------------------------|-----------------|---------------------------|-----------------|---------------------------|---------------------------|-----------------|
|                  | BP                        | P               | OR (95% CI)               | # cases/# ctrls | P                         | OR (95% CI)               | # cases/# ctrls |
| rs182832         | 56953415                  | 0.2372          | 1.07 (0.96 - 1.19)        | 2174/2025       | 0.4331                    | 1.05 (0.93 - 1.18)        | 1783/1649       |
| <b>rs6983130</b> | <b>56955793</b>           | <b>0.000111</b> | <b>0.81 (0.73 - 0.90)</b> | 2254/2228       | <b>0.0002056</b>          | <b>0.80 (0.71 - 0.90)</b> | 1863/1852       |
| rs6474026        | 56956047                  | 0.005326        | 0.86 (0.77 - 0.96)        | 2174/2025       | 0.01334                   | 0.86 (0.76 - 0.97)        | 1783/1649       |
| rs16922309       | 56963245                  | 0.4168          | 0.92 (0.75 - 1.13)        | 2156/1999       | 0.4501                    | 0.89 (0.70 - 1.12)        | 1545/1593       |
| rs333619         | 56964623                  | 0.06346         | 1.09 (1.00 - 1.18)        | 2156/1999       | 0.1356                    | 1.08 (0.98 - 1.19)        | 1545/1593       |
| rs7820484        | 56968031                  | 0.8538          | 1.03 (0.78 - 1.34)        | 2156/1999       | 0.7354                    | 1.02 (0.75 - 1.39)        | 1545/1593       |
| rs7005312        | 56968993                  | 0.3568          | 0.96 (0.88 - 1.05)        | 2156/1999       | 0.7505                    | 0.98 (0.89 - 1.09)        | 1545/1593       |
| rs1466138        | 56970495                  | 0.1819          | 0.90 (0.76 - 1.05)        | 2156/1999       | 0.2801                    | 0.90 (0.75 - 1.08)        | 1545/1593       |
| rs7840325        | 56971216                  | 0.1793          | 1.06 (0.97 - 1.16)        | 2156/1999       | 0.3641                    | 1.05 (0.95 - 1.16)        | 1545/1593       |
| rs7831367        | 56973233                  | 0.4883          | 0.95 (0.81 - 1.10)        | 2156/1999       | 0.3465                    | 0.93 (0.78 - 1.10)        | 1545/1593       |
| rs1980042        | 56975196                  | 0.1866          | 0.94 (0.86 - 1.03)        | 2156/1999       | 0.4153                    | 0.95 (0.86 - 1.05)        | 1545/1593       |
| rs1027990        | 56976863                  | 0.1542          | 0.94 (0.86 - 1.02)        | 2156/1999       | 0.3247                    | 0.94 (0.85 - 1.04)        | 1545/1593       |
| rs1027989        | 56976975                  | 0.4701          | 0.95 (0.82 - 1.10)        | 2246/2226       | 0.2928                    | 0.92 (0.78 - 1.08)        | 1855/1850       |
| rs6474030        | 56980702                  | 0.5634          | 0.96 (0.84 - 1.10)        | 2156/1999       | 0.4459                    | 0.95 (0.81 - 1.11)        | 1545/1593       |
| rs4551325        | 56985745                  | 0.005079        | 0.88 (0.80 - 0.96)        | 2156/1999       | 0.005996                  | 0.87 (0.78 - 0.97)        | 1545/1593       |
| rs1397976        | 56987939                  | 0.006796        | 0.88 (0.80 - 0.97)        | 2156/1999       | 0.0115                    | 0.87 (0.79 - 0.97)        | 1545/1593       |
| rs6474033        | 56988570                  | 0.7258          | 0.98 (0.85 - 1.12)        | 2156/1999       | 0.6588                    | 0.98 (0.84 - 1.15)        | 1545/1593       |
| rs10095917       | 56992814                  | 0.019           | 0.89 (0.80 - 0.98)        | 2254/2228       | 0.1297                    | 0.92 (0.82 - 1.03)        | 1863/1852       |
| rs6985030        | 57007430                  | 0.009595        | 0.85 (0.76 - 0.96)        | 2156/1999       | 0.08973                   | 0.88 (0.77 - 1.01)        | 1545/1593       |
| rs16922425       | 57008823                  | 0.3089          | 1.05 (0.96 - 1.14)        | 2156/1999       | 0.4804                    | 1.04 (0.94 - 1.14)        | 1545/1593       |
| rs7829816        | 57011940                  | 0.002802        | 0.85 (0.76 - 0.95)        | 2174/2025       | 0.04666                   | 0.89 (0.79 - 1.00)        | 1783/1649       |
| rs2100245        | 57012654                  | 0.004572        | 0.86 (0.77 - 0.95)        | 2174/2025       | 0.05742                   | 0.89 (0.80 - 1.00)        | 1783/1649       |
| rs16922459       | 57016726                  | 0.005438        | 0.85 (0.75 - 0.95)        | 2156/1999       | 0.03203                   | 0.86 (0.75 - 0.98)        | 1545/1593       |
| rs16922463       | 57024223                  | 0.0045          | 0.85 (0.77 - 0.95)        | 2156/1999       | 0.03558                   | 0.87 (0.77 - 0.99)        | 1545/1593       |
| rs7813271        | 57025705                  | 0.005987        | 0.86 (0.78 - 0.96)        | 2254/2228       | 0.07473                   | 0.90 (0.80 - 1.01)        | 1863/1852       |
| rs2292419        | 57029334                  | 0.09292         | 1.08 (0.99 - 1.18)        | 2246/2226       | 0.0809                    | 1.09 (0.99 - 1.21)        | 1855/1850       |
| rs10089932       | 57029511                  | 0.3604          | 1.05 (0.95 - 1.15)        | 2156/1999       | 0.5032                    | 1.05 (0.94 - 1.17)        | 1545/1593       |
| rs7828258        | 57030499                  | 0.1984          | 1.06 (0.97 - 1.15)        | 2156/1999       | 0.3576                    | 1.05 (0.95 - 1.16)        | 1545/1593       |
| rs2668017        | 57032420                  | 0.4579          | 1.04 (0.94 - 1.14)        | 2246/2226       | 0.6066                    | 1.03 (0.93 - 1.14)        | 1855/1850       |
| rs2719240        | 57032602                  | 0.9939          | 1.00 (0.91 - 1.10)        | 2156/1999       | 0.8976                    | 1.01 (0.90 - 1.12)        | 1545/1593       |
| rs2719268        | 57034636                  | 0.8428          | 1.01 (0.92 - 1.11)        | 2156/1999       | 0.9763                    | 1.01 (0.90 - 1.13)        | 1545/1593       |
| rs2668021        | 57036101                  | 0.02379         | 0.90 (0.81 - 0.99)        | 2254/2228       | 0.172                     | 0.93 (0.84 - 1.03)        | 1863/1852       |
| rs12114560       | 57037042                  | 0.5373          | 0.93 (0.74 - 1.17)        | 2156/1999       | 0.9398                    | 1.00 (0.77 - 1.30)        | 1545/1593       |
| rs2719266        | 57037257                  | 0.08279         | 0.93 (0.85 - 1.01)        | 2174/2025       | 0.1997                    | 0.94 (0.85 - 1.03)        | 1783/1649       |
| rs2719265        | 57037831                  | 0.09851         | 0.93 (0.85 - 1.01)        | 2174/2025       | 0.2187                    | 0.94 (0.86 - 1.04)        | 1783/1649       |
| rs907425         | 57038845                  | 0.09692         | 0.93 (0.85 - 1.01)        | 2156/1999       | 0.2309                    | 0.93 (0.84 - 1.03)        | 1545/1593       |
| rs1877301        | 57039144                  | 0.07897         | 0.93 (0.85 - 1.01)        | 2174/2025       | 0.1859                    | 0.94 (0.85 - 1.03)        | 1783/1649       |
| rs868541         | 57039314                  | 0.07557         | 0.92 (0.85 - 1.01)        | 2156/1999       | 0.2067                    | 0.93 (0.84 - 1.03)        | 1545/1593       |
| rs13257714       | 57040111                  | 0.6529          | 1.03 (0.92 - 1.14)        | 2156/1999       | 0.6416                    | 0.98 (0.87 - 1.11)        | 1545/1593       |
| rs2667985        | 57042912                  | 0.1078          | 0.90 (0.79 - 1.02)        | 2156/1999       | 0.03581                   | 0.87 (0.75 - 1.01)        | 1545/1593       |
| rs1027987        | 57044737                  | 0.07922         | 0.93 (0.85 - 1.01)        | 2156/1999       | 0.252                     | 0.94 (0.85 - 1.04)        | 1545/1593       |
| rs1027986        | 57045025                  | 0.07968         | 0.93 (0.85 - 1.01)        | 2156/1999       | 0.251                     | 0.94 (0.85 - 1.04)        | 1545/1593       |
| rs907423         | 57046172                  | 0.073           | 0.92 (0.85 - 1.01)        | 2156/1999       | 0.2648                    | 0.94 (0.85 - 1.04)        | 1545/1593       |
| rs952784         | 57046643                  | 0.6311          | 1.03 (0.92 - 1.14)        | 2174/2025       | 0.9367                    | 1.01 (0.89 - 1.13)        | 1783/1649       |
| rs7838485        | 57048155                  | 0.6989          | 1.02 (0.92 - 1.14)        | 2156/1999       | 0.5096                    | 0.97 (0.86 - 1.10)        | 1545/1593       |
| rs2719232        | 57048738                  | 0.07238         | 0.92 (0.85 - 1.01)        | 2156/1999       | 0.193                     | 0.93 (0.84 - 1.03)        | 1545/1593       |
| rs10101914       | 57049241                  | 0.5314          | 1.03 (0.93 - 1.15)        | 2156/1999       | 0.6622                    | 0.99 (0.88 - 1.12)        | 1545/1593       |
| rs16922502       | 57049990                  | 0.3667          | 1.05 (0.95 - 1.16)        | 2246/2226       | 0.5966                    | 1.03 (0.92 - 1.15)        | 1855/1850       |
| rs2466007        | 57051741                  | 0.1523          | 0.94 (0.86 - 1.02)        | 2174/2025       | 0.1613                    | 0.93 (0.85 - 1.03)        | 1783/1649       |
| rs16922508       | 57054784                  | 0.04299         | 0.90 (0.82 - 1.00)        | 2156/1999       | 0.6256                    | 0.95 (0.85 - 1.07)        | 1545/1593       |
| rs7828483        | 57055442                  | 0.03213         | 0.89 (0.81 - 0.99)        | 2156/1999       | 0.6569                    | 0.96 (0.85 - 1.08)        | 1545/1593       |
| rs2667979        | 57060355                  | 0.006162        | 0.78 (0.65 - 0.93)        | 532/868         |                           |                           |                 |
| rs2667978        | 57060505                  | 0.01596         | 0.88 (0.79 - 0.98)        | 2174/2025       | 0.08687                   | 0.90 (0.80 - 1.02)        | 1783/1649       |
| rs16920176       | 57061690                  | 0.9263          | 0.99 (0.80 - 1.23)        | 2156/1999       | 0.8534                    | 1.02 (0.79 - 1.32)        | 1545/1593       |
| rs16920186       | 57063272                  | 0.9263          | 0.99 (0.80 - 1.23)        | 2156/1999       | 0.8534                    | 1.02 (0.79 - 1.32)        | 1545/1593       |
| rs4061077        | 57065996                  | 0.01504         | 0.89 (0.81 - 0.98)        | 2246/2226       | 0.1212                    | 0.92 (0.83 - 1.02)        | 1855/1850       |
| rs9650314        | 57066164                  | 0.02607         | 0.89 (0.80 - 0.99)        | 2156/1999       | 0.5888                    | 0.93 (0.83 - 1.05)        | 1545/1593       |
| rs16920192       | 57066580                  | 0.03147         | 0.90 (0.81 - 0.99)        | 2156/1999       | 0.5772                    | 0.95 (0.84 - 1.06)        | 1545/1593       |
| rs1912818        | 57066875                  | 0.02036         | 0.89 (0.81 - 0.98)        | 2254/2228       | 0.1497                    | 0.93 (0.83 - 1.03)        | 1863/1852       |
| rs2719252        | 57067406                  | 0.02872         | 0.89 (0.81 - 0.99)        | 2156/1999       | 0.5928                    | 0.94 (0.84 - 1.06)        | 1545/1593       |
| rs2719253        | 57067720                  | 0.03252         | 0.90 (0.81 - 0.99)        | 2156/1999       | 0.6024                    | 0.95 (0.85 - 1.06)        | 1545/1593       |
| rs2667974        | 57067931                  | 0.01392         | 0.88 (0.80 - 0.97)        | 2156/1999       | 0.538                     | 0.95 (0.84 - 1.06)        | 1545/1593       |
| rs10282821       | 57068622                  | 0.5138          | 1.04 (0.93 - 1.15)        | 2156/1999       | 0.7111                    | 1.02 (0.91 - 1.15)        | 1545/1593       |
| rs2667972        | 57069215                  | 0.02367         | 0.88 (0.79 - 0.98)        | 2156/1999       | 0.6207                    | 0.93 (0.83 - 1.06)        | 1545/1593       |
| rs2719243        | 57069530                  | 0.03252         | 0.90 (0.81 - 0.99)        | 2156/1999       | 0.6024                    | 0.95 (0.85 - 1.06)        | 1545/1593       |
| rs2719242        | 57069786                  | 0.02633         | 0.89 (0.81 - 0.99)        | 2156/1999       | 0.5819                    | 0.94 (0.84 - 1.06)        | 1545/1593       |
| rs4738466        | 57073255                  | 0.1214          | 0.90 (0.79 - 1.03)        | 2156/1999       | 0.01115                   | 0.85 (0.74 - 0.99)        | 1545/1593       |
| rs3106348        | 57079720                  | 0.05191         | 0.91 (0.82 - 1.00)        | 2156/1999       | 0.7297                    | 0.95 (0.84 - 1.06)        | 1545/1593       |
| rs7824121        | 57084226                  | 0.1737          | 0.91 (0.80 - 1.04)        | 2156/1999       | 0.01723                   | 0.87 (0.75 - 1.01)        | 1545/1593       |
