# Supplementary material
Source: PubMed Central journal article supplement (PMC2750001)
Supplement: NIHMS124089-supplement-table_3.pdf [file NIHMS124089-supplement-table_3.pdf]

Supplemental Table 3 (a). Case-control association analysis when cases stratified based upon ACR criteria

| SNP        | BP       | No Enhancement (1545/1593)* |                  | ANA (1435/1593)  |                  | Arthritis (1236/1593) |                  |
|------------|----------|-----------------------------|------------------|------------------|------------------|-----------------------|------------------|
|            |          | P                           | OR (95% C.I.)    | P                | OR (95% C.I.)    | P                     | OR (95% C.I.)    |
| rs3808391  | 56953203 | 0.0545                      | 1.1 (1-1.22)     | 0.09823          | 1.09 (0.98-1.21) | 0.08086               | 1.1 (0.99-1.22)  |
| rs182832   | 56953415 | 0.4885                      | 1.05 (0.92-1.18) | 0.4912           | 1.05 (0.92-1.19) | 0.4826                | 1.05 (0.92-1.19) |
| rs6983130  | 56955793 | <b>0.0006718</b>            | 0.79 (0.69-0.91) | <b>0.0009988</b> | 0.79 (0.69-0.91) | <b>0.003281</b>       | 0.81 (0.7-0.93)  |
| rs6474026  | 56956047 | <b>0.013</b>                | 0.85 (0.75-0.97) | <b>0.02273</b>   | 0.86 (0.76-0.98) | <b>0.03196</b>        | 0.86 (0.76-0.99) |
| rs7834615  | 56959994 | 0.1156                      | 1.08 (0.98-1.2)  | 0.2169           | 1.07 (0.96-1.18) | 0.178                 | 1.08 (0.97-1.2)  |
| rs16922309 | 56963245 | 0.3053                      | 0.89 (0.7-1.12)  | 0.4537           | 0.91 (0.72-1.16) | 0.1617                | 0.84 (0.65-1.08) |
| rs333619   | 56964623 | 0.1413                      | 1.08 (0.98-1.19) | 0.2421           | 1.06 (0.96-1.18) | 0.09874               | 1.09 (0.98-1.22) |
| rs7820484  | 56968031 | 0.901                       | 1.02 (0.75-1.39) | 0.7191           | 1.06 (0.77-1.45) | 0.5404                | 1.11 (0.81-1.52) |
| rs7005312  | 56968993 | 0.7502                      | 0.98 (0.89-1.09) | 0.9055           | 1.01 (0.91-1.12) | 0.4426                | 0.96 (0.86-1.07) |
| rs1466138  | 56970495 | 0.2394                      | 0.9 (0.75-1.08)  | 0.1548           | 0.87 (0.72-1.05) | 0.2689                | 0.9 (0.74-1.09)  |
| rs7840325  | 56971216 | 0.3255                      | 1.05 (0.95-1.16) | 0.4342           | 1.04 (0.94-1.15) | 0.1377                | 1.08 (0.97-1.2)  |
| rs9643489  | 56972210 | 0.3632                      | 0.92 (0.77-1.1)  | 0.3652           | 0.92 (0.77-1.1)  | 0.4343                | 0.93 (0.77-1.12) |
| rs7831367  | 56973233 | 0.3795                      | 0.93 (0.78-1.1)  | 0.3915           | 0.93 (0.78-1.11) | 0.5621                | 0.95 (0.79-1.14) |
| rs1980042  | 56975196 | 0.3248                      | 0.95 (0.86-1.05) | 0.3925           | 0.96 (0.86-1.06) | 0.09963               | 0.91 (0.82-1.02) |
| rs1027990  | 56976863 | 0.2639                      | 0.94 (0.85-1.04) | 0.3178           | 0.95 (0.86-1.05) | 0.07419               | 0.91 (0.82-1.01) |
| rs1027989  | 56976975 | 0.3265                      | 0.92 (0.77-1.09) | 0.3277           | 0.91 (0.77-1.09) | 0.4275                | 0.93 (0.77-1.12) |
| rs6474030  | 56980702 | 0.5233                      | 0.95 (0.81-1.11) | 0.6038           | 0.96 (0.82-1.12) | 0.5739                | 0.95 (0.81-1.13) |
| rs4551325  | 56985745 | <b>0.01032</b>              | 0.87 (0.78-0.97) | <b>0.01713</b>   | 0.88 (0.79-0.98) | <b>0.008486</b>       | 0.86 (0.77-0.96) |
| rs1397976  | 56987939 | <b>0.01184</b>              | 0.87 (0.79-0.97) | <b>0.01527</b>   | 0.88 (0.79-0.97) | <b>0.004764</b>       | 0.85 (0.76-0.95) |
| rs6474033  | 56988570 | 0.8182                      | 0.98 (0.84-1.15) | 0.9304           | 0.99 (0.85-1.16) | 0.7799                | 0.98 (0.83-1.15) |
| rs10095917 | 56992814 | <b>0.02599</b>              | 0.87 (0.78-0.98) | <b>0.02377</b>   | 0.87 (0.77-0.98) | <b>0.007295</b>       | 0.84 (0.74-0.95) |
| rs6985030  | 57007430 | 0.05938                     | 0.88 (0.77-1.01) | 0.07403          | 0.88 (0.77-1.01) | <b>0.0475</b>         | 0.86 (0.75-1)    |
| rs16922425 | 57008823 | 0.494                       | 1.04 (0.94-1.14) | 0.4542           | 1.04 (0.94-1.15) | 0.4479                | 1.04 (0.94-1.16) |
| rs7829816  | 57011940 | <b>0.02829</b>              | 0.87 (0.77-0.99) | <b>0.03559</b>   | 0.87 (0.77-0.99) | <b>0.01071</b>        | 0.84 (0.74-0.96) |
| rs2100245  | 57012654 | <b>0.02507</b>              | 0.87 (0.77-0.98) | <b>0.02308</b>   | 0.87 (0.77-0.98) | <b>0.005228</b>       | 0.83 (0.73-0.95) |
| rs16922459 | 57016726 | <b>0.02683</b>              | 0.86 (0.75-0.98) | <b>0.03382</b>   | 0.86 (0.75-0.99) | <b>0.02004</b>        | 0.84 (0.73-0.97) |
| rs12334430 | 57022514 | <b>0.03787</b>              | 0.88 (0.77-0.99) | <b>0.04512</b>   | 0.88 (0.77-1)    | <b>0.01851</b>        | 0.85 (0.75-0.97) |
| rs16922463 | 57024223 | <b>0.0361</b>               | 0.87 (0.77-0.99) | <b>0.04227</b>   | 0.88 (0.77-1)    | <b>0.0182</b>         | 0.85 (0.74-0.97) |
| rs7813271  | 57025705 | <b>0.04089</b>              | 0.88 (0.77-0.99) | <b>0.04778</b>   | 0.88 (0.77-1)    | <b>0.01771</b>        | 0.85 (0.74-0.97) |
| rs2292419  | 57029334 | 0.1713                      | 1.08 (0.97-1.2)  | 0.1688           | 1.08 (0.97-1.21) | 0.09492               | 1.1 (0.98-1.24)  |
| rs10089932 | 57029511 | 0.4236                      | 1.05 (0.94-1.17) | 0.3744           | 1.05 (0.94-1.17) | 0.2537                | 1.07 (0.95-1.2)  |
| rs7828258  | 57030499 | 0.3626                      | 1.05 (0.95-1.16) | 0.3553           | 1.05 (0.95-1.16) | 0.2639                | 1.06 (0.96-1.18) |
| rs2668017  | 57032420 | 0.9655                      | 1 (0.9-1.12)     | 0.961            | 1 (0.89-1.13)    | 0.5739                | 1.04 (0.92-1.17) |
| rs2719240  | 57032602 | 0.9127                      | 1.01 (0.9-1.12)  | 0.9441           | 1 (0.9-1.12)     | 0.7304                | 1.02 (0.91-1.15) |
| rs2719268  | 57034636 | 0.9311                      | 1.01 (0.9-1.13)  | 0.9246           | 1.01 (0.9-1.13)  | 0.5739                | 1.04 (0.92-1.17) |
| rs2668021  | 57036101 | 0.2642                      | 0.94 (0.84-1.05) | 0.2305           | 0.93 (0.83-1.05) | 0.1287                | 0.91 (0.81-1.03) |
| rs12114560 | 57037042 | 0.9759                      | 1 (0.77-1.3)     | 0.8686           | 0.98 (0.75-1.28) | 0.7129                | 0.95 (0.72-1.26) |
| rs2719266  | 57037257 | 0.2152                      | 0.94 (0.85-1.04) | 0.2094           | 0.94 (0.85-1.04) | 0.2489                | 0.94 (0.85-1.05) |
| rs2719265  | 57037831 | 0.2358                      | 0.94 (0.85-1.04) | 0.2295           | 0.94 (0.85-1.04) | 0.2544                | 0.94 (0.85-1.05) |
| rs907425   | 57038845 | 0.1699                      | 0.93 (0.84-1.03) | 0.1518           | 0.93 (0.84-1.03) | 0.1503                | 0.93 (0.83-1.03) |
| rs1877301  | 57039144 | 0.1799                      | 0.93 (0.85-1.03) | 0.1815           | 0.93 (0.84-1.03) | 0.2097                | 0.93 (0.84-1.04) |
| rs868541   | 57039314 | 0.1722                      | 0.93 (0.84-1.03) | 0.1746           | 0.93 (0.84-1.03) | 0.2038                | 0.93 (0.84-1.04) |
| rs13257714 | 57040111 | 0.7602                      | 0.98 (0.87-1.11) | 0.7233           | 0.98 (0.86-1.11) | 0.9033                | 0.99 (0.87-1.13) |
| rs2667985  | 57042912 | 0.07319                     | 0.87 (0.75-1.01) | 0.07427          | 0.87 (0.75-1.01) | 0.08717               | 0.87 (0.74-1.02) |
| rs1027987  | 57044737 | 0.1981                      | 0.94 (0.85-1.04) | 0.2008           | 0.94 (0.85-1.04) | 0.2206                | 0.94 (0.84-1.04) |
| rs1027986  | 57045025 | 0.1982                      | 0.94 (0.85-1.04) | 0.201            | 0.94 (0.85-1.04) | 0.221                 | 0.94 (0.84-1.04) |
| rs907423   | 57046172 | 0.197                       | 0.94 (0.85-1.04) | 0.1928           | 0.93 (0.84-1.04) | 0.2409                | 0.94 (0.84-1.04) |
| rs952784   | 57046643 | 0.6982                      | 0.98 (0.86-1.1)  | 0.6614           | 0.97 (0.86-1.1)  | 0.8346                | 0.99 (0.87-1.12) |
| rs7838485  | 57048155 | 0.6382                      | 0.97 (0.86-1.1)  | 0.5988           | 0.97 (0.85-1.1)  | 0.7863                | 0.98 (0.86-1.12) |
| rs2719232  | 57048738 | 0.164                       | 0.93 (0.84-1.03) | 0.1652           | 0.93 (0.84-1.03) | 0.2013                | 0.93 (0.84-1.04) |
| rs10101914 | 57049241 | 0.8825                      | 0.99 (0.88-1.12) | 0.8267           | 0.99 (0.87-1.12) | 0.959                 | 1 (0.88-1.14)    |
| rs16922502 | 57049990 | 0.6697                      | 0.97 (0.86-1.1)  | 0.6296           | 0.97 (0.86-1.1)  | 0.8085                | 0.98 (0.86-1.12) |
| rs2466007  | 57051741 | 0.1308                      | 0.93 (0.84-1.02) | 0.1359           | 0.93 (0.84-1.03) | 0.1359                | 0.92 (0.83-1.03) |
| rs16922508 | 57054784 | 0.4229                      | 0.95 (0.85-1.07) | 0.471            | 0.96 (0.85-1.08) | 0.3326                | 0.94 (0.83-1.06) |
| rs7828483  | 57055442 | 0.5136                      | 0.96 (0.85-1.08) | 0.736            | 0.98 (0.87-1.11) | 0.3742                | 0.94 (0.83-1.07) |
| rs2719246  | 57056975 | 0.06758                     | 0.88 (0.76-1.01) | 0.08105          | 0.88 (0.76-1.02) | 0.1829                | 0.9 (0.78-1.05)  |
| rs2667978  | 57060505 | 0.2389                      | 0.93 (0.82-1.05) | 0.2863           | 0.93 (0.83-1.06) | 0.2004                | 0.92 (0.81-1.05) |
| rs16920176 | 57061690 | 0.8558                      | 1.02 (0.79-1.32) | 0.9226           | 1.01 (0.78-1.31) | 0.9387                | 0.99 (0.75-1.3)  |
| rs16920186 | 57063272 | 0.8558                      | 1.02 (0.79-1.32) | 0.9226           | 1.01 (0.78-1.31) | 0.9387                | 0.99 (0.75-1.3)  |
| rs4061077  | 57065996 | 0.3614                      | 0.95 (0.85-1.06) | 0.3947           | 0.95 (0.85-1.07) | 0.2539                | 0.93 (0.82-1.05) |
| rs9650314  | 57066164 | 0.2602                      | 0.93 (0.83-1.05) | 0.3075           | 0.94 (0.83-1.06) | 0.2118                | 0.92 (0.81-1.05) |
| rs16920192 | 57066580 | 0.3459                      | 0.95 (0.84-1.06) | 0.3774           | 0.95 (0.84-1.07) | 0.2395                | 0.93 (0.82-1.05) |
| rs1912818  | 57066875 | 0.3365                      | 0.95 (0.84-1.06) | 0.3659           | 0.95 (0.84-1.07) | 0.2283                | 0.93 (0.82-1.05) |
| rs2719252  | 57067406 | 0.3244                      | 0.94 (0.84-1.06) | 0.3469           | 0.95 (0.84-1.06) | 0.2382                | 0.93 (0.82-1.05) |
| rs2719253  | 57067720 | 0.3614                      | 0.95 (0.85-1.06) | 0.3947           | 0.95 (0.85-1.07) | 0.2539                | 0.93 (0.82-1.05) |
| rs2667974  | 57067931 | 0.3591                      | 0.95 (0.84-1.06) | 0.4489           | 0.96 (0.85-1.08) | 0.3005                | 0.94 (0.83-1.06) |
| rs10282821 | 57068622 | 0.7212                      | 1.02 (0.91-1.15) | 0.8109           | 1.02 (0.9-1.15)  | 0.5833                | 1.04 (0.91-1.18) |
| rs2667972  | 57069215 | 0.2764                      | 0.93 (0.83-1.06) | 0.3266           | 0.94 (0.83-1.06) | 0.2285                | 0.92 (0.81-1.05) |
| rs2719243  | 57069530 | 0.3614                      | 0.95 (0.85-1.06) | 0.3947           | 0.95 (0.85-1.07) | 0.2539                | 0.93 (0.82-1.05) |
| rs2719242  | 57069786 | 0.32                        | 0.94 (0.84-1.06) | 0.339            | 0.94 (0.84-1.06) | 0.2316                | 0.93 (0.82-1.05) |
| rs4738466  | 57073255 | <b>0.03687</b>              | 0.85 (0.74-0.99) | <b>0.03526</b>   | 0.85 (0.73-0.99) | <b>0.0297</b>         | 0.84 (0.72-0.98) |
| rs3106348  | 57079720 | 0.3475                      | 0.95 (0.84-1.06) | 0.3783           | 0.95 (0.84-1.07) | 0.2372                | 0.93 (0.82-1.05) |
| rs7824121  | 57084226 | 0.06319                     | 0.87 (0.75-1.01) | 0.05938          | 0.86 (0.74-1.01) | 0.05841               | 0.86 (0.73-1.01) |

Abbreviations: SNP, Single Nuclear Polymorphism; BP, Base Position; MAF Case, Minor Allele Frequency in cases; MAF Control, Minor Allele Frequency in Controls; P, p-value; OR, Odds Ratio; C.I., Confidence Interval

\* (# cases/# controls)

Supplemental Table 3 (b). Case-control association analysis when cases stratified based upon ACR criteria

| SNP        | BP       | No Enhancement (1545/1593)* |                  | Discoid Rash (147/1593) |                         | Hematological Disorders (666/1593) |                         |
|------------|----------|-----------------------------|------------------|-------------------------|-------------------------|------------------------------------|-------------------------|
|            |          | P                           | OR (95% C.I.)    | P                       | OR (95% C.I.)           | P                                  | OR (95% C.I.)           |
| rs3808391  | 56953203 | 0.0545                      | 1.1 (1-1.22)     | 0.08679                 | 1.23 (0.97-1.57)        | 0.06545                            | 1.13 (0.99-1.29)        |
| rs182832   | 56953415 | 0.4885                      | 1.05 (0.92-1.18) | 0.954                   | 0.99 (0.73-1.34)        | 0.464                              | 1.06 (0.91-1.24)        |
| rs6983130  | 56955793 | <b>0.0006718</b>            | 0.79 (0.69-0.91) | 0.1827                  | 0.8 (0.57-1.11)         | <b>0.001479</b>                    | <b>0.75 (0.62-0.89)</b> |
| rs6474026  | 56956047 | <b>0.013</b>                | 0.85 (0.75-0.97) | 0.1647                  | 0.8 (0.58-1.1)          | <b>0.0319</b>                      | 0.83 (0.71-0.98)        |
| rs7834615  | 56959994 | 0.1156                      | 1.08 (0.98-1.2)  | 0.2001                  | 1.17 (0.92-1.49)        | 0.1158                             | 1.11 (0.97-1.26)        |
| rs16922309 | 56963245 | 0.3053                      | 0.89 (0.7-1.12)  | 0.809                   | 0.93 (0.53-1.63)        | 0.4748                             | 0.9 (0.66-1.21)         |
| rs333619   | 56964623 | 0.1413                      | 1.08 (0.98-1.19) | 0.3377                  | 1.12 (0.88-1.43)        | 0.1344                             | 1.1 (0.97-1.25)         |
| rs7820484  | 56968031 | 0.901                       | 1.02 (0.75-1.39) | 0.6409                  | 1.18 (0.59-2.37)        | 0.8519                             | 1.04 (0.7-1.54)         |
| rs7005312  | 56968993 | 0.7502                      | 0.98 (0.89-1.09) | 0.7159                  | 1.05 (0.82-1.34)        | 0.6592                             | 0.97 (0.85-1.11)        |
| rs1466138  | 56970495 | 0.2394                      | 0.9 (0.75-1.08)  | <b>0.04696</b>          | 0.59 (0.34-1)           | 0.1491                             | 0.84 (0.66-1.07)        |
| rs7840325  | 56971216 | 0.3255                      | 1.05 (0.95-1.16) | 0.7714                  | 1.04 (0.81-1.32)        | 0.1503                             | 1.1 (0.97-1.25)         |
| rs9643489  | 56972210 | 0.3632                      | 0.92 (0.77-1.1)  | 0.1632                  | 0.72 (0.45-1.15)        | 0.2242                             | 0.87 (0.69-1.09)        |
| rs7831367  | 56973233 | 0.3795                      | 0.93 (0.78-1.1)  | 0.2774                  | 0.78 (0.5-1.22)         | 0.3014                             | 0.89 (0.71-1.11)        |
| rs1980042  | 56975196 | 0.3248                      | 0.95 (0.86-1.05) | 0.6206                  | 1.06 (0.84-1.35)        | 0.7186                             | 0.98 (0.86-1.11)        |
| rs1027990  | 56976863 | 0.2639                      | 0.94 (0.85-1.04) | 0.7703                  | 1.04 (0.81-1.32)        | 0.5812                             | 0.96 (0.85-1.1)         |
| rs1027989  | 56976975 | 0.3265                      | 0.92 (0.77-1.09) | 0.1721                  | 0.72 (0.45-1.16)        | 0.1859                             | 0.86 (0.68-1.08)        |
| rs6474030  | 56980702 | 0.5233                      | 0.95 (0.81-1.11) | 0.5722                  | 0.89 (0.61-1.32)        | 0.4213                             | 0.92 (0.75-1.13)        |
| rs4551325  | 56985745 | <b>0.01032</b>              | 0.87 (0.78-0.97) | 0.1216                  | 0.81 (0.63-1.06)        | <b>0.01762</b>                     | 0.85 (0.74-0.97)        |
| rs1397976  | 56987939 | <b>0.01184</b>              | 0.87 (0.79-0.97) | 0.1279                  | 0.82 (0.63-1.06)        | <b>0.01217</b>                     | 0.84 (0.73-0.96)        |
| rs6474033  | 56988570 | 0.8182                      | 0.98 (0.84-1.15) | 0.6913                  | 0.93 (0.63-1.36)        | 0.5662                             | 0.94 (0.77-1.16)        |
| rs10095917 | 56992814 | <b>0.02599</b>              | 0.87 (0.78-0.98) | 0.2786                  | 0.85 (0.63-1.14)        | <b>0.02228</b>                     | 0.83 (0.71-0.97)        |
| rs6985030  | 57007430 | 0.05938                     | 0.88 (0.77-1.01) | 0.3129                  | 0.84 (0.6-1.18)         | 0.1169                             | 0.87 (0.73-1.04)        |
| rs16922425 | 57008823 | 0.494                       | 1.04 (0.94-1.14) | 0.5721                  | 1.07 (0.84-1.36)        | 0.5683                             | 1.04 (0.91-1.18)        |
| rs7829816  | 57011940 | <b>0.02829</b>              | 0.87 (0.77-0.99) | 0.207                   | 0.82 (0.6-1.12)         | 0.0526                             | 0.85 (0.73-1)           |
| rs2100245  | 57012654 | <b>0.02507</b>              | 0.87 (0.77-0.98) | 0.2484                  | 0.84 (0.62-1.13)        | <b>0.02081</b>                     | 0.83 (0.71-0.97)        |
| rs16922459 | 57016726 | <b>0.02683</b>              | 0.86 (0.75-0.98) | 0.3336                  | 0.85 (0.61-1.18)        | 0.06126                            | 0.84 (0.71-1.01)        |
| rs12334430 | 57022514 | <b>0.03787</b>              | 0.88 (0.77-0.99) | 0.5063                  | 0.9 (0.67-1.22)         | 0.0698                             | 0.86 (0.73-1.01)        |
| rs16922463 | 57024223 | <b>0.0361</b>               | 0.87 (0.77-0.99) | 0.5305                  | 0.91 (0.67-1.23)        | 0.07161                            | 0.86 (0.73-1.01)        |
| rs7813271  | 57025705 | <b>0.04089</b>              | 0.88 (0.77-0.99) | 0.5386                  | 0.91 (0.67-1.23)        | 0.06626                            | 0.86 (0.73-1.01)        |
| rs2292419  | 57029334 | 0.1713                      | 1.08 (0.97-1.2)  | 0.63                    | 1.07 (0.82-1.38)        | 0.1366                             | 1.11 (0.97-1.28)        |
| rs10089932 | 57029511 | 0.4236                      | 1.05 (0.94-1.17) | 0.917                   | 1.01 (0.78-1.32)        | 0.1966                             | 1.1 (0.95-1.26)         |
| rs7828258  | 57030499 | 0.3626                      | 1.05 (0.95-1.16) | 0.7783                  | 1.04 (0.81-1.31)        | 0.6631                             | 1.03 (0.91-1.17)        |
| rs2668017  | 57032420 | 0.9655                      | 1 (0.9-1.12)     | 0.9681                  | 0.99 (0.76-1.31)        | 0.2998                             | 1.08 (0.93-1.25)        |
| rs2719240  | 57032602 | 0.9127                      | 1.01 (0.9-1.12)  | 0.8207                  | 1.03 (0.79-1.34)        | 0.4061                             | 1.06 (0.92-1.22)        |
| rs2719268  | 57034636 | 0.9311                      | 1.01 (0.9-1.13)  | 0.9681                  | 0.99 (0.76-1.31)        | 0.278                              | 1.08 (0.94-1.25)        |
| rs2668021  | 57036101 | 0.2642                      | 0.94 (0.84-1.05) | 0.9307                  | 0.99 (0.75-1.3)         | 0.1975                             | 0.91 (0.78-1.05)        |
| rs12114560 | 57037042 | 0.9759                      | 1 (0.77-1.3)     | 0.3634                  | 1.3 (0.74-2.29)         | 0.3613                             | 0.85 (0.59-1.21)        |
| rs2719266  | 57037257 | 0.2152                      | 0.94 (0.85-1.04) | 0.8395                  | 0.98 (0.77-1.24)        | 0.444                              | 0.95 (0.84-1.08)        |
| rs2719265  | 57037831 | 0.2358                      | 0.94 (0.85-1.04) | 0.8406                  | 0.98 (0.77-1.24)        | 0.4348                             | 0.95 (0.84-1.08)        |
| rs907425   | 57038845 | 0.1699                      | 0.93 (0.84-1.03) | 0.7542                  | 0.96 (0.76-1.22)        | 0.3949                             | 0.95 (0.83-1.08)        |
| rs1877301  | 57039144 | 0.1799                      | 0.93 (0.85-1.03) | 0.8305                  | 0.97 (0.77-1.24)        | 0.3717                             | 0.94 (0.83-1.07)        |
| rs868541   | 57039314 | 0.1722                      | 0.93 (0.84-1.03) | 0.8144                  | 0.97 (0.76-1.24)        | 0.3758                             | 0.94 (0.83-1.07)        |
| rs13257714 | 57040111 | 0.7602                      | 0.98 (0.87-1.11) | 0.8425                  | 1.03 (0.77-1.38)        | 0.6121                             | 1.04 (0.89-1.22)        |
| rs2667985  | 57042912 | 0.07319                     | 0.87 (0.75-1.01) | <b>0.002236</b>         | <b>0.5 (0.32-0.79)</b>  | 0.1133                             | 0.85 (0.7-1.04)         |
| rs1027987  | 57044737 | 0.1981                      | 0.94 (0.85-1.04) | 0.8312                  | 0.97 (0.77-1.24)        | 0.3979                             | 0.95 (0.83-1.08)        |
| rs1027986  | 57045025 | 0.1982                      | 0.94 (0.85-1.04) | 0.8305                  | 0.97 (0.77-1.24)        | 0.3995                             | 0.95 (0.83-1.08)        |
| rs907423   | 57046172 | 0.197                       | 0.94 (0.85-1.04) | 0.9114                  | 0.99 (0.77-1.26)        | 0.3647                             | 0.94 (0.83-1.07)        |
| rs952784   | 57046643 | 0.6982                      | 0.98 (0.86-1.1)  | 0.8566                  | 1.03 (0.77-1.38)        | 0.6302                             | 1.04 (0.89-1.21)        |
| rs7838485  | 57048155 | 0.6382                      | 0.97 (0.86-1.1)  | 0.8524                  | 1.03 (0.77-1.38)        | 0.7047                             | 1.03 (0.88-1.21)        |
| rs2719232  | 57048738 | 0.164                       | 0.93 (0.84-1.03) | 0.8224                  | 0.97 (0.77-1.24)        | 0.3376                             | 0.94 (0.83-1.07)        |
| rs10101914 | 57049241 | 0.8825                      | 0.99 (0.88-1.12) | 0.7329                  | 1.05 (0.79-1.41)        | 0.4959                             | 1.06 (0.9-1.23)         |
| rs16922502 | 57049990 | 0.6697                      | 0.97 (0.86-1.1)  | 0.8425                  | 1.03 (0.77-1.38)        | 0.6871                             | 1.03 (0.88-1.21)        |
| rs2466007  | 57051741 | 0.1308                      | 0.93 (0.84-1.02) | 0.7009                  | 0.95 (0.75-1.21)        | 0.4962                             | 0.96 (0.84-1.09)        |
| rs16922508 | 57054784 | 0.4229                      | 0.95 (0.85-1.07) | 0.6225                  | 0.93 (0.71-1.23)        | 0.3643                             | 0.93 (0.8-1.08)         |
| rs7828483  | 57055442 | 0.5136                      | 0.96 (0.85-1.08) | 0.9777                  | 1 (0.75-1.34)           | 0.7794                             | 0.98 (0.84-1.14)        |
| rs2719246  | 57056975 | 0.06758                     | 0.88 (0.76-1.01) | 0.7037                  | 0.94 (0.67-1.31)        | 0.0811                             | 0.85 (0.7-1.02)         |
| rs2667978  | 57060505 | 0.2389                      | 0.93 (0.82-1.05) | 0.4779                  | 0.9 (0.67-1.21)         | 0.3861                             | 0.93 (0.8-1.09)         |
| rs16920176 | 57061690 | 0.8558                      | 1.02 (0.79-1.32) | 0.6752                  | 1.13 (0.63-2.03)        | 0.5271                             | 0.9 (0.64-1.26)         |
| rs16920186 | 57063272 | 0.8558                      | 1.02 (0.79-1.32) | 0.6752                  | 1.13 (0.63-2.03)        | 0.5271                             | 0.9 (0.64-1.26)         |
| rs4061077  | 57065996 | 0.3614                      | 0.95 (0.85-1.06) | 0.6728                  | 0.94 (0.71-1.24)        | 0.2977                             | 0.92 (0.8-1.07)         |
| rs9650314  | 57066164 | 0.2602                      | 0.93 (0.83-1.05) | 0.5088                  | 0.9 (0.67-1.22)         | 0.4063                             | 0.94 (0.8-1.1)          |
| rs16920192 | 57066580 | 0.3459                      | 0.95 (0.84-1.06) | 0.6728                  | 0.94 (0.71-1.24)        | 0.2977                             | 0.92 (0.8-1.07)         |
| rs1912818  | 57066875 | 0.3365                      | 0.95 (0.84-1.06) | 0.6339                  | 0.93 (0.71-1.24)        | 0.2951                             | 0.92 (0.8-1.07)         |
| rs2719252  | 57067406 | 0.3244                      | 0.94 (0.84-1.06) | 0.539                   | 0.92 (0.69-1.22)        | 0.3078                             | 0.92 (0.8-1.08)         |
| rs2719253  | 57067720 | 0.3614                      | 0.95 (0.85-1.06) | 0.6728                  | 0.94 (0.71-1.24)        | 0.2977                             | 0.92 (0.8-1.07)         |
| rs2667974  | 57067931 | 0.3591                      | 0.95 (0.84-1.06) | 0.7866                  | 0.96 (0.73-1.27)        | 0.4083                             | 0.94 (0.81-1.09)        |
| rs10282821 | 57068622 | 0.7212                      | 1.02 (0.91-1.15) | 0.2521                  | 1.18 (0.89-1.56)        | 0.4488                             | 1.06 (0.91-1.24)        |
| rs2667972  | 57069215 | 0.2764                      | 0.93 (0.83-1.06) | 0.5088                  | 0.9 (0.67-1.22)         | 0.4063                             | 0.94 (0.8-1.1)          |
| rs2719243  | 57069530 | 0.3614                      | 0.95 (0.85-1.06) | 0.6728                  | 0.94 (0.71-1.24)        | 0.2977                             | 0.92 (0.8-1.07)         |
| rs2719242  | 57069786 | 0.32                        | 0.94 (0.84-1.06) | 0.6225                  | 0.93 (0.71-1.23)        | 0.263                              | 0.92 (0.79-1.07)        |
| rs4738466  | 57073255 | <b>0.03687</b>              | 0.85 (0.74-0.99) | <b>0.006179</b>         | <b>0.55 (0.36-0.85)</b> | 0.1393                             | 0.86 (0.71-1.05)        |
| rs3106348  | 57079720 | 0.3475                      | 0.95 (0.84-1.06) | 0.8558                  | 1.03 (0.78-1.35)        | 0.3432                             | 0.93 (0.8-1.08)         |
| rs7824121  | 57084226 | 0.06319                     | 0.87 (0.75-1.01) | <b>0.00838</b>          | <b>0.57 (0.37-0.87)</b> | 0.1782                             | 0.88 (0.72-1.06)        |

Abbreviations: SNP, Single Nuclear Polymorphism; BP, Base Position; MAF Case, Minor Allele Frequency in cases; MAF Control, Minor Allele Frequency in Controls; P, p-value; OR, Odds Ratio; C.I., Confidence Interval

\* (# cases/# controls)

**Supplemental Table 3 (c).** Case-control association analysis when cases stratified based upon ACR criteria

| SNP        | BP       | No Enhancement (1545/1593)* |                  | Immunological Disorders (1032/1593) |                  | Malar Rash (869/1593) |                  |
|------------|----------|-----------------------------|------------------|-------------------------------------|------------------|-----------------------|------------------|
|            |          | P                           | OR (95% C.I.)    | P                                   | OR (95% C.I.)    | P                     | OR (95% C.I.)    |
| rs3808391  | 56953203 | 0.0545                      | 1.1 (1-1.22)     | 0.1572                              | 1.09 (0.97-1.21) | 0.1034                | 1.1 (0.98-1.24)  |
| rs182832   | 56953415 | 0.4885                      | 1.05 (0.92-1.18) | 0.5174                              | 1.05 (0.91-1.2)  | 0.9427                | 1.01 (0.87-1.16) |
| rs6983130  | 56955793 | <b>0.0006718</b>            | 0.79 (0.69-0.91) | <b>0.004071</b>                     | 0.8 (0.69-0.93)  | <b>0.0231</b>         | 0.83 (0.71-0.98) |
| rs6474026  | 56956047 | <b>0.013</b>                | 0.85 (0.75-0.97) | <b>0.04992</b>                      | 0.87 (0.75-1)    | 0.1488                | 0.9 (0.77-1.04)  |
| rs7834615  | 56959994 | 0.1156                      | 1.08 (0.98-1.2)  | 0.2563                              | 1.07 (0.95-1.2)  | 0.1748                | 1.09 (0.96-1.22) |
| rs16922309 | 56963245 | 0.3053                      | 0.89 (0.7-1.12)  | 0.6388                              | 0.94 (0.73-1.22) | 0.228                 | 0.84 (0.64-1.11) |
| rs333619   | 56964623 | 0.1413                      | 1.08 (0.98-1.19) | 0.4904                              | 1.04 (0.93-1.16) | 0.155                 | 1.09 (0.97-1.23) |
| rs7820484  | 56968031 | 0.901                       | 1.02 (0.75-1.39) | 0.7633                              | 0.95 (0.67-1.35) | 0.3062                | 1.2 (0.85-1.7)   |
| rs7005312  | 56968993 | 0.7502                      | 0.98 (0.89-1.09) | 0.6898                              | 1.02 (0.91-1.15) | 0.6873                | 0.98 (0.87-1.1)  |
| rs1466138  | 56970495 | 0.2394                      | 0.9 (0.75-1.08)  | 0.2408                              | 0.88 (0.72-1.09) | 0.1509                | 0.85 (0.68-1.06) |
| rs7840325  | 56971216 | 0.3255                      | 1.05 (0.95-1.16) | 0.6948                              | 1.02 (0.91-1.14) | 0.2997                | 1.06 (0.95-1.2)  |
| rs9643489  | 56972210 | 0.3632                      | 0.92 (0.77-1.1)  | 0.6218                              | 0.95 (0.78-1.16) | 0.2831                | 0.89 (0.72-1.1)  |
| rs7831367  | 56973233 | 0.3795                      | 0.93 (0.78-1.1)  | 0.5743                              | 0.95 (0.78-1.15) | 0.4532                | 0.92 (0.75-1.14) |
| rs1980042  | 56975196 | 0.3248                      | 0.95 (0.86-1.05) | 0.5331                              | 0.97 (0.86-1.08) | 0.5175                | 0.96 (0.85-1.08) |
| rs1027990  | 56976863 | 0.2639                      | 0.94 (0.85-1.04) | 0.4752                              | 0.96 (0.86-1.07) | 0.378                 | 0.95 (0.84-1.07) |
| rs1027989  | 56976975 | 0.3265                      | 0.92 (0.77-1.09) | 0.5684                              | 0.94 (0.78-1.15) | 0.2598                | 0.89 (0.72-1.09) |
| rs6474030  | 56980702 | 0.5233                      | 0.95 (0.81-1.11) | 0.7742                              | 0.97 (0.82-1.16) | 0.452                 | 0.93 (0.77-1.12) |
| rs4551325  | 56985745 | <b>0.01032</b>              | 0.87 (0.78-0.97) | <b>0.04291</b>                      | 0.88 (0.79-1)    | 0.08141               | 0.89 (0.79-1.01) |
| rs1397976  | 56987939 | <b>0.01184</b>              | 0.87 (0.79-0.97) | <b>0.04653</b>                      | 0.89 (0.79-1)    | 0.06833               | 0.89 (0.79-1.01) |
| rs6474033  | 56988570 | 0.8182                      | 0.98 (0.84-1.15) | 0.9253                              | 1.01 (0.85-1.2)  | 0.6562                | 0.96 (0.8-1.15)  |
| rs10095917 | 56992814 | <b>0.02599</b>              | 0.87 (0.78-0.98) | <b>0.04512</b>                      | 0.87 (0.76-1)    | 0.1813                | 0.91 (0.79-1.05) |
| rs6985030  | 57007430 | 0.05938                     | 0.88 (0.77-1.01) | 0.1232                              | 0.89 (0.76-1.03) | 0.2154                | 0.9 (0.77-1.06)  |
| rs16922425 | 57008823 | 0.494                       | 1.04 (0.94-1.14) | 0.3817                              | 1.05 (0.94-1.17) | 0.9693                | 1 (0.89-1.12)    |
| rs7829816  | 57011940 | <b>0.02829</b>              | 0.87 (0.77-0.99) | <b>0.03753</b>                      | 0.86 (0.75-0.99) | 0.1478                | 0.9 (0.78-1.04)  |
| rs2100245  | 57012654 | <b>0.02507</b>              | 0.87 (0.77-0.98) | <b>0.02261</b>                      | 0.85 (0.75-0.98) | 0.1042                | 0.89 (0.77-1.03) |
| rs16922459 | 57016726 | <b>0.02683</b>              | 0.86 (0.75-0.98) | 0.07394                             | 0.87 (0.75-1.01) | 0.1203                | 0.88 (0.75-1.03) |
| rs12334430 | 57022514 | <b>0.03787</b>              | 0.88 (0.77-0.99) | 0.05547                             | 0.87 (0.76-1)    | 0.1669                | 0.9 (0.78-1.04)  |
| rs16922463 | 57024223 | <b>0.0361</b>               | 0.87 (0.77-0.99) | 0.05471                             | 0.87 (0.76-1)    | 0.1551                | 0.9 (0.78-1.04)  |
| rs7813271  | 57025705 | <b>0.04089</b>              | 0.88 (0.77-0.99) | 0.06191                             | 0.87 (0.76-1.01) | 0.1719                | 0.9 (0.78-1.05)  |
| rs2292419  | 57029334 | 0.1713                      | 1.08 (0.97-1.2)  | 0.2055                              | 1.08 (0.96-1.22) | 0.09106               | 1.12 (0.98-1.27) |
| rs10089932 | 57029511 | 0.4236                      | 1.05 (0.94-1.17) | 0.3643                              | 1.06 (0.94-1.19) | 0.2426                | 1.08 (0.95-1.23) |
| rs7828258  | 57030499 | 0.3626                      | 1.05 (0.95-1.16) | 0.3078                              | 1.06 (0.95-1.18) | 0.9907                | 1 (0.89-1.12)    |
| rs2668017  | 57032420 | 0.9655                      | 1 (0.9-1.12)     | 0.7016                              | 1.03 (0.9-1.16)  | 0.8983                | 1.01 (0.88-1.15) |
| rs2719240  | 57032602 | 0.9127                      | 1.01 (0.9-1.12)  | 0.7645                              | 1.02 (0.9-1.15)  | 0.8553                | 1.01 (0.89-1.15) |
| rs2719268  | 57034636 | 0.9311                      | 1.01 (0.9-1.13)  | 0.6462                              | 1.03 (0.91-1.17) | 0.8998                | 1.01 (0.88-1.15) |
| rs2668021  | 57036101 | 0.2642                      | 0.94 (0.84-1.05) | 0.08712                             | 0.89 (0.79-1.02) | 0.5277                | 0.96 (0.84-1.1)  |
| rs12114560 | 57037042 | 0.9759                      | 1 (0.77-1.3)     | 0.8233                              | 0.97 (0.72-1.3)  | 0.8683                | 1.03 (0.75-1.4)  |
| rs2719266  | 57037257 | 0.2152                      | 0.94 (0.85-1.04) | 0.2938                              | 0.94 (0.84-1.05) | 0.6599                | 0.97 (0.87-1.1)  |
| rs2719265  | 57037831 | 0.2358                      | 0.94 (0.85-1.04) | 0.2625                              | 0.94 (0.84-1.05) | 0.7557                | 0.98 (0.87-1.1)  |
| rs907425   | 57038845 | 0.1699                      | 0.93 (0.84-1.03) | 0.1635                              | 0.92 (0.83-1.03) | 0.5765                | 0.97 (0.86-1.09) |
| rs1877301  | 57039144 | 0.1799                      | 0.93 (0.85-1.03) | 0.2118                              | 0.93 (0.83-1.04) | 0.6831                | 0.98 (0.87-1.1)  |
| rs868541   | 57039314 | 0.1722                      | 0.93 (0.84-1.03) | 0.2082                              | 0.93 (0.83-1.04) | 0.6806                | 0.98 (0.87-1.1)  |
| rs13257714 | 57040111 | 0.7602                      | 0.98 (0.87-1.11) | 0.991                               | 1 (0.87-1.15)    | 0.8502                | 1.01 (0.88-1.17) |
| rs2667985  | 57042912 | 0.07319                     | 0.87 (0.75-1.01) | 0.08418                             | 0.86 (0.73-1.02) | 0.1099                | 0.87 (0.72-1.03) |
| rs1027987  | 57044737 | 0.1981                      | 0.94 (0.85-1.04) | 0.239                               | 0.94 (0.84-1.05) | 0.6819                | 0.98 (0.87-1.1)  |
| rs1027986  | 57045025 | 0.1982                      | 0.94 (0.85-1.04) | 0.2396                              | 0.94 (0.84-1.05) | 0.6831                | 0.98 (0.87-1.1)  |
| rs907423   | 57046172 | 0.197                       | 0.94 (0.85-1.04) | 0.2259                              | 0.93 (0.83-1.04) | 0.6917                | 0.98 (0.87-1.1)  |
| rs952784   | 57046643 | 0.6982                      | 0.98 (0.86-1.1)  | 0.9656                              | 1 (0.87-1.14)    | 0.9107                | 1.01 (0.87-1.16) |
| rs7838485  | 57048155 | 0.6382                      | 0.97 (0.86-1.1)  | 0.9076                              | 0.99 (0.87-1.14) | 0.9774                | 1 (0.87-1.16)    |
| rs2719232  | 57048738 | 0.164                       | 0.93 (0.84-1.03) | 0.2038                              | 0.93 (0.83-1.04) | 0.6397                | 0.97 (0.86-1.09) |
| rs10101914 | 57049241 | 0.8825                      | 0.99 (0.88-1.12) | 0.9602                              | 1 (0.88-1.15)    | 0.6861                | 1.03 (0.89-1.19) |
| rs16922502 | 57049990 | 0.6697                      | 0.97 (0.86-1.1)  | 0.9292                              | 0.99 (0.87-1.14) | 0.9568                | 1 (0.87-1.16)    |
| rs2466007  | 57051741 | 0.1308                      | 0.93 (0.84-1.02) | 0.1578                              | 0.92 (0.83-1.03) | 0.5131                | 0.96 (0.85-1.08) |
| rs16922508 | 57054784 | 0.4229                      | 0.95 (0.85-1.07) | 0.3138                              | 0.94 (0.82-1.07) | 0.7767                | 0.98 (0.86-1.12) |
| rs7828483  | 57055442 | 0.5136                      | 0.96 (0.85-1.08) | 0.61                                | 0.97 (0.85-1.1)  | 0.9456                | 1.01 (0.87-1.16) |
| rs2719246  | 57056975 | 0.06758                     | 0.88 (0.76-1.01) | <b>0.01908</b>                      | 0.83 (0.7-0.97)  | 0.2763                | 0.91 (0.77-1.08) |
| rs2667978  | 57060505 | 0.2389                      | 0.93 (0.82-1.05) | 0.1422                              | 0.9 (0.79-1.04)  | 0.5819                | 0.96 (0.83-1.11) |
| rs16920176 | 57061690 | 0.8558                      | 1.02 (0.79-1.32) | 0.725                               | 1.05 (0.79-1.39) | 0.8578                | 1.03 (0.76-1.39) |
| rs16920186 | 57063272 | 0.8558                      | 1.02 (0.79-1.32) | 0.725                               | 1.05 (0.79-1.39) | 0.8578                | 1.03 (0.76-1.39) |
| rs4061077  | 57065996 | 0.3614                      | 0.95 (0.85-1.06) | 0.2408                              | 0.93 (0.81-1.05) | 0.7173                | 0.98 (0.85-1.12) |
| rs9650314  | 57066164 | 0.2602                      | 0.93 (0.83-1.05) | 0.1412                              | 0.9 (0.79-1.04)  | 0.6201                | 0.96 (0.84-1.11) |
| rs16920192 | 57066580 | 0.3459                      | 0.95 (0.84-1.06) | 0.2408                              | 0.93 (0.81-1.05) | 0.6842                | 0.97 (0.85-1.11) |
| rs1912818  | 57066875 | 0.3365                      | 0.95 (0.84-1.06) | 0.2259                              | 0.92 (0.81-1.05) | 0.6851                | 0.97 (0.85-1.11) |
| rs2719252  | 57067406 | 0.3244                      | 0.94 (0.84-1.06) | 0.2048                              | 0.92 (0.81-1.05) | 0.6582                | 0.97 (0.85-1.11) |
| rs2719253  | 57067720 | 0.3614                      | 0.95 (0.85-1.06) | 0.2408                              | 0.93 (0.81-1.05) | 0.7173                | 0.98 (0.85-1.12) |
| rs2667974  | 57067931 | 0.3591                      | 0.95 (0.84-1.06) | 0.267                               | 0.93 (0.82-1.06) | 0.8555                | 0.99 (0.86-1.13) |
| rs10282821 | 57068622 | 0.7212                      | 1.02 (0.91-1.15) | 0.8419                              | 1.01 (0.89-1.16) | 0.5374                | 1.05 (0.91-1.21) |
| rs2667972  | 57069215 | 0.2764                      | 0.93 (0.83-1.06) | 0.1482                              | 0.9 (0.79-1.04)  | 0.6201                | 0.96 (0.84-1.11) |
| rs2719243  | 57069530 | 0.3614                      | 0.95 (0.85-1.06) | 0.2408                              | 0.93 (0.81-1.05) | 0.7173                | 0.98 (0.85-1.12) |
| rs2719242  | 57069786 | 0.32                        | 0.94 (0.84-1.06) | 0.2129                              | 0.92 (0.81-1.05) | 0.6438                | 0.97 (0.85-1.11) |
| rs4738466  | 57073255 | <b>0.03687</b>              | 0.85 (0.74-0.99) | 0.0744                              | 0.86 (0.73-1.02) | <b>0.02072</b>        | 0.81 (0.68-0.97) |
| rs3106348  | 57079720 | 0.3475                      | 0.95 (0.84-1.06) | 0.2848                              | 0.93 (0.82-1.06) | 0.6178                | 0.97 (0.84-1.11) |
| rs7824121  | 57084226 | 0.06319                     | 0.87 (0.75-1.01) | 0.09972                             | 0.87 (0.74-1.03) | <b>0.03302</b>        | 0.82 (0.69-0.98) |

**Abbreviations:** SNP, Single Nuclear Polymorphism; BP, Base Position; MAF Case, Minor Allele Frequency in cases; MAF Control, Minor Allele Frequency in Controls; P, p-value; OR, Odds Ratio; C.I., Confidence Interval

\* (# cases/# controls)

**Supplemental Table 3 (d).** Case-control association analysis when cases stratified based upon ACR criteria

| SNP        | BP       | No Enhancement (1545/1593)* |                  | Renal Disorders (415/1593) |                  | Photosensitivity (973/1593) |                  |
|------------|----------|-----------------------------|------------------|----------------------------|------------------|-----------------------------|------------------|
|            |          | P                           | OR (95% C.I.)    | P                          | OR (95% C.I.)    | P                           | OR (95% C.I.)    |
| rs3808391  | 56953203 | 0.0545                      | 1.1 (1-1.22)     | 0.2646                     | 1.09 (0.94-1.28) | <u>0.01851</u>              | 1.15 (1.02-1.29) |
| rs182832   | 56953415 | 0.4885                      | 1.05 (0.92-1.18) | 0.1457                     | 1.15 (0.95-1.38) | 0.8279                      | 0.98 (0.85-1.13) |
| rs6983130  | 56955793 | <u>0.0006718</u>            | 0.79 (0.69-0.91) | 0.07557                    | 0.82 (0.67-1.02) | <u>0.002196</u>             | 0.78 (0.67-0.92) |
| rs6474026  | 56956047 | <u>0.013</u>                | 0.85 (0.75-0.97) | 0.3729                     | 0.92 (0.75-1.11) | <u>0.02056</u>              | 0.84 (0.73-0.97) |
| rs7834615  | 56959994 | 0.1156                      | 1.08 (0.98-1.2)  | 0.4518                     | 1.06 (0.91-1.24) | <u>0.04502</u>              | 1.12 (1-1.26)    |
| rs16922309 | 56963245 | 0.3053                      | 0.89 (0.7-1.12)  | 0.3025                     | 0.82 (0.57-1.19) | 0.41                        | 0.89 (0.69-1.17) |
| rs333619   | 56964623 | 0.1413                      | 1.08 (0.98-1.19) | 0.6344                     | 0.96 (0.83-1.12) | 0.1144                      | 1.1 (0.98-1.23)  |
| rs7820484  | 56968031 | 0.901                       | 1.02 (0.75-1.39) | 0.1248                     | 0.64 (0.36-1.14) | 0.8528                      | 0.97 (0.68-1.38) |
| rs7005312  | 56968993 | 0.7502                      | 0.98 (0.89-1.09) | 0.2738                     | 1.09 (0.93-1.28) | 0.5438                      | 0.96 (0.86-1.08) |
| rs1466138  | 56970495 | 0.2394                      | 0.9 (0.75-1.08)  | 0.3202                     | 0.86 (0.65-1.15) | 0.4461                      | 0.92 (0.75-1.14) |
| rs7840325  | 56971216 | 0.3255                      | 1.05 (0.95-1.16) | 0.8047                     | 1.02 (0.87-1.19) | 0.2947                      | 1.06 (0.95-1.19) |
| rs9643489  | 56972210 | 0.3632                      | 0.92 (0.77-1.1)  | 0.8493                     | 0.97 (0.75-1.27) | 0.4848                      | 0.93 (0.76-1.14) |
| rs7831367  | 56973233 | 0.3795                      | 0.93 (0.78-1.1)  | 0.5988                     | 0.93 (0.71-1.22) | 0.6701                      | 0.96 (0.79-1.17) |
| rs1980042  | 56975196 | 0.3248                      | 0.95 (0.86-1.05) | 0.9783                     | 1 (0.86-1.17)    | 0.2756                      | 0.94 (0.84-1.05) |
| rs1027990  | 56976863 | 0.2639                      | 0.94 (0.85-1.04) | 0.9497                     | 1 (0.85-1.16)    | 0.2075                      | 0.93 (0.83-1.04) |
| rs1027989  | 56976975 | 0.3265                      | 0.92 (0.77-1.09) | 0.7298                     | 0.95 (0.73-1.25) | 0.4648                      | 0.93 (0.76-1.13) |
| rs6474030  | 56980702 | 0.5233                      | 0.95 (0.81-1.11) | 0.7978                     | 0.97 (0.76-1.23) | 0.7969                      | 0.98 (0.82-1.17) |
| rs4551325  | 56985745 | <u>0.01032</u>              | 0.87 (0.78-0.97) | 0.2817                     | 0.91 (0.78-1.08) | 0.06443                     | 0.89 (0.79-1.01) |
| rs1397976  | 56987939 | <u>0.01184</u>              | 0.87 (0.79-0.97) | 0.2676                     | 0.91 (0.78-1.07) | 0.07884                     | 0.9 (0.8-1.01)   |
| rs6474033  | 56988570 | 0.8182                      | 0.98 (0.84-1.15) | 0.9172                     | 0.99 (0.78-1.26) | 0.7916                      | 1.02 (0.86-1.22) |
| rs10095917 | 56992814 | <u>0.02599</u>              | 0.87 (0.78-0.98) | 0.4925                     | 0.94 (0.78-1.13) | 0.0799                      | 0.89 (0.77-1.02) |
| rs6985030  | 57007430 | 0.05938                     | 0.88 (0.77-1.01) | 0.5508                     | 0.94 (0.76-1.16) | 0.08386                     | 0.87 (0.74-1.02) |
| rs16922425 | 57008823 | 0.494                       | 1.04 (0.94-1.14) | 0.779                      | 0.98 (0.84-1.14) | 0.9679                      | 1 (0.89-1.12)    |
| rs7829816  | 57011940 | <u>0.02829</u>              | 0.87 (0.77-0.99) | 0.8468                     | 0.98 (0.81-1.18) | <u>0.02176</u>              | 0.85 (0.74-0.98) |
| rs2100245  | 57012654 | <u>0.02507</u>              | 0.87 (0.77-0.98) | 0.7622                     | 0.97 (0.81-1.17) | <u>0.02257</u>              | 0.85 (0.74-0.98) |
| rs16922459 | 57016726 | <u>0.02683</u>              | 0.86 (0.75-0.98) | 0.3671                     | 0.91 (0.74-1.12) | <u>0.02386</u>              | 0.84 (0.72-0.98) |
| rs12334430 | 57022514 | <u>0.03787</u>              | 0.88 (0.77-0.99) | 0.477                      | 0.93 (0.77-1.13) | <u>0.02162</u>              | 0.84 (0.73-0.98) |
| rs16922463 | 57024223 | <u>0.0361</u>               | 0.87 (0.77-0.99) | 0.5142                     | 0.94 (0.77-1.14) | <u>0.02259</u>              | 0.85 (0.73-0.98) |
| rs7813271  | 57025705 | <u>0.04089</u>              | 0.88 (0.77-0.99) | 0.5577                     | 0.94 (0.78-1.14) | <u>0.02147</u>              | 0.84 (0.73-0.98) |
| rs2292419  | 57029334 | 0.1713                      | 1.08 (0.97-1.2)  | 0.3483                     | 1.08 (0.92-1.28) | 0.05668                     | 1.13 (1-1.27)    |
| rs10089932 | 57029511 | 0.4236                      | 1.05 (0.94-1.17) | 0.6454                     | 1.04 (0.88-1.23) | 0.1215                      | 1.1 (0.97-1.25)  |
| rs7828258  | 57030499 | 0.3626                      | 1.05 (0.95-1.16) | 0.9144                     | 1.01 (0.87-1.18) | 0.6446                      | 1.03 (0.92-1.15) |
| rs2668017  | 57032420 | 0.9655                      | 1 (0.9-1.12)     | 0.977                      | 1 (0.84-1.19)    | 0.5996                      | 1.04 (0.91-1.18) |
| rs2719240  | 57032602 | 0.9127                      | 1.01 (0.9-1.12)  | 0.636                      | 1.04 (0.88-1.23) | 0.6511                      | 1.03 (0.91-1.16) |
| rs2719268  | 57034636 | 0.9311                      | 1.01 (0.9-1.13)  | 0.9396                     | 1.01 (0.85-1.2)  | 0.5996                      | 1.04 (0.91-1.18) |
| rs2668021  | 57036101 | 0.2642                      | 0.94 (0.84-1.05) | 0.9726                     | 1 (0.84-1.19)    | 0.2102                      | 0.92 (0.81-1.05) |
| rs12114560 | 57037042 | 0.9759                      | 1 (0.77-1.3)     | 0.4915                     | 1.15 (0.78-1.68) | 0.9944                      | 1 (0.74-1.35)    |
| rs2719266  | 57037257 | 0.2152                      | 0.94 (0.85-1.04) | 0.8866                     | 0.99 (0.85-1.15) | 0.3159                      | 0.94 (0.84-1.06) |
| rs2719265  | 57037831 | 0.2358                      | 0.94 (0.85-1.04) | 0.9193                     | 0.99 (0.85-1.16) | 0.3811                      | 0.95 (0.85-1.07) |
| rs907425   | 57038845 | 0.1699                      | 0.93 (0.84-1.03) | 0.7694                     | 0.98 (0.84-1.14) | 0.3456                      | 0.95 (0.85-1.06) |
| rs1877301  | 57039144 | 0.1799                      | 0.93 (0.85-1.03) | 0.8059                     | 0.98 (0.84-1.14) | 0.333                       | 0.95 (0.84-1.06) |
| rs868541   | 57039314 | 0.1722                      | 0.93 (0.84-1.03) | 0.781                      | 0.98 (0.84-1.14) | 0.3291                      | 0.95 (0.84-1.06) |
| rs13257714 | 57040111 | 0.7602                      | 0.98 (0.87-1.11) | 0.5539                     | 0.94 (0.78-1.14) | 0.6792                      | 1.03 (0.9-1.18)  |
| rs2667985  | 57042912 | 0.07319                     | 0.87 (0.75-1.01) | 0.3857                     | 0.9 (0.72-1.14)  | 0.4353                      | 0.94 (0.79-1.11) |
| rs1027987  | 57044737 | 0.1981                      | 0.94 (0.85-1.04) | 0.9086                     | 0.99 (0.85-1.16) | 0.3339                      | 0.95 (0.84-1.06) |
| rs1027986  | 57045025 | 0.1982                      | 0.94 (0.85-1.04) | 0.9075                     | 0.99 (0.85-1.16) | 0.333                       | 0.95 (0.84-1.06) |
| rs907423   | 57046172 | 0.197                       | 0.94 (0.85-1.04) | 0.795                      | 0.98 (0.84-1.15) | 0.3549                      | 0.95 (0.84-1.06) |
| rs952784   | 57046643 | 0.6982                      | 0.98 (0.86-1.1)  | 0.5354                     | 0.94 (0.78-1.14) | 0.7683                      | 1.02 (0.89-1.17) |
| rs7838485  | 57048155 | 0.6382                      | 0.97 (0.86-1.1)  | 0.5408                     | 0.94 (0.78-1.14) | 0.8613                      | 1.01 (0.88-1.16) |
| rs2719232  | 57048738 | 0.164                       | 0.93 (0.84-1.03) | 0.8417                     | 0.98 (0.84-1.15) | 0.2883                      | 0.94 (0.84-1.05) |
| rs10101914 | 57049241 | 0.8825                      | 0.99 (0.88-1.12) | 0.6293                     | 0.95 (0.79-1.16) | 0.5916                      | 1.04 (0.9-1.19)  |
| rs16922502 | 57049990 | 0.6697                      | 0.97 (0.86-1.1)  | 0.5539                     | 0.94 (0.78-1.14) | 0.8258                      | 1.02 (0.88-1.17) |
| rs2466007  | 57051741 | 0.1308                      | 0.93 (0.84-1.02) | 0.6735                     | 0.97 (0.83-1.13) | 0.3275                      | 0.94 (0.84-1.06) |
| rs16922508 | 57054784 | 0.4229                      | 0.95 (0.85-1.07) | 0.3865                     | 1.08 (0.91-1.28) | 0.2759                      | 0.93 (0.82-1.06) |
| rs7828483  | 57055442 | 0.5136                      | 0.96 (0.85-1.08) | 0.2359                     | 1.12 (0.93-1.34) | 0.4667                      | 0.95 (0.83-1.09) |
| rs2719246  | 57056975 | 0.06758                     | 0.88 (0.76-1.01) | 0.2579                     | 0.88 (0.7-1.1)   | 0.2419                      | 0.91 (0.78-1.07) |
| rs2667978  | 57060505 | 0.2389                      | 0.93 (0.82-1.05) | 0.9671                     | 1 (0.83-1.21)    | 0.1819                      | 0.91 (0.79-1.05) |
| rs16920176 | 57061690 | 0.8558                      | 1.02 (0.79-1.32) | 0.1902                     | 1.27 (0.89-1.83) | 0.9009                      | 0.98 (0.73-1.31) |
| rs16920186 | 57063272 | 0.8558                      | 1.02 (0.79-1.32) | 0.1902                     | 1.27 (0.89-1.83) | 0.9009                      | 0.98 (0.73-1.31) |
| rs4061077  | 57065996 | 0.3614                      | 0.95 (0.85-1.06) | 0.4658                     | 1.07 (0.9-1.27)  | 0.2516                      | 0.93 (0.81-1.06) |
| rs9650314  | 57066164 | 0.2602                      | 0.93 (0.83-1.05) | 0.9388                     | 1.01 (0.84-1.21) | 0.2258                      | 0.92 (0.8-1.06)  |
| rs16920192 | 57066580 | 0.3459                      | 0.95 (0.84-1.06) | 0.4658                     | 1.07 (0.9-1.27)  | 0.2348                      | 0.92 (0.81-1.05) |
| rs1912818  | 57066875 | 0.3365                      | 0.95 (0.84-1.06) | 0.4753                     | 1.07 (0.9-1.27)  | 0.2437                      | 0.92 (0.81-1.06) |
| rs2719252  | 57067406 | 0.3244                      | 0.94 (0.84-1.06) | 0.5732                     | 1.05 (0.88-1.25) | 0.2426                      | 0.92 (0.81-1.06) |
| rs2719253  | 57067720 | 0.3614                      | 0.95 (0.85-1.06) | 0.4658                     | 1.07 (0.9-1.27)  | 0.2516                      | 0.93 (0.81-1.06) |
| rs2667974  | 57067931 | 0.3591                      | 0.95 (0.84-1.06) | 0.4849                     | 1.07 (0.89-1.27) | 0.2645                      | 0.93 (0.81-1.06) |
| rs10282821 | 57068622 | 0.7212                      | 1.02 (0.91-1.15) | 0.9621                     | 1 (0.83-1.2)     | 0.2628                      | 1.08 (0.94-1.24) |
| rs2667972  | 57069215 | 0.2764                      | 0.93 (0.83-1.06) | 0.9047                     | 1.01 (0.84-1.22) | 0.236                       | 0.92 (0.8-1.06)  |
| rs2719243  | 57069530 | 0.3614                      | 0.95 (0.85-1.06) | 0.4658                     | 1.07 (0.9-1.27)  | 0.2516                      | 0.93 (0.81-1.06) |
| rs2719242  | 57069786 | 0.32                        | 0.94 (0.84-1.06) | 0.537                      | 1.06 (0.89-1.26) | 0.2097                      | 0.92 (0.81-1.05) |
| rs4738466  | 57073255 | <u>0.03687</u>              | 0.85 (0.74-0.99) | 0.2265                     | 0.87 (0.69-1.09) | 0.1829                      | 0.89 (0.75-1.06) |
| rs3106348  | 57079720 | 0.3475                      | 0.95 (0.84-1.06) | 0.6393                     | 1.04 (0.88-1.24) | 0.2711                      | 0.93 (0.82-1.06) |
| rs7824121  | 57084226 | 0.06319                     | 0.87 (0.75-1.01) | 0.2931                     | 0.88 (0.7-1.11)  | 0.2625                      | 0.91 (0.77-1.08) |

**Abbreviations:** SNP, Single Nuclear Polymorphism; BP, Base Position; MAF Case, Minor Allele Frequency in cases; MAF Control, Minor Allele Frequency in Controls; P, p-value; OR, Odds Ratio; C.I., Confidence Interval

\* (# cases/# controls)

Supplemental Table 3 (e). Case-control association analysis when cases stratified based upon ACR criteria

| SNP        | BP       | No Enhancement (1545/1593)* |                  | Neurological Disorders (200/1593) |                  | Oral Ulcer (746/1593) |                  | Serositis (654/1593) |                  |
|------------|----------|-----------------------------|------------------|-----------------------------------|------------------|-----------------------|------------------|----------------------|------------------|
|            |          | P                           | OR (95% C.I.)    | P                                 | OR (95% C.I.)    | P                     | OR (95% C.I.)    | P                    | OR (95% C.I.)    |
| rs3808391  | 56953203 | 0.0545                      | 1.1 (1-1.22)     | 0.1366                            | 0.85 (0.68-1.05) | 0.3655                | 1.06 (0.93-1.2)  | 0.08687              | 1.12 (0.98-1.28) |
| rs182832   | 56953415 | 0.4885                      | 1.05 (0.92-1.18) | 0.3499                            | 1.13 (0.88-1.45) | 0.832                 | 1.02 (0.87-1.19) | 0.5941               | 0.96 (0.81-1.13) |
| rs6983130  | 56955793 | <b>0.0006718</b>            | 0.79 (0.69-0.91) | 0.9704                            | 0.99 (0.75-1.32) | <b>0.02248</b>        | 0.82 (0.7-0.97)  | <b>0.04594</b>       | 0.83 (0.7-1)     |
| rs6474026  | 56956047 | <b>0.013</b>                | 0.85 (0.75-0.97) | 0.3621                            | 1.12 (0.87-1.44) | <b>0.0356</b>         | 0.84 (0.72-0.99) | 0.3206               | 0.92 (0.78-1.08) |
| rs7834615  | 56959994 | 0.1156                      | 1.08 (0.98-1.2)  | 0.191                             | 0.87 (0.7-1.07)  | 0.4823                | 1.05 (0.92-1.19) | 0.1631               | 1.1 (0.96-1.25)  |
| rs16922309 | 56963245 | 0.3053                      | 0.89 (0.7-1.12)  | 0.8874                            | 1.03 (0.65-1.65) | 0.6328                | 0.93 (0.7-1.24)  | 0.957                | 0.99 (0.74-1.33) |
| rs333619   | 56964623 | 0.1413                      | 1.08 (0.98-1.19) | 0.3775                            | 0.91 (0.74-1.12) | 0.9362                | 1.01 (0.89-1.14) | 0.5806               | 1.04 (0.91-1.18) |
| rs7820484  | 56968031 | 0.901                       | 1.02 (0.75-1.39) | 0.2984                            | 1.36 (0.76-2.41) | 0.9124                | 0.98 (0.66-1.44) | 0.2243               | 0.76 (0.49-1.19) |
| rs7005312  | 56968993 | 0.7502                      | 0.98 (0.89-1.09) | 0.0513                            | 1.24 (1-1.54)    | 0.8238                | 1.01 (0.89-1.15) | 0.7229               | 0.98 (0.86-1.11) |
| rs1466138  | 56970495 | 0.2394                      | 0.9 (0.75-1.08)  | 0.1889                            | 0.76 (0.5-1.15)  | 0.8481                | 1.02 (0.82-1.27) | 0.6106               | 0.94 (0.74-1.19) |
| rs7840325  | 56971216 | 0.3255                      | 1.05 (0.95-1.16) | 0.2945                            | 0.89 (0.72-1.1)  | 0.6082                | 0.97 (0.85-1.1)  | 0.1977               | 1.09 (0.96-1.24) |
| rs9643489  | 56972210 | 0.3632                      | 0.92 (0.77-1.1)  | 0.3717                            | 0.84 (0.57-1.23) | 0.9259                | 1.01 (0.82-1.25) | 0.8239               | 0.97 (0.78-1.22) |
| rs7831367  | 56973233 | 0.3795                      | 0.93 (0.78-1.1)  | 0.2361                            | 0.79 (0.53-1.17) | 0.9999                | 1 (0.81-1.24)    | 0.7756               | 0.97 (0.77-1.21) |
| rs1980042  | 56975196 | 0.3248                      | 0.95 (0.86-1.05) | 0.868                             | 1.02 (0.83-1.26) | 0.2126                | 0.92 (0.82-1.05) | 0.1063               | 0.9 (0.79-1.02)  |
| rs1027990  | 56976863 | 0.2639                      | 0.94 (0.85-1.04) | 0.8479                            | 1.02 (0.83-1.26) | 0.1824                | 0.92 (0.81-1.04) | 0.09367              | 0.89 (0.78-1.02) |
| rs1027989  | 56976975 | 0.3265                      | 0.92 (0.77-1.09) | 0.2677                            | 0.8 (0.54-1.19)  | 0.9412                | 1.01 (0.82-1.25) | 0.7396               | 0.96 (0.77-1.21) |
| rs6474030  | 56980702 | 0.5233                      | 0.95 (0.81-1.11) | 0.499                             | 0.89 (0.64-1.25) | 0.7773                | 1.03 (0.85-1.24) | 0.4071               | 0.92 (0.75-1.13) |
| rs4551325  | 56985745 | <b>0.01032</b>              | 0.87 (0.78-0.97) | 0.4542                            | 0.92 (0.73-1.15) | 0.2353                | 0.92 (0.81-1.05) | 0.08736              | 0.89 (0.77-1.02) |
| rs1397976  | 56987939 | <b>0.01184</b>              | 0.87 (0.79-0.97) | 0.3503                            | 0.9 (0.72-1.12)  | 0.282                 | 0.93 (0.82-1.06) | 0.06566              | 0.88 (0.77-1.01) |
| rs6474033  | 56988570 | 0.8182                      | 0.98 (0.84-1.15) | 0.7998                            | 0.96 (0.69-1.34) | 0.5983                | 1.05 (0.87-1.27) | 0.4823               | 0.93 (0.76-1.14) |
| rs10095917 | 56992814 | <b>0.02599</b>              | 0.87 (0.78-0.98) | 0.6433                            | 0.94 (0.74-1.21) | 0.2189                | 0.91 (0.79-1.06) | 0.2052               | 0.9 (0.78-1.06)  |
| rs6985030  | 57007430 | 0.05938                     | 0.88 (0.77-1.01) | 0.7914                            | 1.04 (0.79-1.37) | 0.2187                | 0.9 (0.76-1.07)  | 0.1983               | 0.89 (0.74-1.06) |
| rs16922425 | 57008823 | 0.494                       | 1.04 (0.94-1.14) | 0.3232                            | 0.9 (0.73-1.11)  | 0.713                 | 1.02 (0.9-1.16)  | 0.2852               | 0.93 (0.82-1.06) |
| rs7829816  | 57011940 | <b>0.02829</b>              | 0.87 (0.77-0.99) | 0.9036                            | 0.98 (0.76-1.27) | 0.2812                | 0.92 (0.79-1.07) | 0.1888               | 0.9 (0.77-1.05)  |
| rs2100245  | 57012654 | <b>0.02507</b>              | 0.87 (0.77-0.98) | 0.6809                            | 0.95 (0.74-1.22) | 0.3922                | 0.94 (0.81-1.09) | 0.1447               | 0.89 (0.76-1.04) |
| rs16922459 | 57016726 | <b>0.02683</b>              | 0.86 (0.75-0.98) | 0.5825                            | 0.92 (0.7-1.23)  | 0.1256                | 0.88 (0.74-1.04) | <b>0.04196</b>       | 0.83 (0.69-0.99) |
| rs12334430 | 57022514 | <b>0.03787</b>              | 0.88 (0.77-0.99) | 0.6631                            | 0.94 (0.73-1.23) | 0.2166                | 0.91 (0.78-1.06) | 0.08561              | 0.87 (0.74-1.02) |
| rs16922463 | 57024223 | <b>0.0361</b>               | 0.87 (0.77-0.99) | 0.6948                            | 0.95 (0.73-1.23) | 0.2451                | 0.91 (0.78-1.07) | 0.07716              | 0.86 (0.73-1.02) |
| rs7813271  | 57025705 | <b>0.04089</b>              | 0.88 (0.77-0.99) | 0.6207                            | 0.94 (0.72-1.22) | 0.2691                | 0.92 (0.78-1.07) | 0.08112              | 0.86 (0.73-1.02) |
| rs2292419  | 57029334 | 0.1713                      | 1.08 (0.97-1.2)  | 0.1404                            | 1.18 (0.95-1.48) | 0.5656                | 1.04 (0.91-1.19) | <b>0.01819</b>       | 1.18 (1.03-1.36) |
| rs10089932 | 57029511 | 0.4236                      | 1.05 (0.94-1.17) | 0.2654                            | 1.14 (0.91-1.42) | 0.7856                | 1.02 (0.89-1.17) | 0.09659              | 1.13 (0.98-1.29) |
| rs7828258  | 57030499 | 0.3626                      | 1.05 (0.95-1.16) | 0.2638                            | 0.89 (0.72-1.09) | 0.4184                | 1.05 (0.93-1.19) | 0.8552               | 0.99 (0.87-1.12) |
| rs2668017  | 57032420 | 0.9655                      | 1 (0.9-1.12)     | 0.4084                            | 1.1 (0.87-1.39)  | 0.7976                | 0.98 (0.85-1.13) | 0.3536               | 1.07 (0.93-1.24) |
| rs2719240  | 57032602 | 0.9127                      | 1.01 (0.9-1.12)  | 0.364                             | 1.11 (0.89-1.39) | 0.946                 | 1 (0.87-1.14)    | 0.325                | 1.07 (0.93-1.23) |
| rs2719268  | 57034636 | 0.9311                      | 1.01 (0.9-1.13)  | 0.3257                            | 1.12 (0.89-1.42) | 0.816                 | 0.98 (0.85-1.13) | 0.3035               | 1.08 (0.93-1.25) |
| rs2668021  | 57036101 | 0.2642                      | 0.94 (0.84-1.05) | 0.1442                            | 1.19 (0.94-1.49) | 0.3488                | 0.93 (0.81-1.08) | 0.5175               | 0.95 (0.82-1.1)  |
| rs12114560 | 57037042 | 0.9759                      | 1 (0.77-1.3)     | 0.8384                            | 0.94 (0.54-1.66) | 0.6753                | 1.07 (0.78-1.47) | 0.668                | 0.93 (0.65-1.31) |
| rs2719266  | 57037257 | 0.2152                      | 0.94 (0.85-1.04) | 0.2546                            | 1.13 (0.92-1.39) | 0.2083                | 0.92 (0.82-1.05) | 0.7391               | 0.98 (0.86-1.11) |
| rs2719265  | 57037831 | 0.2358                      | 0.94 (0.85-1.04) | 0.2727                            | 1.12 (0.91-1.38) | 0.2781                | 0.93 (0.83-1.06) | 0.8228               | 0.99 (0.87-1.12) |
| rs907425   | 57038845 | 0.1699                      | 0.93 (0.84-1.03) | 0.3555                            | 1.1 (0.9-1.36)   | 0.3793                | 0.95 (0.84-1.07) | 0.7449               | 0.98 (0.86-1.11) |
| rs1877301  | 57039144 | 0.1799                      | 0.93 (0.85-1.03) | 0.3258                            | 1.11 (0.9-1.37)  | 0.2188                | 0.93 (0.82-1.05) | 0.7327               | 0.98 (0.86-1.11) |
| rs868541   | 57039314 | 0.1722                      | 0.93 (0.84-1.03) | 0.3377                            | 1.11 (0.9-1.36)  | 0.2198                | 0.93 (0.82-1.05) | 0.7391               | 0.98 (0.86-1.11) |
| rs13257714 | 57040111 | 0.7602                      | 0.98 (0.87-1.11) | 0.84                              | 0.97 (0.75-1.26) | 0.853                 | 0.99 (0.85-1.15) | 0.6474               | 1.04 (0.89-1.21) |
| rs2667985  | 57042912 | 0.07319                     | 0.87 (0.75-1.01) | 0.29                              | 0.84 (0.61-1.16) | 0.6191                | 0.95 (0.8-1.15)  | 0.217                | 0.88 (0.73-1.08) |
| rs1027987  | 57044737 | 0.1981                      | 0.94 (0.85-1.04) | 0.2788                            | 1.12 (0.91-1.38) | 0.236                 | 0.93 (0.82-1.05) | 0.7694               | 0.98 (0.86-1.12) |
| rs1027986  | 57045025 | 0.1982                      | 0.94 (0.85-1.04) | 0.2792                            | 1.12 (0.91-1.38) | 0.2353                | 0.93 (0.82-1.05) | 0.7714               | 0.98 (0.86-1.12) |
| rs907423   | 57046172 | 0.197                       | 0.94 (0.85-1.04) | 0.2308                            | 1.14 (0.92-1.4)  | 0.2175                | 0.92 (0.82-1.05) | 0.6649               | 0.97 (0.85-1.11) |
| rs952784   | 57046643 | 0.6982                      | 0.98 (0.86-1.1)  | 0.7351                            | 0.96 (0.74-1.24) | 0.7919                | 0.98 (0.84-1.14) | 0.6655               | 1.04 (0.88-1.21) |
| rs7838485  | 57048155 | 0.6382                      | 0.97 (0.86-1.1)  | 0.7396                            | 0.96 (0.74-1.24) | 0.7594                | 0.98 (0.84-1.14) | 0.786                | 1.02 (0.87-1.2)  |
| rs2719232  | 57048738 | 0.164                       | 0.93 (0.84-1.03) | 0.3317                            | 1.11 (0.9-1.37)  | 0.2275                | 0.93 (0.82-1.05) | 0.6837               | 0.97 (0.86-1.11) |
| rs10101914 | 57049241 | 0.8825                      | 0.99 (0.88-1.12) | 0.7243                            | 1.05 (0.81-1.35) | 0.9811                | 1 (0.86-1.16)    | 0.6301               | 1.04 (0.89-1.22) |
| rs16922502 | 57049990 | 0.6697                      | 0.97 (0.86-1.1)  | 0.7505                            | 0.96 (0.74-1.24) | 0.7949                | 0.98 (0.84-1.14) | 0.7068               | 1.03 (0.88-1.21) |
| rs2466007  | 57051741 | 0.1308                      | 0.93 (0.84-1.02) | 0.322                             | 1.11 (0.9-1.37)  | 0.2598                | 0.93 (0.82-1.05) | 0.6871               | 0.97 (0.86-1.11) |
| rs16922508 | 57054784 | 0.4229                      | 0.95 (0.85-1.07) | 0.1394                            | 1.19 (0.94-1.5)  | 0.3409                | 0.93 (0.81-1.08) | 0.6702               | 0.97 (0.83-1.12) |
| rs7828483  | 57055442 | 0.5136                      | 0.96 (0.85-1.08) | 0.1651                            | 1.19 (0.93-1.51) | 0.2452                | 0.92 (0.79-1.06) | 0.7917               | 0.98 (0.84-1.14) |
| rs2719246  | 57056975 | 0.06758                     | 0.88 (0.76-1.01) | 0.5309                            | 1.1 (0.82-1.46)  | <b>0.0433</b>         | 0.83 (0.7-0.99)  | 0.2734               | 0.9 (0.75-1.09)  |
| rs2667978  | 57060505 | 0.2389                      | 0.93 (0.82-1.05) | 0.2094                            | 1.17 (0.92-1.49) | 0.1758                | 0.9 (0.77-1.05)  | 0.523                | 0.95 (0.81-1.11) |
| rs16920176 | 57061690 | 0.8558                      | 1.02 (0.79-1.32) | 0.9408                            | 1.02 (0.6-1.74)  | 0.8726                | 1.03 (0.75-1.41) | 0.9695               | 0.99 (0.71-1.39) |
| rs16920186 | 57063272 | 0.8558                      | 1.02 (0.79-1.32) | 0.9408                            | 1.02 (0.6-1.74)  | 0.8726                | 1.03 (0.75-1.41) | 0.9695               | 0.99 (0.71-1.39) |
| rs4061077  | 57065996 | 0.3614                      | 0.95 (0.85-1.06) | 0.1627                            | 1.18 (0.94-1.49) | 0.2768                | 0.92 (0.8-1.07)  | 0.5368               | 0.95 (0.82-1.11) |
| rs9650314  | 57066164 | 0.2602                      | 0.93 (0.83-1.05) | 0.1916                            | 1.18 (0.92-1.5)  | 0.1867                | 0.9 (0.77-1.05)  | 0.4668               | 0.94 (0.8-1.11)  |
| rs16920192 | 57066580 | 0.3459                      | 0.95 (0.84-1.06) | 0.1975                            | 1.17 (0.92-1.47) | 0.2554                | 0.92 (0.8-1.06)  | 0.5368               | 0.95 (0.82-1.11) |
| rs1912818  | 57066875 | 0.3365                      | 0.95 (0.84-1.06) | 0.1899                            | 1.17 (0.93-1.48) | 0.2529                | 0.92 (0.8-1.06)  | 0.5153               | 0.95 (0.82-1.11) |
| rs2719252  | 57067406 | 0.3244                      | 0.94 (0.84-1.06) | 0.2631                            | 1.14 (0.9-1.45)  | 0.2267                | 0.91 (0.79-1.06) | 0.4463               | 0.94 (0.81-1.11) |
| rs2719253  | 57067720 | 0.3614                      | 0.95 (0.85-1.06) | 0.1627                            | 1.18 (0.94-1.49) | 0.2768                | 0.92 (0.8-1.07)  | 0.5368               | 0.95 (0.82-1.11) |
| rs2667974  | 57067931 | 0.3591                      | 0.95 (0.84-1.06) | 0.1591                            | 1.18 (0.94-1.5)  | 0.2932                | 0.93 (0.8-1.07)  | 0.5346               | 0.95 (0.82-1.11) |
| rs10282821 | 57068622 | 0.7212                      | 1.02 (0.91-1.15) | 0.8067                            | 0.97 (0.75-1.25) | 0.7733                | 0.98 (0.84-1.14) | 0.3762               | 1.07 (0.92-1.25) |
| rs2667972  | 57069215 | 0.2764                      | 0.93 (0.83-1.06) | 0.1531                            | 1.19 (0.94-1.52) | 0.2087                | 0.91 (0.78-1.06) | 0.5088               | 0.95 (0.81-1.11) |
| rs2719243  | 57069530 | 0.3614                      | 0.95 (0.85-1.06) | 0.1627                            | 1.18 (0.94-1.49) | 0.2768                | 0.92 (0.8-1.07)  | 0.5368               | 0.95 (0.82-1.11) |
| rs2719242  | 57069786 | 0.32                        | 0.94 (0.84-1.06) | 0.1895                            | 1.17 (0.93-1.47) | 0.2606                | 0.92 (0.8-1.06)  | 0.5215               | 0.95 (0.82-1.11) |
| rs4738466  | 57073255 | <b>0.03687</b>              | 0.85 (0.74-0.99) | 0.1858                            | 0.8 (0.58-1.11)  | 0.2669                | 0.9 (0.75-1.08)  | 0.06071              | 0.83 (0.68-1.01) |
| rs3106348  | 57079720 | 0.3475                      | 0.95 (0.84-1.06) | 0.4402                            | 1.1 (0.87-1.38)  | 0.3008                | 0.93 (0.8-1.07)  | 0.479                | 0.95 (0.82-1.1)  |
| rs7824121  | 57084226 | 0.06319                     | 0.87 (0.75-1.01) | 0.2762                            | 0.84 (0.6-1.16)  | 0.3861                | 0.92 (0.77-1.11) | 0.09347              | 0.85 (0.69-1.03) |

Abbreviations: SNP, Single Nuclear Polymorphism; BP, Base Position; MAF Case, Minor Allele Frequency in cases; MAF Control, Minor Allele Frequency in Controls; P, p-value; OR, Odds Ratio; C.I., Confidence Interval

\* (# cases/# controls)
