# Supplementary material
Source: PubMed Central journal article supplement (PMC2750001)
Supplement: NIHMS124089-supplement-Table_4.pdf [file NIHMS124089-supplement-Table_4.pdf]

Supplemental Table 4(a). Logistic Regression with Bioplex 2200 Autoantibodies as Covariate Factors

| SNP        | No subsetting |                  | dsDNA          |                  | Chrom           |                  | Ribosomal P    |                  |
|------------|---------------|------------------|----------------|------------------|-----------------|------------------|----------------|------------------|
|            | P             | OR (95% C.I.)    | P              | OR (95% C.I.)    | P               | OR (95% C.I.)    | P              | OR (95% C.I.)    |
| rs3808391  | 0.4868        | 1.09 (0.86-1.38) | 0.17           | 1.19 (0.93-1.53) | 0.1891          | 1.19 (0.92-1.55) | 0.357          | 1.12 (0.88-1.43) |
| rs182832   | 0.2436        | 1.18 (0.89-1.55) | 0.7303         | 1.05 (0.79-1.41) | 0.4141          | 1.13 (0.84-1.53) | 0.3047         | 1.16 (0.87-1.54) |
| rs6983130  | 0.09639       | 0.75 (0.53-1.05) | <b>0.04162</b> | 0.68 (0.46-0.99) | <b>0.009664</b> | 0.59 (0.39-0.88) | 0.07857        | 0.73 (0.51-1.04) |
| rs6474026  | 0.1041        | 0.79 (0.59-1.05) | 0.05158        | 0.73 (0.53-1)    | <b>0.01154</b>  | 0.65 (0.46-0.91) | 0.06795        | 0.76 (0.56-1.02) |
| rs7834615  | 0.5674        | 1.07 (0.85-1.36) | 0.2113         | 1.17 (0.91-1.51) | 0.2227          | 1.18 (0.91-1.53) | 0.448          | 1.1 (0.86-1.4)   |
| rs16922309 | 0.9725        | 0.99 (0.54-1.83) | 0.762          | 1.1 (0.58-2.09)  | 0.9414          | 1.03 (0.52-2.02) | 0.8892         | 1.05 (0.56-1.95) |
| rs333619   | 0.6749        | 1.05 (0.83-1.33) | 0.2465         | 1.16 (0.9-1.48)  | 0.2878          | 1.15 (0.89-1.49) | 0.3882         | 1.11 (0.88-1.41) |
| rs7820484  | 0.7392        | 1.13 (0.56-2.25) | 0.509          | 1.27 (0.62-2.62) | 0.3662          | 1.4 (0.67-2.92)  | 0.6521         | 1.18 (0.58-2.37) |
| rs7005312  | 0.6041        | 0.94 (0.75-1.18) | 0.2605         | 0.87 (0.68-1.11) | 0.1991          | 0.84 (0.65-1.09) | 0.3071         | 0.88 (0.7-1.12)  |
| rs1466138  | 0.7991        | 1.05 (0.71-1.57) | 0.7867         | 1.06 (0.69-1.62) | 0.6233          | 1.12 (0.72-1.73) | 0.6539         | 1.1 (0.73-1.65)  |
| rs7840325  | 0.5463        | 1.07 (0.85-1.35) | 0.3231         | 1.13 (0.88-1.46) | 0.516           | 1.09 (0.84-1.41) | 0.3631         | 1.12 (0.88-1.41) |
| rs9643489  | 0.6611        | 1.09 (0.74-1.61) | 0.7057         | 1.08 (0.72-1.64) | 0.6012          | 1.12 (0.73-1.72) | 0.5061         | 1.14 (0.77-1.69) |
| rs7831367  | 0.5168        | 1.14 (0.77-1.67) | 0.4613         | 1.17 (0.77-1.76) | 0.3564          | 1.22 (0.8-1.86)  | 0.3753         | 1.19 (0.81-1.76) |
| rs1980042  | 0.4322        | 0.91 (0.73-1.15) | 0.2216         | 0.86 (0.68-1.1)  | 0.3377          | 0.88 (0.69-1.14) | 0.2205         | 0.86 (0.69-1.09) |
| rs1027990  | 0.3049        | 0.89 (0.71-1.12) | 0.1246         | 0.83 (0.65-1.05) | 0.2155          | 0.85 (0.66-1.1)  | 0.1348         | 0.84 (0.66-1.06) |
| rs1027989  | 0.7327        | 1.07 (0.73-1.58) | 0.7168         | 1.08 (0.71-1.63) | 0.61            | 1.12 (0.73-1.72) | 0.5735         | 1.12 (0.76-1.66) |
| rs6474030  | 0.5672        | 1.11 (0.78-1.58) | 0.5414         | 1.13 (0.77-1.65) | 0.5418          | 1.13 (0.76-1.68) | 0.5226         | 1.13 (0.78-1.62) |
| rs4551325  | 0.3701        | 0.89 (0.7-1.14)  | 0.4986         | 0.91 (0.7-1.19)  | 0.2013          | 0.84 (0.63-1.1)  | 0.27           | 0.87 (0.68-1.12) |
| rs1397976  | 0.396         | 0.9 (0.71-1.15)  | 0.4771         | 0.91 (0.7-1.18)  | 0.2033          | 0.84 (0.64-1.1)  | 0.3014         | 0.88 (0.69-1.12) |
| rs6474033  | 0.5672        | 1.11 (0.78-1.58) | 0.5414         | 1.13 (0.77-1.65) | 0.5418          | 1.13 (0.76-1.68) | 0.5226         | 1.13 (0.78-1.62) |
| rs10095917 | 0.1469        | 0.81 (0.61-1.08) | 0.1958         | 0.82 (0.61-1.11) | 0.05234         | 0.73 (0.53-1)    | 0.08493        | 0.77 (0.58-1.04) |
| rs6985030  | 0.2359        | 0.83 (0.61-1.13) | 0.2666         | 0.83 (0.59-1.16) | 0.1138          | 0.75 (0.53-1.07) | 0.1247         | 0.78 (0.56-1.07) |
| rs16922425 | 0.6061        | 0.94 (0.75-1.18) | 0.4823         | 0.92 (0.72-1.17) | 0.1778          | 0.84 (0.65-1.08) | 0.465          | 0.92 (0.73-1.16) |
| rs7829816  | 0.1559        | 0.81 (0.6-1.08)  | 0.269          | 0.84 (0.61-1.15) | 0.06893         | 0.73 (0.53-1.02) | 0.09646        | 0.77 (0.57-1.05) |
| rs2100245  | 0.07343       | 0.77 (0.58-1.03) | 0.1398         | 0.79 (0.59-1.08) | <b>0.03542</b>  | 0.71 (0.51-0.98) | <b>0.04068</b> | 0.73 (0.55-0.99) |
| rs16922459 | 0.1019        | 0.77 (0.57-1.05) | 0.1379         | 0.78 (0.56-1.08) | 0.05101         | 0.7 (0.49-1)     | 0.05703        | 0.73 (0.53-1.01) |
| rs12334430 | 0.2354        | 0.84 (0.63-1.12) | 0.3353         | 0.86 (0.63-1.17) | 0.1221          | 0.77 (0.55-1.07) | 0.1451         | 0.8 (0.59-1.08)  |
| rs16922463 | 0.2103        | 0.83 (0.62-1.11) | 0.3056         | 0.85 (0.63-1.16) | 0.1098          | 0.77 (0.55-1.06) | 0.1287         | 0.79 (0.59-1.07) |
| rs7813271  | 0.2354        | 0.84 (0.63-1.12) | 0.3353         | 0.86 (0.63-1.17) | 0.1221          | 0.77 (0.55-1.07) | 0.1451         | 0.8 (0.59-1.08)  |
| rs2292419  | 0.4034        | 1.11 (0.87-1.42) | 0.8035         | 1.03 (0.79-1.35) | 0.8878          | 1.02 (0.77-1.35) | 0.4095         | 1.11 (0.86-1.43) |
| rs10089932 | 0.4014        | 1.11 (0.87-1.42) | 0.7794         | 1.04 (0.8-1.36)  | 0.9343          | 1.01 (0.77-1.34) | 0.4142         | 1.11 (0.86-1.43) |
| rs7828258  | 0.771         | 0.97 (0.77-1.22) | 0.6225         | 0.94 (0.74-1.2)  | 0.3266          | 0.88 (0.68-1.14) | 0.6642         | 0.95 (0.75-1.2)  |
| rs2668017  | 0.7895        | 1.04 (0.8-1.34)  | 0.9439         | 0.99 (0.75-1.31) | 0.4227          | 0.89 (0.66-1.19) | 0.8295         | 1.03 (0.79-1.35) |
| rs2719240  | 0.5673        | 1.08 (0.84-1.39) | 0.8107         | 1.03 (0.79-1.35) | 0.5984          | 0.93 (0.7-1.23)  | 0.6043         | 1.07 (0.83-1.39) |
| rs2719268  | 0.7151        | 1.05 (0.81-1.36) | 0.9557         | 0.99 (0.75-1.31) | 0.4304          | 0.89 (0.66-1.19) | 0.7481         | 1.04 (0.8-1.36)  |
| rs2668021  | 0.8643        | 0.98 (0.75-1.27) | 0.998          | 1 (0.76-1.32)    | 0.64            | 0.93 (0.7-1.25)  | 0.6716         | 0.94 (0.72-1.23) |
| rs12114560 | 0.6596        | 1.15 (0.62-2.14) | 0.5338         | 1.23 (0.64-2.36) | 0.5742          | 1.22 (0.62-2.4)  | 0.6434         | 1.16 (0.62-2.19) |
| rs2719266  | 0.4544        | 0.92 (0.73-1.15) | 0.5009         | 0.92 (0.72-1.17) | 0.09351         | 0.8 (0.62-1.04)  | 0.3592         | 0.9 (0.71-1.13)  |
| rs2719265  | 0.538         | 0.93 (0.74-1.17) | 0.5598         | 0.93 (0.73-1.18) | 0.09931         | 0.81 (0.63-1.04) | 0.4394         | 0.91 (0.72-1.15) |
| rs907425   | 0.3969        | 0.91 (0.72-1.14) | 0.3999         | 0.9 (0.71-1.15)  | 0.06667         | 0.79 (0.61-1.02) | 0.3126         | 0.89 (0.7-1.12)  |
| rs1877301  | 0.4954        | 0.92 (0.74-1.16) | 0.5528         | 0.93 (0.73-1.18) | 0.09765         | 0.81 (0.63-1.04) | 0.3982         | 0.9 (0.72-1.14)  |
| rs868541   | 0.4954        | 0.92 (0.74-1.16) | 0.5528         | 0.93 (0.73-1.18) | 0.09765         | 0.81 (0.63-1.04) | 0.3982         | 0.9 (0.72-1.14)  |
| rs13257714 | 0.5066        | 0.91 (0.68-1.21) | 0.399          | 0.88 (0.65-1.19) | 0.1291          | 0.78 (0.56-1.08) | 0.5574         | 0.92 (0.69-1.23) |
| rs2667985  | 0.5237        | 1.12 (0.79-1.58) | 0.4809         | 1.14 (0.79-1.64) | 0.3084          | 1.22 (0.84-1.77) | 0.6054         | 1.1 (0.77-1.56)  |
| rs1027987  | 0.538         | 0.93 (0.74-1.17) | 0.5598         | 0.93 (0.73-1.18) | 0.09931         | 0.81 (0.63-1.04) | 0.4394         | 0.91 (0.72-1.15) |
| rs1027986  | 0.538         | 0.93 (0.74-1.17) | 0.5598         | 0.93 (0.73-1.18) | 0.09931         | 0.81 (0.63-1.04) | 0.4394         | 0.91 (0.72-1.15) |
| rs907423   | 0.8316        | 0.98 (0.77-1.23) | 0.8381         | 0.97 (0.76-1.25) | 0.182           | 0.84 (0.65-1.09) | 0.6877         | 0.95 (0.75-1.21) |
| rs952784   | 0.554         | 0.92 (0.69-1.22) | 0.4496         | 0.89 (0.66-1.2)  | 0.1316          | 0.78 (0.56-1.08) | 0.6103         | 0.93 (0.69-1.24) |
| rs7838485  | 0.6017        | 0.93 (0.7-1.23)  | 0.4876         | 0.9 (0.66-1.22)  | 0.146           | 0.78 (0.56-1.09) | 0.6586         | 0.94 (0.7-1.25)  |
| rs2719232  | 0.532         | 0.93 (0.74-1.17) | 0.5882         | 0.94 (0.73-1.19) | 0.1074          | 0.81 (0.63-1.05) | 0.4297         | 0.91 (0.72-1.15) |
| rs10101914 | 0.398         | 0.88 (0.66-1.18) | 0.324          | 0.86 (0.63-1.16) | 0.09984         | 0.76 (0.55-1.05) | 0.451          | 0.89 (0.67-1.2)  |
| rs16922502 | 0.6212        | 0.93 (0.7-1.24)  | 0.5086         | 0.9 (0.67-1.22)  | 0.1559          | 0.79 (0.57-1.1)  | 0.6804         | 0.94 (0.7-1.26)  |
| rs2466007  | 0.4718        | 0.92 (0.74-1.15) | 0.4248         | 0.91 (0.72-1.15) | 0.07331         | 0.8 (0.62-1.02)  | 0.3837         | 0.9 (0.72-1.14)  |
| rs16922508 | 0.6914        | 0.95 (0.73-1.23) | 0.8884         | 0.98 (0.74-1.29) | 0.5635          | 0.92 (0.69-1.23) | 0.5313         | 0.92 (0.7-1.2)   |
| rs7828483  | 0.06756       | 0.74 (0.53-1.02) | 0.07583        | 0.73 (0.51-1.03) | <b>0.04672</b>  | 0.69 (0.48-0.99) | 0.05448        | 0.72 (0.51-1.01) |
| rs2719246  | 0.5531        | 0.91 (0.68-1.23) | 0.6296         | 0.93 (0.68-1.27) | 0.3599          | 0.86 (0.62-1.19) | 0.5165         | 0.9 (0.67-1.22)  |
| rs2667978  | 0.8172        | 0.97 (0.74-1.27) | 0.997          | 1 (0.75-1.34)    | 0.6207          | 0.93 (0.68-1.26) | 0.6382         | 0.93 (0.7-1.24)  |
| rs16920176 | 0.7237        | 0.89 (0.48-1.67) | 0.8128         | 0.92 (0.47-1.79) | 0.8745          | 0.95 (0.47-1.89) | 0.7218         | 0.89 (0.47-1.69) |
| rs16920186 | 0.7237        | 0.89 (0.48-1.67) | 0.8128         | 0.92 (0.47-1.79) | 0.8745          | 0.95 (0.47-1.89) | 0.7218         | 0.89 (0.47-1.69) |
| rs4061077  | 0.6659        | 0.94 (0.73-1.23) | 0.8557         | 0.97 (0.74-1.29) | 0.5875          | 0.92 (0.69-1.23) | 0.5067         | 0.91 (0.7-1.19)  |
| rs9650314  | 0.7637        | 0.96 (0.73-1.26) | 0.9301         | 0.99 (0.74-1.32) | 0.6142          | 0.92 (0.68-1.25) | 0.5855         | 0.92 (0.7-1.23)  |
| rs16920192 | 0.6659        | 0.94 (0.73-1.23) | 0.8557         | 0.97 (0.74-1.29) | 0.5875          | 0.92 (0.69-1.23) | 0.5067         | 0.91 (0.7-1.19)  |
| rs1912818  | 0.6659        | 0.94 (0.73-1.23) | 0.8557         | 0.97 (0.74-1.29) | 0.5875          | 0.92 (0.69-1.23) | 0.5067         | 0.91 (0.7-1.19)  |
| rs2719252  | 0.739         | 0.96 (0.74-1.24) | 0.9265         | 0.99 (0.75-1.3)  | 0.6484          | 0.94 (0.7-1.25)  | 0.5709         | 0.93 (0.71-1.21) |
| rs2719253  | 0.6659        | 0.94 (0.73-1.23) | 0.8557         | 0.97 (0.74-1.29) | 0.5875          | 0.92 (0.69-1.23) | 0.5067         | 0.91 (0.7-1.19)  |
| rs2667974  | 0.4809        | 0.91 (0.7-1.18)  | 0.644          | 0.94 (0.71-1.24) | 0.4064          | 0.88 (0.66-1.18) | 0.3473         | 0.88 (0.67-1.15) |
| rs10282821 | 0.8765        | 0.98 (0.75-1.29) | 0.7131         | 0.95 (0.71-1.27) | 0.2705          | 0.84 (0.61-1.15) | 0.9639         | 1.01 (0.76-1.33) |
| rs2667972  | 0.7637        | 0.96 (0.73-1.26) | 0.9301         | 0.99 (0.74-1.32) | 0.6142          | 0.92 (0.68-1.25) | 0.5855         | 0.92 (0.7-1.23)  |
| rs2719243  | 0.6659        | 0.94 (0.73-1.23) | 0.8557         | 0.97 (0.74-1.29) | 0.5875          | 0.92 (0.69-1.23) | 0.5067         | 0.91 (0.7-1.19)  |
| rs2719242  | 0.7139        | 0.95 (0.73-1.24) | 0.9333         | 0.99 (0.75-1.3)  | 0.6147          | 0.93 (0.7-1.24)  | 0.5569         | 0.92 (0.71-1.21) |
| rs4738466  | 0.9675        | 1.01 (0.72-1.41) | 0.5947         | 1.1 (0.77-1.56)  | 0.618           | 1.1 (0.76-1.58)  | 0.9253         | 1.02 (0.72-1.43) |
| rs3106348  | 0.8133        | 0.97 (0.75-1.26) | 0.9791         | 1 (0.76-1.31)    | 0.7904          | 0.96 (0.72-1.28) | 0.664          | 0.94 (0.72-1.23) |
| rs7824121  | 0.8295        | 1.04 (0.74-1.46) | 0.4865         | 1.13 (0.8-1.62)  | 0.5122          | 1.13 (0.78-1.64) | 0.7919         | 1.05 (0.74-1.48) |

**Abbreviations:** SNP, Single Nuclear Polymorphism; P, p-value; ODDS, Odds Ratio; L95, Lower Bound of 95% Confidence Interval; U95, Upper Bound of 95% Confidence Interval

Supplemental Table 4(b). Logistic Regression with Bioplex 2200 Autoantibodies as Covariate Factors

| SNP        | No subsetting |                  | P              | Sm               |               | P                | RNP A          |                  | RNP 68kD |  |
|------------|---------------|------------------|----------------|------------------|---------------|------------------|----------------|------------------|----------|--|
|            | P             | OR (95% C.I.)    |                | OR (95% C.I.)    | OR (95% C.I.) |                  | P              | OR (95% C.I.)    |          |  |
| rs3808391  | 0.4868        | 1.09 (0.86-1.38) | 0.3987         | 1.11 (0.87-1.42) | 0.3806        | 1.12 (0.87-1.42) | 0.4551         | 1.1 (0.86-1.4)   |          |  |
| rs182832   | 0.2436        | 1.18 (0.89-1.55) | 0.2964         | 1.17 (0.87-1.55) | 0.2451        | 1.18 (0.89-1.57) | 0.2365         | 1.18 (0.9-1.57)  |          |  |
| rs6983130  | 0.09639       | 0.75 (0.53-1.05) | <b>0.03474</b> | 0.67 (0.47-0.97) | 0.05539       | 0.7 (0.49-1.01)  | 0.08887        | 0.74 (0.52-1.05) |          |  |
| rs6474026  | 0.1041        | 0.79 (0.59-1.05) | <b>0.03629</b> | 0.72 (0.53-0.98) | 0.0947        | 0.77 (0.57-1.05) | 0.1095         | 0.79 (0.59-1.06) |          |  |
| rs7834615  | 0.5674        | 1.07 (0.85-1.36) | 0.4495         | 1.1 (0.86-1.41)  | 0.4305        | 1.1 (0.86-1.41)  | 0.5234         | 1.08 (0.85-1.38) |          |  |
| rs16922309 | 0.9725        | 0.99 (0.54-1.83) | 0.8269         | 1.07 (0.57-2.01) | 0.9802        | 1.01 (0.54-1.89) | 0.9456         | 1.02 (0.55-1.9)  |          |  |
| rs333619   | 0.6749        | 1.05 (0.83-1.33) | 0.585          | 1.07 (0.84-1.36) | 0.5204        | 1.08 (0.85-1.38) | 0.5933         | 1.07 (0.84-1.35) |          |  |
| rs7820484  | 0.7392        | 1.13 (0.56-2.25) | 0.5086         | 1.27 (0.63-2.56) | 0.4961        | 1.28 (0.63-2.57) | 0.697          | 1.15 (0.57-2.32) |          |  |
| rs7005312  | 0.6041        | 0.94 (0.75-1.18) | 0.4353         | 0.91 (0.71-1.16) | 0.5619        | 0.93 (0.74-1.18) | 0.585          | 0.94 (0.74-1.18) |          |  |
| rs1466138  | 0.7991        | 1.05 (0.71-1.57) | 0.5506         | 1.13 (0.75-1.71) | 0.8391        | 1.04 (0.69-1.57) | 0.8053         | 1.05 (0.7-1.58)  |          |  |
| rs7840325  | 0.5463        | 1.07 (0.85-1.35) | 0.6906         | 1.05 (0.82-1.34) | 0.6822        | 1.05 (0.83-1.34) | 0.6237         | 1.06 (0.84-1.34) |          |  |
| rs9643489  | 0.6611        | 1.09 (0.74-1.61) | 0.4611         | 1.16 (0.78-1.73) | 0.7622        | 1.06 (0.71-1.59) | 0.7123         | 1.08 (0.73-1.59) |          |  |
| rs7831367  | 0.5168        | 1.14 (0.77-1.67) | 0.3324         | 1.22 (0.82-1.8)  | 0.5908        | 1.12 (0.75-1.66) | 0.5549         | 1.13 (0.76-1.66) |          |  |
| rs1980042  | 0.4322        | 0.91 (0.73-1.15) | 0.2955         | 0.88 (0.69-1.12) | 0.475         | 0.92 (0.73-1.16) | 0.4692         | 0.92 (0.73-1.16) |          |  |
| rs1027990  | 0.3049        | 0.89 (0.71-1.12) | 0.2045         | 0.86 (0.67-1.09) | 0.3457        | 0.89 (0.71-1.13) | 0.3555         | 0.9 (0.71-1.13)  |          |  |
| rs1027989  | 0.7327        | 1.07 (0.73-1.58) | 0.4635         | 1.16 (0.78-1.72) | 0.8462        | 1.04 (0.7-1.55)  | 0.7899         | 1.06 (0.71-1.56) |          |  |
| rs6474030  | 0.5672        | 1.11 (0.78-1.58) | 0.4922         | 1.14 (0.79-1.64) | 0.8802        | 1.03 (0.71-1.49) | 0.7303         | 1.07 (0.74-1.53) |          |  |
| rs4551325  | 0.3701        | 0.89 (0.7-1.14)  | 0.2554         | 0.86 (0.66-1.12) | 0.2457        | 0.86 (0.67-1.11) | 0.3091         | 0.88 (0.68-1.13) |          |  |
| rs1397976  | 0.396         | 0.9 (0.71-1.15)  | 0.2697         | 0.87 (0.67-1.12) | 0.2526        | 0.87 (0.68-1.11) | 0.3042         | 0.88 (0.69-1.12) |          |  |
| rs6474033  | 0.5672        | 1.11 (0.78-1.58) | 0.4922         | 1.14 (0.79-1.64) | 0.8802        | 1.03 (0.71-1.49) | 0.7303         | 1.07 (0.74-1.53) |          |  |
| rs10095917 | 0.1469        | 0.81 (0.61-1.08) | 0.06519        | 0.75 (0.56-1.02) | 0.1471        | 0.81 (0.6-1.08)  | 0.1419         | 0.81 (0.61-1.08) |          |  |
| rs6985030  | 0.2359        | 0.83 (0.61-1.13) | 0.0893         | 0.75 (0.53-1.05) | 0.2743        | 0.84 (0.61-1.15) | 0.2339         | 0.82 (0.6-1.13)  |          |  |
| rs16922425 | 0.6061        | 0.94 (0.75-1.18) | 0.2722         | 0.88 (0.69-1.11) | 0.4147        | 0.91 (0.72-1.15) | 0.44           | 0.91 (0.72-1.15) |          |  |
| rs7829816  | 0.1559        | 0.81 (0.6-1.08)  | 0.06378        | 0.74 (0.54-1.02) | 0.1744        | 0.81 (0.6-1.1)   | 0.1113         | 0.78 (0.58-1.06) |          |  |
| rs2100245  | 0.07343       | 0.77 (0.58-1.03) | <b>0.02711</b> | 0.71 (0.52-0.96) | 0.07871       | 0.77 (0.57-1.03) | <b>0.03875</b> | 0.73 (0.55-0.98) |          |  |
| rs16922459 | 0.1019        | 0.77 (0.57-1.05) | <b>0.03917</b> | 0.7 (0.51-0.98)  | 0.1386        | 0.79 (0.57-1.08) | 0.1009         | 0.77 (0.56-1.05) |          |  |
| rs12334430 | 0.2354        | 0.84 (0.63-1.12) | 0.09515        | 0.77 (0.56-1.05) | 0.2388        | 0.84 (0.62-1.13) | 0.1671         | 0.81 (0.6-1.09)  |          |  |
| rs16922463 | 0.2103        | 0.83 (0.62-1.11) | 0.08392        | 0.76 (0.56-1.04) | 0.215         | 0.83 (0.62-1.12) | 0.1485         | 0.8 (0.6-1.08)   |          |  |
| rs7813271  | 0.2354        | 0.84 (0.63-1.12) | 0.09515        | 0.77 (0.56-1.05) | 0.2388        | 0.84 (0.62-1.13) | 0.1671         | 0.81 (0.6-1.09)  |          |  |
| rs2292419  | 0.4034        | 1.11 (0.87-1.42) | 0.6695         | 1.06 (0.81-1.38) | 0.5839        | 1.07 (0.83-1.39) | 0.496          | 1.09 (0.85-1.41) |          |  |
| rs10089932 | 0.4014        | 1.11 (0.87-1.42) | 0.6838         | 1.06 (0.81-1.37) | 0.5284        | 1.09 (0.84-1.4)  | 0.4998         | 1.09 (0.85-1.41) |          |  |
| rs7828258  | 0.771         | 0.97 (0.77-1.22) | 0.3285         | 0.89 (0.7-1.13)  | 0.6681        | 0.95 (0.75-1.2)  | 0.5522         | 0.93 (0.74-1.18) |          |  |
| rs2668017  | 0.7895        | 1.04 (0.8-1.34)  | 0.9281         | 0.99 (0.75-1.3)  | 0.9642        | 1.01 (0.77-1.32) | 0.9256         | 1.01 (0.78-1.32) |          |  |
| rs2719240  | 0.5673        | 1.08 (0.84-1.39) | 0.9489         | 1.01 (0.77-1.32) | 0.801         | 1.03 (0.8-1.34)  | 0.8013         | 1.03 (0.8-1.34)  |          |  |
| rs2719268  | 0.7151        | 1.05 (0.81-1.36) | 0.9314         | 0.99 (0.75-1.3)  | 0.8759        | 1.02 (0.78-1.34) | 0.8423         | 1.03 (0.79-1.34) |          |  |
| rs2668021  | 0.8643        | 0.98 (0.75-1.27) | 0.4597         | 0.9 (0.69-1.19)  | 0.7814        | 0.96 (0.74-1.26) | 0.5817         | 0.93 (0.71-1.21) |          |  |
| rs12114560 | 0.6596        | 1.15 (0.62-2.14) | 0.7139         | 1.13 (0.59-2.16) | 0.707         | 1.13 (0.6-2.15)  | 0.9257         | 1.03 (0.54-1.97) |          |  |
| rs2719266  | 0.4544        | 0.92 (0.73-1.15) | 0.1834         | 0.85 (0.67-1.08) | 0.427         | 0.91 (0.72-1.15) | 0.3283         | 0.89 (0.71-1.12) |          |  |
| rs2719265  | 0.538         | 0.93 (0.74-1.17) | 0.2111         | 0.86 (0.68-1.09) | 0.5179        | 0.93 (0.73-1.17) | 0.4032         | 0.91 (0.72-1.14) |          |  |
| rs907425   | 0.3969        | 0.91 (0.72-1.14) | 0.1468         | 0.84 (0.66-1.06) | 0.377         | 0.9 (0.71-1.14)  | 0.2549         | 0.87 (0.69-1.1)  |          |  |
| rs1877301  | 0.4954        | 0.92 (0.74-1.16) | 0.2102         | 0.86 (0.68-1.09) | 0.4714        | 0.92 (0.73-1.16) | 0.3647         | 0.9 (0.71-1.13)  |          |  |
| rs868541   | 0.4954        | 0.92 (0.74-1.16) | 0.2102         | 0.86 (0.68-1.09) | 0.4714        | 0.92 (0.73-1.16) | 0.3647         | 0.9 (0.71-1.13)  |          |  |
| rs13257714 | 0.5066        | 0.91 (0.68-1.21) | 0.4242         | 0.89 (0.66-1.19) | 0.5182        | 0.91 (0.68-1.22) | 0.5423         | 0.91 (0.69-1.22) |          |  |
| rs2667985  | 0.5237        | 1.12 (0.79-1.58) | 0.4315         | 1.15 (0.81-1.65) | 0.6731        | 1.08 (0.76-1.54) | 0.5779         | 1.11 (0.78-1.57) |          |  |
| rs1027987  | 0.538         | 0.93 (0.74-1.17) | 0.2111         | 0.86 (0.68-1.09) | 0.5179        | 0.93 (0.73-1.17) | 0.4032         | 0.91 (0.72-1.14) |          |  |
| rs1027986  | 0.538         | 0.93 (0.74-1.17) | 0.2111         | 0.86 (0.68-1.09) | 0.5179        | 0.93 (0.73-1.17) | 0.4032         | 0.91 (0.72-1.14) |          |  |
| rs907423   | 0.8316        | 0.98 (0.77-1.23) | 0.4026         | 0.9 (0.71-1.15)  | 0.7653        | 0.96 (0.76-1.23) | 0.6464         | 0.95 (0.75-1.2)  |          |  |
| rs952784   | 0.554         | 0.92 (0.69-1.22) | 0.473          | 0.9 (0.67-1.21)  | 0.5715        | 0.92 (0.69-1.23) | 0.5937         | 0.92 (0.69-1.23) |          |  |
| rs7838485  | 0.6017        | 0.93 (0.7-1.23)  | 0.5141         | 0.91 (0.67-1.22) | 0.6171        | 0.93 (0.69-1.25) | 0.6418         | 0.93 (0.7-1.25)  |          |  |
| rs2719232  | 0.532         | 0.93 (0.74-1.17) | 0.2301         | 0.86 (0.68-1.1)  | 0.5052        | 0.92 (0.73-1.17) | 0.3947         | 0.9 (0.72-1.14)  |          |  |
| rs10101914 | 0.398         | 0.88 (0.66-1.18) | 0.3381         | 0.86 (0.64-1.17) | 0.3746        | 0.87 (0.65-1.18) | 0.4356         | 0.89 (0.67-1.19) |          |  |
| rs16922502 | 0.6212        | 0.93 (0.7-1.24)  | 0.5343         | 0.91 (0.68-1.23) | 0.6391        | 0.93 (0.69-1.25) | 0.663          | 0.94 (0.7-1.25)  |          |  |
| rs2466007  | 0.4718        | 0.92 (0.74-1.15) | 0.1814         | 0.85 (0.67-1.08) | 0.4851        | 0.92 (0.73-1.16) | 0.3507         | 0.9 (0.71-1.13)  |          |  |
| rs16922508 | 0.6914        | 0.95 (0.73-1.23) | 0.3535         | 0.88 (0.67-1.15) | 0.6807        | 0.95 (0.73-1.23) | 0.5386         | 0.92 (0.71-1.2)  |          |  |
| rs7828483  | 0.06756       | 0.74 (0.53-1.02) | <b>0.02845</b> | 0.68 (0.48-0.96) | 0.1088        | 0.76 (0.54-1.06) | <b>0.04337</b> | 0.71 (0.51-0.99) |          |  |
| rs2719246  | 0.5531        | 0.91 (0.68-1.23) | 0.2772         | 0.84 (0.62-1.15) | 0.4649        | 0.89 (0.66-1.21) | 0.5119         | 0.9 (0.67-1.22)  |          |  |
| rs2667978  | 0.8172        | 0.97 (0.74-1.27) | 0.4396         | 0.89 (0.67-1.19) | 0.8421        | 0.97 (0.73-1.29) | 0.7151         | 0.95 (0.72-1.25) |          |  |
| rs16920176 | 0.7237        | 0.89 (0.48-1.67) | 0.7611         | 0.9 (0.47-1.74)  | 0.6467        | 0.86 (0.45-1.65) | 0.562          | 0.83 (0.43-1.58) |          |  |
| rs16920186 | 0.7237        | 0.89 (0.48-1.67) | 0.7611         | 0.9 (0.47-1.74)  | 0.6467        | 0.86 (0.45-1.65) | 0.562          | 0.83 (0.43-1.58) |          |  |
| rs4061077  | 0.6659        | 0.94 (0.73-1.23) | 0.3524         | 0.88 (0.67-1.15) | 0.6527        | 0.94 (0.72-1.23) | 0.5144         | 0.92 (0.7-1.19)  |          |  |
| rs9650314  | 0.7637        | 0.96 (0.73-1.26) | 0.3943         | 0.88 (0.66-1.18) | 0.7824        | 0.96 (0.73-1.27) | 0.6612         | 0.94 (0.71-1.24) |          |  |
| rs16920192 | 0.6659        | 0.94 (0.73-1.23) | 0.3524         | 0.88 (0.67-1.15) | 0.6527        | 0.94 (0.72-1.23) | 0.5144         | 0.92 (0.7-1.19)  |          |  |
| rs1912818  | 0.6659        | 0.94 (0.73-1.23) | 0.3524         | 0.88 (0.67-1.15) | 0.6527        | 0.94 (0.72-1.23) | 0.5144         | 0.92 (0.7-1.19)  |          |  |
| rs2719252  | 0.739         | 0.96 (0.74-1.24) | 0.4042         | 0.89 (0.68-1.17) | 0.7408        | 0.96 (0.73-1.25) | 0.5791         | 0.93 (0.71-1.21) |          |  |
| rs2719253  | 0.6659        | 0.94 (0.73-1.23) | 0.3524         | 0.88 (0.67-1.15) | 0.6527        | 0.94 (0.72-1.23) | 0.5144         | 0.92 (0.7-1.19)  |          |  |
| rs2667974  | 0.4809        | 0.91 (0.7-1.18)  | 0.2278         | 0.84 (0.64-1.11) | 0.4518        | 0.9 (0.69-1.18)  | 0.3548         | 0.88 (0.68-1.15) |          |  |
| rs10282821 | 0.8765        | 0.98 (0.75-1.29) | 0.8019         | 0.96 (0.73-1.28) | 0.9875        | 1 (0.76-1.33)    | 0.9939         | 1 (0.76-1.32)    |          |  |
| rs2667972  | 0.7637        | 0.96 (0.73-1.26) | 0.3943         | 0.88 (0.66-1.18) | 0.7824        | 0.96 (0.73-1.27) | 0.6612         | 0.94 (0.71-1.24) |          |  |
| rs2719243  | 0.6659        | 0.94 (0.73-1.23) | 0.3524         | 0.88 (0.67-1.15) | 0.6527        | 0.94 (0.72-1.23) | 0.5144         | 0.92 (0.7-1.19)  |          |  |
| rs2719242  | 0.7139        | 0.95 (0.73-1.24) | 0.3981         | 0.89 (0.68-1.17) | 0.7136        | 0.95 (0.73-1.24) | 0.5629         | 0.93 (0.71-1.21) |          |  |
| rs4738466  | 0.9675        | 1.01 (0.72-1.41) | 0.7962         | 1.05 (0.74-1.49) | 0.8693        | 0.97 (0.69-1.38) | 0.9034         | 0.98 (0.69-1.38) |          |  |
| rs3106348  | 0.8133        | 0.97 (0.75-1.26) | 0.4997         | 0.91 (0.69-1.2)  | 0.7995        | 0.97 (0.74-1.26) | 0.6205         | 0.94 (0.72-1.22) |          |  |
| rs7824121  | 0.8295        | 1.04 (0.74-1.46) | 0.669          | 1.08 (0.76-1.54) | 0.9993        | 1 (0.7-1.42)     | 0.9608         | 1.01 (0.71-1.43) |          |  |

**Abbreviations:** SNP, Single Nuclear Polymorphism; P, p-value; ODDS, Odds Ratio; L95, Lower Bound of 95% Confidence Interval; U95, Upper Bound of 95% Confidence Interval

Supplemental Table 4(c). Logistic Regression with Bioplex 2200 Autoantibodies as Covariate Factors

| SNP        | No subsetting |                  | SmRNP   |                  | Ro 52kD/SSA52  |                  | Ro 60kD/SSA60  |                  |
|------------|---------------|------------------|---------|------------------|----------------|------------------|----------------|------------------|
|            | P             | OR (95% C.I.)    | P       | OR (95% C.I.)    | P              | OR (95% C.I.)    | P              | OR (95% C.I.)    |
| rs3808391  | 0.4868        | 1.09 (0.86-1.38) | 0.2812  | 1.15 (0.89-1.48) | 0.2691         | 1.15 (0.9-1.47)  | 0.4            | 1.12 (0.86-1.44) |
| rs182832   | 0.2436        | 1.18 (0.89-1.55) | 0.3726  | 1.14 (0.85-1.53) | 0.5724         | 1.09 (0.81-1.45) | 0.4748         | 1.12 (0.83-1.5)  |
| rs6983130  | 0.09639       | 0.75 (0.53-1.05) | 0.1222  | 0.75 (0.51-1.08) | <b>0.0446</b>  | 0.69 (0.47-0.99) | 0.07746        | 0.71 (0.49-1.04) |
| rs6474026  | 0.1041        | 0.79 (0.59-1.05) | 0.116   | 0.78 (0.57-1.06) | 0.07524        | 0.76 (0.56-1.03) | 0.1226         | 0.78 (0.57-1.07) |
| rs7834615  | 0.5674        | 1.07 (0.85-1.36) | 0.3126  | 1.14 (0.89-1.47) | 0.363          | 1.12 (0.88-1.44) | 0.5077         | 1.09 (0.85-1.41) |
| rs16922309 | 0.9725        | 0.99 (0.54-1.83) | 0.9806  | 0.99 (0.52-1.91) | 0.6909         | 1.14 (0.61-2.13) | 0.8775         | 1.05 (0.55-2.03) |
| rs333619   | 0.6749        | 1.05 (0.83-1.33) | 0.4776  | 1.1 (0.85-1.4)   | 0.3951         | 1.11 (0.87-1.42) | 0.3943         | 1.12 (0.87-1.43) |
| rs7820484  | 0.7392        | 1.13 (0.56-2.25) | 0.8921  | 1.05 (0.5-2.23)  | 0.6335         | 1.19 (0.58-2.44) | 0.7897         | 1.11 (0.52-2.34) |
| rs7005312  | 0.6041        | 0.94 (0.75-1.18) | 0.6717  | 0.95 (0.74-1.21) | 0.2866         | 0.88 (0.69-1.12) | 0.329          | 0.88 (0.69-1.13) |
| rs1466138  | 0.7991        | 1.05 (0.71-1.57) | 0.9123  | 1.02 (0.67-1.58) | 0.6307         | 1.11 (0.73-1.68) | 0.7536         | 1.07 (0.7-1.65)  |
| rs7840325  | 0.5463        | 1.07 (0.85-1.35) | 0.5909  | 1.07 (0.83-1.38) | 0.4276         | 1.1 (0.87-1.41)  | 0.3833         | 1.12 (0.87-1.43) |
| rs9643489  | 0.6611        | 1.09 (0.74-1.61) | 0.7585  | 1.07 (0.7-1.62)  | 0.5136         | 1.14 (0.76-1.71) | 0.5884         | 1.12 (0.74-1.7)  |
| rs7831367  | 0.5168        | 1.14 (0.77-1.67) | 0.5721  | 1.13 (0.74-1.71) | 0.3227         | 1.22 (0.82-1.82) | 0.4214         | 1.18 (0.79-1.78) |
| rs1980042  | 0.4322        | 0.91 (0.73-1.15) | 0.4855  | 0.92 (0.72-1.17) | 0.2783         | 0.88 (0.69-1.11) | 0.3296         | 0.89 (0.69-1.13) |
| rs1027990  | 0.3049        | 0.89 (0.71-1.12) | 0.3884  | 0.9 (0.7-1.15)   | 0.1674         | 0.84 (0.66-1.07) | 0.2171         | 0.86 (0.67-1.1)  |
| rs1027989  | 0.7327        | 1.07 (0.73-1.58) | 0.7608  | 1.07 (0.7-1.62)  | 0.5232         | 1.14 (0.76-1.71) | 0.5986         | 1.12 (0.74-1.69) |
| rs6474030  | 0.5672        | 1.11 (0.78-1.58) | 0.7829  | 1.06 (0.72-1.55) | 0.4831         | 1.14 (0.79-1.66) | 0.6595         | 1.09 (0.74-1.6)  |
| rs4551325  | 0.3701        | 0.89 (0.7-1.14)  | 0.2387  | 0.85 (0.65-1.11) | 0.379          | 0.89 (0.69-1.15) | 0.4549         | 0.9 (0.69-1.18)  |
| rs1397976  | 0.396         | 0.9 (0.71-1.15)  | 0.2489  | 0.86 (0.66-1.11) | 0.4734         | 0.91 (0.71-1.17) | 0.5333         | 0.92 (0.71-1.19) |
| rs6474033  | 0.5672        | 1.11 (0.78-1.58) | 0.7829  | 1.06 (0.72-1.55) | 0.4831         | 1.14 (0.79-1.66) | 0.6595         | 1.09 (0.74-1.6)  |
| rs10095917 | 0.1469        | 0.81 (0.61-1.08) | 0.1233  | 0.79 (0.58-1.07) | 0.1692         | 0.81 (0.61-1.09) | 0.2981         | 0.85 (0.63-1.15) |
| rs6985030  | 0.2359        | 0.83 (0.61-1.13) | 0.2954  | 0.84 (0.6-1.17)  | 0.1749         | 0.8 (0.57-1.11)  | 0.2785         | 0.83 (0.59-1.16) |
| rs16922425 | 0.6061        | 0.94 (0.75-1.18) | 0.3278  | 0.89 (0.69-1.13) | 0.579          | 0.93 (0.74-1.19) | 0.7722         | 0.96 (0.76-1.23) |
| rs7829816  | 0.1559        | 0.81 (0.6-1.08)  | 0.1224  | 0.78 (0.57-1.07) | 0.1116         | 0.78 (0.57-1.06) | 0.2196         | 0.82 (0.6-1.13)  |
| rs2100245  | 0.07343       | 0.77 (0.58-1.03) | 0.05144 | 0.73 (0.54-1)    | 0.06645        | 0.75 (0.56-1.02) | 0.1176         | 0.78 (0.57-1.06) |
| rs16922459 | 0.1019        | 0.77 (0.57-1.05) | 0.1566  | 0.79 (0.56-1.1)  | 0.06968        | 0.74 (0.53-1.03) | 0.1222         | 0.77 (0.55-1.07) |
| rs12334430 | 0.2354        | 0.84 (0.63-1.12) | 0.1924  | 0.81 (0.59-1.11) | 0.134          | 0.79 (0.58-1.08) | 0.2356         | 0.83 (0.6-1.13)  |
| rs16922463 | 0.2103        | 0.83 (0.62-1.11) | 0.1727  | 0.8 (0.59-1.1)   | 0.1193         | 0.78 (0.58-1.07) | 0.2136         | 0.82 (0.6-1.12)  |
| rs7813271  | 0.2354        | 0.84 (0.63-1.12) | 0.1924  | 0.81 (0.59-1.11) | 0.134          | 0.79 (0.58-1.08) | 0.2356         | 0.83 (0.6-1.13)  |
| rs2292419  | 0.4034        | 1.11 (0.87-1.42) | 0.7384  | 1.05 (0.8-1.37)  | 0.4666         | 1.1 (0.85-1.43)  | 0.479          | 1.1 (0.84-1.43)  |
| rs10089932 | 0.4014        | 1.11 (0.87-1.42) | 0.7072  | 1.05 (0.8-1.38)  | 0.48           | 1.1 (0.85-1.43)  | 0.5033         | 1.1 (0.84-1.43)  |
| rs7828258  | 0.771         | 0.97 (0.77-1.22) | 0.4767  | 0.91 (0.71-1.17) | 0.6411         | 0.94 (0.74-1.2)  | 0.7011         | 0.95 (0.75-1.22) |
| rs2668017  | 0.7895        | 1.04 (0.8-1.34)  | 0.8623  | 0.98 (0.74-1.29) | 0.9004         | 1.02 (0.77-1.34) | 0.9603         | 1.01 (0.76-1.33) |
| rs2719240  | 0.5673        | 1.08 (0.84-1.39) | 0.8185  | 0.97 (0.74-1.27) | 0.7658         | 1.04 (0.8-1.36)  | 0.7786         | 1.04 (0.79-1.37) |
| rs2719268  | 0.7151        | 1.05 (0.81-1.36) | 0.8647  | 0.98 (0.74-1.29) | 0.8881         | 1.02 (0.78-1.34) | 0.9482         | 1.01 (0.76-1.34) |
| rs2668021  | 0.8643        | 0.98 (0.75-1.27) | 0.584   | 0.93 (0.7-1.22)  | 0.5521         | 0.92 (0.7-1.21)  | 0.535          | 0.91 (0.69-1.21) |
| rs12114560 | 0.6596        | 1.15 (0.62-2.14) | 0.9242  | 1.03 (0.53-2.03) | 0.7902         | 1.09 (0.57-2.11) | 0.5248         | 1.24 (0.64-2.39) |
| rs2719266  | 0.4544        | 0.92 (0.73-1.15) | 0.2755  | 0.87 (0.68-1.11) | 0.3099         | 0.88 (0.69-1.12) | 0.3596         | 0.89 (0.7-1.14)  |
| rs2719265  | 0.538         | 0.93 (0.74-1.17) | 0.2814  | 0.87 (0.69-1.12) | 0.3539         | 0.89 (0.7-1.14)  | 0.4111         | 0.9 (0.71-1.15)  |
| rs907425   | 0.3969        | 0.91 (0.72-1.14) | 0.1935  | 0.85 (0.67-1.09) | 0.2978         | 0.88 (0.69-1.12) | 0.2922         | 0.88 (0.69-1.12) |
| rs1877301  | 0.4954        | 0.92 (0.74-1.16) | 0.2805  | 0.87 (0.69-1.12) | 0.3486         | 0.89 (0.7-1.13)  | 0.4053         | 0.9 (0.71-1.15)  |
| rs868541   | 0.4954        | 0.92 (0.74-1.16) | 0.2805  | 0.87 (0.69-1.12) | 0.3486         | 0.89 (0.7-1.13)  | 0.4053         | 0.9 (0.71-1.15)  |
| rs13257714 | 0.5066        | 0.91 (0.68-1.21) | 0.3666  | 0.87 (0.64-1.18) | 0.6618         | 0.94 (0.7-1.26)  | 0.6117         | 0.92 (0.68-1.25) |
| rs2667985  | 0.5237        | 1.12 (0.79-1.58) | 0.7298  | 1.07 (0.74-1.54) | 0.2701         | 1.23 (0.85-1.76) | 0.3807         | 1.18 (0.81-1.72) |
| rs1027987  | 0.538         | 0.93 (0.74-1.17) | 0.2814  | 0.87 (0.69-1.12) | 0.3539         | 0.89 (0.7-1.14)  | 0.4111         | 0.9 (0.71-1.15)  |
| rs1027986  | 0.538         | 0.93 (0.74-1.17) | 0.2814  | 0.87 (0.69-1.12) | 0.3539         | 0.89 (0.7-1.14)  | 0.4111         | 0.9 (0.71-1.15)  |
| rs907423   | 0.8316        | 0.98 (0.77-1.23) | 0.493   | 0.92 (0.71-1.18) | 0.6449         | 0.94 (0.74-1.21) | 0.7052         | 0.95 (0.74-1.22) |
| rs952784   | 0.554         | 0.92 (0.69-1.22) | 0.4148  | 0.88 (0.65-1.2)  | 0.6702         | 0.94 (0.7-1.26)  | 0.6196         | 0.93 (0.68-1.26) |
| rs7838485  | 0.6017        | 0.93 (0.7-1.23)  | 0.4518  | 0.89 (0.65-1.21) | 0.7188         | 0.95 (0.7-1.28)  | 0.6642         | 0.93 (0.69-1.27) |
| rs2719232  | 0.532         | 0.93 (0.74-1.17) | 0.3043  | 0.88 (0.69-1.12) | 0.3765         | 0.9 (0.71-1.14)  | 0.4344         | 0.91 (0.71-1.16) |
| rs10101914 | 0.398         | 0.88 (0.66-1.18) | 0.2929  | 0.85 (0.62-1.15) | 0.557          | 0.91 (0.68-1.23) | 0.5045         | 0.9 (0.66-1.23)  |
| rs16922502 | 0.6212        | 0.93 (0.7-1.24)  | 0.4718  | 0.89 (0.66-1.22) | 0.7433         | 0.95 (0.71-1.28) | 0.6898         | 0.94 (0.69-1.28) |
| rs2466007  | 0.4718        | 0.92 (0.74-1.15) | 0.2721  | 0.87 (0.69-1.11) | 0.4285         | 0.91 (0.72-1.15) | 0.3966         | 0.9 (0.71-1.15)  |
| rs16922508 | 0.6914        | 0.95 (0.73-1.23) | 0.512   | 0.91 (0.69-1.2)  | 0.3963         | 0.89 (0.68-1.17) | 0.4772         | 0.9 (0.68-1.2)   |
| rs7828483  | 0.06756       | 0.74 (0.53-1.02) | 0.07691 | 0.73 (0.51-1.04) | <b>0.02651</b> | 0.68 (0.48-0.96) | <b>0.04405</b> | 0.69 (0.49-0.99) |
| rs2719246  | 0.5531        | 0.91 (0.68-1.23) | 0.3634  | 0.86 (0.63-1.19) | 0.3884         | 0.87 (0.64-1.19) | 0.4434         | 0.88 (0.64-1.22) |
| rs2667978  | 0.8172        | 0.97 (0.74-1.27) | 0.7545  | 0.95 (0.71-1.28) | 0.5029         | 0.91 (0.68-1.21) | 0.4952         | 0.9 (0.67-1.22)  |
| rs16920176 | 0.7237        | 0.89 (0.48-1.67) | 0.5477  | 0.81 (0.41-1.61) | 0.552          | 0.82 (0.42-1.6)  | 0.8109         | 0.92 (0.47-1.81) |
| rs16920186 | 0.7237        | 0.89 (0.48-1.67) | 0.5477  | 0.81 (0.41-1.61) | 0.552          | 0.82 (0.42-1.6)  | 0.8109         | 0.92 (0.47-1.81) |
| rs4061077  | 0.6659        | 0.94 (0.73-1.23) | 0.5365  | 0.92 (0.7-1.21)  | 0.3738         | 0.88 (0.67-1.16) | 0.4501         | 0.9 (0.68-1.19)  |
| rs9650314  | 0.7637        | 0.96 (0.73-1.26) | 0.692   | 0.94 (0.7-1.26)  | 0.4959         | 0.9 (0.68-1.21)  | 0.4883         | 0.9 (0.67-1.21)  |
| rs16920192 | 0.6659        | 0.94 (0.73-1.23) | 0.5365  | 0.92 (0.7-1.21)  | 0.3738         | 0.88 (0.67-1.16) | 0.4501         | 0.9 (0.68-1.19)  |
| rs1912818  | 0.6659        | 0.94 (0.73-1.23) | 0.5365  | 0.92 (0.7-1.21)  | 0.3738         | 0.88 (0.67-1.16) | 0.4501         | 0.9 (0.68-1.19)  |
| rs2719252  | 0.739         | 0.96 (0.74-1.24) | 0.5988  | 0.93 (0.7-1.22)  | 0.4267         | 0.89 (0.68-1.18) | 0.5063         | 0.91 (0.68-1.21) |
| rs2719253  | 0.6659        | 0.94 (0.73-1.23) | 0.5365  | 0.92 (0.7-1.21)  | 0.3738         | 0.88 (0.67-1.16) | 0.4501         | 0.9 (0.68-1.19)  |
| rs2667974  | 0.4809        | 0.91 (0.7-1.18)  | 0.3697  | 0.88 (0.67-1.16) | 0.2582         | 0.85 (0.65-1.12) | 0.2782         | 0.85 (0.64-1.14) |
| rs10282821 | 0.8765        | 0.98 (0.75-1.29) | 0.7715  | 0.96 (0.72-1.28) | 0.9921         | 1 (0.75-1.33)    | 0.9523         | 1.01 (0.75-1.35) |
| rs2667972  | 0.7637        | 0.96 (0.73-1.26) | 0.692   | 0.94 (0.7-1.26)  | 0.4959         | 0.9 (0.68-1.21)  | 0.4883         | 0.9 (0.67-1.21)  |
| rs2719243  | 0.6659        | 0.94 (0.73-1.23) | 0.5365  | 0.92 (0.7-1.21)  | 0.3738         | 0.88 (0.67-1.16) | 0.4501         | 0.9 (0.68-1.19)  |
| rs2719242  | 0.7139        | 0.95 (0.73-1.24) | 0.6012  | 0.93 (0.7-1.22)  | 0.387          | 0.89 (0.67-1.17) | 0.4703         | 0.9 (0.68-1.2)   |
| rs4738466  | 0.9675        | 1.01 (0.72-1.41) | 0.8639  | 0.97 (0.68-1.39) | 0.6368         | 1.09 (0.77-1.55) | 0.8024         | 1.05 (0.73-1.5)  |
| rs3106348  | 0.8133        | 0.97 (0.75-1.26) | 0.7402  | 0.95 (0.72-1.26) | 0.4528         | 0.9 (0.68-1.18)  | 0.4662         | 0.9 (0.68-1.2)   |
| rs7824121  | 0.8295        | 1.04 (0.74-1.46) | 0.9919  | 1 (0.69-1.44)    | 0.5215         | 1.12 (0.79-1.6)  | 0.6814         | 1.08 (0.75-1.56) |

Abbreviations: SNP, Single Nuclear Polymorphism; P, p-value; OR, Odds Ratio; L95, Lower Bound of 95% Confidence Interval; U95, Upper Bound of 95% Confidence Interval

Supplemental Table 4(d). Logistic Regression with Bioplex 2200 Autoantibodies as Covariate Factors

| SNP        | No subsetting |                  | La/SSB         |                  | Centromere B |                  | Scf-70  |                  |
|------------|---------------|------------------|----------------|------------------|--------------|------------------|---------|------------------|
|            | P             | OR (95% C.I.)    | P              | OR (95% C.I.)    | P            | OR (95% C.I.)    | P       | OR (95% C.I.)    |
| rs3808391  | 0.4868        | 1.09 (0.86-1.38) | 0.5627         | 1.08 (0.84-1.37) | 0.5304       | 1.08 (0.85-1.38) | 0.4651  | 1.09 (0.86-1.39) |
| rs182832   | 0.2436        | 1.18 (0.89-1.55) | 0.4196         | 1.13 (0.84-1.5)  | 0.3318       | 1.15 (0.87-1.52) | 0.2432  | 1.18 (0.89-1.56) |
| rs6983130  | 0.09639       | 0.75 (0.53-1.05) | 0.1073         | 0.74 (0.52-1.07) | 0.1642       | 0.78 (0.55-1.11) | 0.1181  | 0.76 (0.53-1.07) |
| rs6474026  | 0.1041        | 0.79 (0.59-1.05) | 0.1517         | 0.8 (0.59-1.08)  | 0.1457       | 0.8 (0.6-1.08)   | 0.1406  | 0.8 (0.6-1.08)   |
| rs7834615  | 0.5674        | 1.07 (0.85-1.36) | 0.6196         | 1.06 (0.83-1.36) | 0.6423       | 1.06 (0.83-1.35) | 0.5372  | 1.08 (0.85-1.37) |
| rs16922309 | 0.9725        | 0.99 (0.54-1.83) | 0.8624         | 1.06 (0.56-1.99) | 0.9448       | 1.02 (0.55-1.9)  | 0.9954  | 1 (0.54-1.86)    |
| rs333619   | 0.6749        | 1.05 (0.83-1.33) | 0.4917         | 1.09 (0.86-1.38) | 0.717        | 1.04 (0.83-1.32) | 0.5937  | 1.07 (0.84-1.35) |
| rs7820484  | 0.7392        | 1.13 (0.56-2.25) | 0.6786         | 1.16 (0.57-2.38) | 0.6944       | 1.15 (0.57-2.32) | 0.7344  | 1.13 (0.56-2.27) |
| rs7005312  | 0.6041        | 0.94 (0.75-1.18) | 0.3888         | 0.9 (0.71-1.14)  | 0.6945       | 0.95 (0.76-1.21) | 0.6248  | 0.94 (0.75-1.19) |
| rs1466138  | 0.7991        | 1.05 (0.71-1.57) | 0.7083         | 1.08 (0.71-1.64) | 0.6612       | 1.09 (0.73-1.64) | 0.8579  | 1.04 (0.69-1.56) |
| rs7840325  | 0.5463        | 1.07 (0.85-1.35) | 0.4078         | 1.11 (0.87-1.41) | 0.7742       | 1.04 (0.82-1.31) | 0.5912  | 1.07 (0.84-1.35) |
| rs9643489  | 0.6611        | 1.09 (0.74-1.61) | 0.5252         | 1.14 (0.76-1.7)  | 0.5195       | 1.14 (0.77-1.68) | 0.6983  | 1.08 (0.73-1.6)  |
| rs7831367  | 0.5168        | 1.14 (0.77-1.67) | 0.4348         | 1.17 (0.79-1.75) | 0.4362       | 1.17 (0.79-1.72) | 0.5444  | 1.13 (0.76-1.67) |
| rs1980042  | 0.4322        | 0.91 (0.73-1.15) | 0.2792         | 0.88 (0.69-1.11) | 0.4939       | 0.92 (0.73-1.16) | 0.5112  | 0.93 (0.74-1.16) |
| rs1027990  | 0.3049        | 0.89 (0.71-1.12) | 0.1705         | 0.85 (0.67-1.07) | 0.3746       | 0.9 (0.71-1.14)  | 0.3643  | 0.9 (0.71-1.13)  |
| rs1027989  | 0.7327        | 1.07 (0.73-1.58) | 0.5988         | 1.11 (0.75-1.66) | 0.5865       | 1.11 (0.75-1.65) | 0.7744  | 1.06 (0.71-1.57) |
| rs6474030  | 0.5672        | 1.11 (0.78-1.58) | 0.5647         | 1.12 (0.77-1.62) | 0.4866       | 1.14 (0.79-1.63) | 0.6059  | 1.1 (0.77-1.58)  |
| rs4551325  | 0.3701        | 0.89 (0.7-1.14)  | 0.4578         | 0.91 (0.7-1.17)  | 0.5346       | 0.92 (0.72-1.19) | 0.37    | 0.89 (0.7-1.14)  |
| rs1397976  | 0.396         | 0.9 (0.71-1.15)  | 0.5459         | 0.93 (0.72-1.19) | 0.5491       | 0.93 (0.73-1.18) | 0.4179  | 0.91 (0.71-1.15) |
| rs6474033  | 0.5672        | 1.11 (0.78-1.58) | 0.5647         | 1.12 (0.77-1.62) | 0.4866       | 1.14 (0.79-1.63) | 0.6059  | 1.1 (0.77-1.58)  |
| rs10095917 | 0.1469        | 0.81 (0.61-1.08) | 0.2534         | 0.84 (0.63-1.13) | 0.2109       | 0.83 (0.63-1.11) | 0.175   | 0.82 (0.62-1.09) |
| rs6985030  | 0.2359        | 0.83 (0.61-1.13) | 0.2691         | 0.83 (0.6-1.15)  | 0.3379       | 0.86 (0.62-1.18) | 0.2476  | 0.83 (0.61-1.14) |
| rs16922425 | 0.6061        | 0.94 (0.75-1.18) | 0.7477         | 0.96 (0.76-1.22) | 0.4525       | 0.92 (0.73-1.15) | 0.5588  | 0.93 (0.74-1.18) |
| rs7829816  | 0.1559        | 0.81 (0.6-1.08)  | 0.1444         | 0.8 (0.59-1.08)  | 0.1973       | 0.82 (0.61-1.11) | 0.1515  | 0.81 (0.6-1.08)  |
| rs2100245  | 0.07343       | 0.77 (0.58-1.03) | 0.08491        | 0.77 (0.57-1.04) | 0.1042       | 0.79 (0.59-1.05) | 0.07538 | 0.77 (0.58-1.03) |
| rs16922459 | 0.1019        | 0.77 (0.57-1.05) | 0.1009         | 0.76 (0.55-1.05) | 0.1581       | 0.8 (0.58-1.09)  | 0.1082  | 0.77 (0.57-1.06) |
| rs12334430 | 0.2354        | 0.84 (0.63-1.12) | 0.1748         | 0.81 (0.6-1.1)   | 0.2805       | 0.85 (0.63-1.14) | 0.2236  | 0.83 (0.62-1.12) |
| rs16922463 | 0.2103        | 0.83 (0.62-1.11) | 0.1563         | 0.8 (0.59-1.09)  | 0.2525       | 0.84 (0.63-1.13) | 0.1999  | 0.83 (0.62-1.11) |
| rs7813271  | 0.2354        | 0.84 (0.63-1.12) | 0.1748         | 0.81 (0.6-1.1)   | 0.2805       | 0.85 (0.63-1.14) | 0.2236  | 0.83 (0.62-1.12) |
| rs2292419  | 0.4034        | 1.11 (0.87-1.42) | 0.4122         | 1.11 (0.86-1.44) | 0.6524       | 1.06 (0.82-1.37) | 0.4787  | 1.1 (0.85-1.41)  |
| rs10089932 | 0.4014        | 1.11 (0.87-1.42) | 0.3277         | 1.14 (0.88-1.47) | 0.618        | 1.07 (0.83-1.38) | 0.4804  | 1.1 (0.85-1.41)  |
| rs7828258  | 0.771         | 0.97 (0.77-1.22) | 0.8189         | 0.97 (0.77-1.23) | 0.6422       | 0.95 (0.75-1.2)  | 0.6902  | 0.95 (0.76-1.2)  |
| rs2668017  | 0.7895        | 1.04 (0.8-1.34)  | 0.8205         | 1.03 (0.79-1.35) | 0.9843       | 1 (0.77-1.31)    | 0.9226  | 1.01 (0.78-1.32) |
| rs2719240  | 0.5673        | 1.08 (0.84-1.39) | 0.6836         | 1.06 (0.81-1.38) | 0.7996       | 1.03 (0.8-1.34)  | 0.7134  | 1.05 (0.81-1.36) |
| rs2719268  | 0.7151        | 1.05 (0.81-1.36) | 0.7349         | 1.05 (0.8-1.37)  | 0.9003       | 1.02 (0.78-1.33) | 0.841   | 1.03 (0.79-1.34) |
| rs2668021  | 0.8643        | 0.98 (0.75-1.27) | 0.6905         | 0.95 (0.72-1.24) | 0.9369       | 0.99 (0.76-1.29) | 0.7993  | 0.97 (0.74-1.26) |
| rs12114560 | 0.6596        | 1.15 (0.62-2.14) | 0.9589         | 1.02 (0.53-1.97) | 0.7849       | 1.09 (0.58-2.06) | 0.7216  | 1.12 (0.6-2.11)  |
| rs2719266  | 0.4544        | 0.92 (0.73-1.15) | 0.3626         | 0.9 (0.71-1.14)  | 0.4186       | 0.91 (0.72-1.15) | 0.416   | 0.91 (0.72-1.15) |
| rs2719265  | 0.538         | 0.93 (0.74-1.17) | 0.4481         | 0.91 (0.72-1.16) | 0.5034       | 0.92 (0.73-1.16) | 0.4991  | 0.92 (0.73-1.16) |
| rs907425   | 0.3969        | 0.91 (0.72-1.14) | 0.3747         | 0.9 (0.71-1.14)  | 0.3879       | 0.9 (0.72-1.14)  | 0.3781  | 0.9 (0.72-1.13)  |
| rs1877301  | 0.4954        | 0.92 (0.74-1.16) | 0.4042         | 0.9 (0.71-1.15)  | 0.46         | 0.92 (0.73-1.16) | 0.4567  | 0.92 (0.73-1.15) |
| rs868541   | 0.4954        | 0.92 (0.74-1.16) | 0.4042         | 0.9 (0.71-1.15)  | 0.46         | 0.92 (0.73-1.16) | 0.4567  | 0.92 (0.73-1.15) |
| rs13257714 | 0.5066        | 0.91 (0.68-1.21) | 0.6432         | 0.93 (0.69-1.25) | 0.4355       | 0.89 (0.67-1.19) | 0.5404  | 0.91 (0.69-1.22) |
| rs2667985  | 0.5237        | 1.12 (0.79-1.58) | 0.4278         | 1.16 (0.8-1.67)  | 0.4623       | 1.14 (0.8-1.62)  | 0.5827  | 1.1 (0.78-1.57)  |
| rs1027987  | 0.538         | 0.93 (0.74-1.17) | 0.4481         | 0.91 (0.72-1.16) | 0.5034       | 0.92 (0.73-1.16) | 0.4991  | 0.92 (0.73-1.16) |
| rs1027986  | 0.538         | 0.93 (0.74-1.17) | 0.4481         | 0.91 (0.72-1.16) | 0.5034       | 0.92 (0.73-1.16) | 0.4991  | 0.92 (0.73-1.16) |
| rs907423   | 0.8316        | 0.98 (0.77-1.23) | 0.7227         | 0.96 (0.75-1.22) | 0.7725       | 0.97 (0.76-1.22) | 0.7727  | 0.97 (0.76-1.22) |
| rs952784   | 0.554         | 0.92 (0.69-1.22) | 0.6523         | 0.93 (0.7-1.25)  | 0.4815       | 0.9 (0.68-1.2)   | 0.5909  | 0.92 (0.69-1.23) |
| rs7838485  | 0.6017        | 0.93 (0.7-1.23)  | 0.7005         | 0.94 (0.7-1.27)  | 0.5243       | 0.91 (0.68-1.22) | 0.6392  | 0.93 (0.7-1.25)  |
| rs2719232  | 0.532         | 0.93 (0.74-1.17) | 0.4348         | 0.91 (0.72-1.15) | 0.4945       | 0.92 (0.73-1.16) | 0.4912  | 0.92 (0.73-1.16) |
| rs10101914 | 0.398         | 0.88 (0.66-1.18) | 0.5242         | 0.91 (0.67-1.22) | 0.3414       | 0.87 (0.65-1.16) | 0.4319  | 0.89 (0.67-1.19) |
| rs16922502 | 0.6212        | 0.93 (0.7-1.24)  | 0.7243         | 0.95 (0.71-1.28) | 0.5434       | 0.91 (0.68-1.22) | 0.66    | 0.94 (0.7-1.25)  |
| rs2466007  | 0.4718        | 0.92 (0.74-1.15) | 0.524          | 0.93 (0.73-1.17) | 0.5022       | 0.93 (0.74-1.16) | 0.4644  | 0.92 (0.73-1.15) |
| rs16922508 | 0.6914        | 0.95 (0.73-1.23) | 0.4993         | 0.91 (0.69-1.2)  | 0.6513       | 0.94 (0.72-1.22) | 0.6168  | 0.94 (0.72-1.22) |
| rs7828483  | 0.06756       | 0.74 (0.53-1.02) | <b>0.02528</b> | 0.67 (0.48-0.95) | 0.06629      | 0.73 (0.52-1.02) | 0.06568 | 0.73 (0.52-1.02) |
| rs2719246  | 0.5531        | 0.91 (0.68-1.23) | 0.4508         | 0.89 (0.65-1.21) | 0.6206       | 0.93 (0.69-1.25) | 0.5281  | 0.91 (0.67-1.23) |
| rs2667978  | 0.8172        | 0.97 (0.74-1.27) | 0.6685         | 0.94 (0.7-1.25)  | 0.8378       | 0.97 (0.74-1.28) | 0.7667  | 0.96 (0.73-1.26) |
| rs16920176 | 0.7237        | 0.89 (0.48-1.67) | 0.4159         | 0.76 (0.38-1.49) | 0.5832       | 0.83 (0.44-1.59) | 0.6498  | 0.86 (0.46-1.63) |
| rs16920186 | 0.7237        | 0.89 (0.48-1.67) | 0.4159         | 0.76 (0.38-1.49) | 0.5832       | 0.83 (0.44-1.59) | 0.6498  | 0.86 (0.46-1.63) |
| rs4061077  | 0.6659        | 0.94 (0.73-1.23) | 0.4535         | 0.9 (0.69-1.18)  | 0.6251       | 0.94 (0.72-1.22) | 0.5915  | 0.93 (0.72-1.21) |
| rs9650314  | 0.7637        | 0.96 (0.73-1.26) | 0.6596         | 0.94 (0.7-1.25)  | 0.7811       | 0.96 (0.73-1.27) | 0.7124  | 0.95 (0.72-1.25) |
| rs16920192 | 0.6659        | 0.94 (0.73-1.23) | 0.4535         | 0.9 (0.69-1.18)  | 0.6251       | 0.94 (0.72-1.22) | 0.5915  | 0.93 (0.72-1.21) |
| rs1912818  | 0.6659        | 0.94 (0.73-1.23) | 0.4535         | 0.9 (0.69-1.18)  | 0.6251       | 0.94 (0.72-1.22) | 0.5915  | 0.93 (0.72-1.21) |
| rs2719252  | 0.739         | 0.96 (0.74-1.24) | 0.5129         | 0.91 (0.69-1.2)  | 0.6953       | 0.95 (0.73-1.24) | 0.6607  | 0.94 (0.73-1.23) |
| rs2719253  | 0.6659        | 0.94 (0.73-1.23) | 0.4535         | 0.9 (0.69-1.18)  | 0.6251       | 0.94 (0.72-1.22) | 0.5915  | 0.93 (0.72-1.21) |
| rs2667974  | 0.4809        | 0.91 (0.7-1.18)  | 0.2827         | 0.86 (0.65-1.13) | 0.4454       | 0.9 (0.69-1.18)  | 0.4182  | 0.9 (0.69-1.17)  |
| rs10282821 | 0.8765        | 0.98 (0.75-1.29) | 0.9836         | 1 (0.76-1.33)    | 0.728        | 0.95 (0.72-1.26) | 0.9385  | 0.99 (0.75-1.3)  |
| rs2667972  | 0.7637        | 0.96 (0.73-1.26) | 0.6596         | 0.94 (0.7-1.25)  | 0.7811       | 0.96 (0.73-1.27) | 0.7124  | 0.95 (0.72-1.25) |
| rs2719243  | 0.6659        | 0.94 (0.73-1.23) | 0.4535         | 0.9 (0.69-1.18)  | 0.6251       | 0.94 (0.72-1.22) | 0.5915  | 0.93 (0.72-1.21) |
| rs2719242  | 0.7139        | 0.95 (0.73-1.24) | 0.4679         | 0.9 (0.69-1.19)  | 0.6778       | 0.95 (0.73-1.23) | 0.6412  | 0.94 (0.72-1.22) |
| rs4738466  | 0.9675        | 1.01 (0.72-1.41) | 0.916          | 1.02 (0.72-1.45) | 0.8896       | 1.02 (0.73-1.44) | 0.907   | 0.98 (0.7-1.38)  |
| rs3106348  | 0.8133        | 0.97 (0.75-1.26) | 0.5386         | 0.92 (0.7-1.21)  | 0.7436       | 0.96 (0.73-1.25) | 0.7453  | 0.96 (0.74-1.25) |
| rs7824121  | 0.8295        | 1.04 (0.74-1.46) | 0.7848         | 1.05 (0.73-1.5)  | 0.7563       | 1.06 (0.75-1.49) | 0.9566  | 1.01 (0.71-1.43) |

**Abbreviations:** SNP, Single Nuclear Polymorphism; P, p-value; ODDS, Odds Ratio; L95, Lower Bound of 95% Confidence Interval; U95, Upper Bound of 95% Confidence Interval
