# Supplementary material
Source: PubMed Central journal article supplement (PMC2750001)
Supplement: NIHMS124089-supplement-Table_5s.pdf [file NIHMS124089-supplement-Table_5s.pdf]

Table 5s. Frequency of BioPlex 2200 Autoantibodies in Female Cases and Controls Used in Covariate Analysis

| <i>Autoantibody</i>  | <i>Frequency in Cases (n=301)</i> |          | <i>Frequency in Controls (n=298)</i> |          | <i>Chi-square p-value<sup>a</sup></i> |
|----------------------|-----------------------------------|----------|--------------------------------------|----------|---------------------------------------|
|                      | <i>+</i>                          | <i>-</i> | <i>+</i>                             | <i>-</i> |                                       |
| <i>dsDNA</i>         | 0.33                              | 0.67     | 0.02                                 | 0.98     | 1.42E-23                              |
| <i>Chrom</i>         | 0.46                              | 0.54     | 0.04                                 | 0.96     | 3.53E-33                              |
| <i>RNP A</i>         | 0.25                              | 0.75     | 0.03                                 | 0.97     | 6.42E-15                              |
| <i>La/SSB</i>        | 0.23                              | 0.77     | 0.01                                 | 0.99     | 6.87E-16                              |
| <i>Ro 52kD/SSA52</i> | 0.27                              | 0.73     | 0.01                                 | 0.99     | 1.34E-19                              |
| <i>Scl70</i>         | 0.13                              | 0.87     | 0.01                                 | 0.99     | 1.80E-08                              |
| <i>Sm</i>            | 0.26                              | 0.74     | 0.01                                 | 0.99     | 9.55E-19                              |
| <i>Centromere B</i>  | 0.13                              | 0.87     | 0.01                                 | 0.99     | 5.80E-09                              |
| <i>SmRNP</i>         | 0.29                              | 0.71     | 0.01                                 | 0.99     | 6.34E-22                              |
| <i>Ribosomal P</i>   | 0.16                              | 0.84     | 0.01                                 | 0.99     | 3.19E-11                              |
| <i>RNP 68kD</i>      | 0.15                              | 0.85     | 0.01                                 | 0.99     | 1.84E-10                              |
| <i>Ro 60kD/SSA60</i> | 0.37                              | 0.63     | 0.01                                 | 0.99     | 1.16E-28                              |

<sup>a</sup>Chi-square p-value comparing the differences in autoantibody positive frequency in the cases to controls.
